# Supplementary material for: Drug repurposing to tackle parainfluenza 3 based on multi-similarities and network proximity analysis
Source: Frontiers journal article supplement (doi:10.3389/fphar.2024.1428925), 2024-10-01
Supplement: Data_Sheet_2.zip [file Data_Sheet_2.zip]

## Sheet: (A)The SMILES  of 2585  drugs
The smiles of 2585 approved drugs
DrugBank ID	Name	Drug Groups	SMILES
DB00006	Bivalirudin	approved	CC[C@H](C)[C@H](NC(=O)[C@H](CCC(O)=O)NC(=O)[C@H](CCC(O)=O)NC(=O)[C@H](CC1=CC=CC=C1)NC(=O)[C@H](CC(O)=O)NC(=O)CNC(=O)[C@H](CC(N)=O)NC(=O)CNC(=O)CNC(=O)CNC(=O)CNC(=O)[C@@H]1CCCN1C(=O)[C@H](CCCNC(N)=N)NC(=O)[C@@H]1CCCN1C(=O)[C@H](N)CC1=CC=CC=C1)C(=O)N1CCC[C@H]1C(=O)N[C@@H](CCC(O)=O)C(=O)N[C@@H](CCC(O)=O)C(=O)N[C@@H](CC1=CC=C(O)C=C1)C(=O)N[C@@H](CC(C)C)C(O)=O
DB00007	Leuprolide	approved	CCNC(=O)[C@@H]1CCCN1C(=O)[C@H](CCCNC(N)=N)NC(=O)[C@H](CC(C)C)NC(=O)[C@@H](CC(C)C)NC(=O)[C@H](CC1=CC=C(O)C=C1)NC(=O)[C@H](CO)NC(=O)[C@H](CC1=CNC2=C1C=CC=C2)NC(=O)[C@H](CC1=CNC=N1)NC(=O)[C@@H]1CCC(=O)N1
DB00014	Goserelin	approved	CC(C)C[C@H](NC(=O)[C@@H](COC(C)(C)C)NC(=O)[C@H](CC1=CC=C(O)C=C1)NC(=O)[C@H](CO)NC(=O)[C@H](CC1=CNC2=CC=CC=C12)NC(=O)[C@H](CC1=CN=CN1)NC(=O)[C@@H]1CCC(=O)N1)C(=O)N[C@@H](CCCN=C(N)N)C(=O)N1CCC[C@H]1C(=O)NNC(N)=O
DB00027	Gramicidin D	approved	CC(C)C[C@@H](NC(=O)CNC(=O)[C@@H](NC=O)C(C)C)C(=O)N[C@@H](C)C(=O)N[C@H](C(C)C)C(=O)N[C@@H](C(C)C)C(=O)N[C@H](C(C)C)C(=O)N[C@@H](CC1=CNC2=C1C=CC=C2)C(=O)N[C@H](CC(C)C)C(=O)N[C@@H](CC1=CNC2=C1C=CC=C2)C(=O)N[C@H](CC(C)C)C(=O)N[C@@H](CC1=CNC2=C1C=CC=C2)C(=O)N[C@H](CC(C)C)C(=O)N[C@@H](CC1=CNC2=C1C=CC=C2)C(=O)NCCO
DB00035	Desmopressin	approved	NC(=O)CC[C@@H]1NC(=O)[C@H](CC2=CC=CC=C2)NC(=O)[C@H](CC2=CC=C(O)C=C2)NC(=O)CCSSC[C@H](NC(=O)[C@H](CC(N)=O)NC1=O)C(=O)N1CCC[C@H]1C(=O)N[C@H](CCCNC(N)=N)C(=O)NCC(N)=O
DB00050	Cetrorelix	approved	CC(C)C[C@H](NC(=O)[C@@H](CCCNC(N)=O)NC(=O)[C@H](CC1=CC=C(O)C=C1)NC(=O)[C@H](CO)NC(=O)[C@@H](CC1=CN=CC=C1)NC(=O)[C@@H](CC1=CC=C(Cl)C=C1)NC(=O)[C@@H](CC1=CC2=CC=CC=C2C=C1)NC(C)=O)C(=O)N[C@@H](CCCNC(N)=N)C(=O)N1CCC[C@H]1C(=O)N[C@H](C)C(N)=O
DB00067	Vasopressin	approved	NCCCCC(NC(=O)C1CCCN1C(=O)C1CSSCC(N)C(=O)NC(CC2=CC=C(O)C=C2)C(=O)NC(CC2=CC=CC=C2)C(=O)NC(CCC(N)=O)C(=O)NC(CC(N)=O)C(=O)N1)C(=O)NCC(N)=O.NC1CSSCC(NC(=O)C(CC(N)=O)NC(=O)C(CCC(N)=O)NC(=O)C(CC2=CC=CC=C2)NC(=O)C(CC2=CC=C(O)C=C2)NC1=O)C(=O)N1CCCC1C(=O)NC(CCCN=C(N)N)C(=O)NCC(N)=O
DB00080	Daptomycin	approved	CCCCCCCCCC(=O)N[C@@H](CC1=CNC2=C1C=CC=C2)C(=O)N[C@H](CC(N)=O)C(=O)N[C@@H](CC(O)=O)C(=O)N[C@H]1[C@@H](C)OC(=O)[C@H](CC(=O)C2=CC=CC=C2N)NC(=O)[C@@H](NC(=O)[C@@H](CO)NC(=O)CNC(=O)[C@H](CC(O)=O)NC(=O)[C@@H](C)NC(=O)[C@H](CC(O)=O)NC(=O)[C@H](CCCN)NC(=O)CNC1=O)[C@H](C)CC(O)=O
DB00091	Cyclosporine	approved	CC[C@@H]1NC(=O)[C@H]([C@H](O)[C@H](C)C\C=C\C)N(C)C(=O)[C@H](C(C)C)N(C)C(=O)[C@H](CC(C)C)N(C)C(=O)[C@H](CC(C)C)N(C)C(=O)[C@@H](C)NC(=O)[C@H](C)NC(=O)[C@H](CC(C)C)N(C)C(=O)[C@@H](NC(=O)[C@H](CC(C)C)N(C)C(=O)CN(C)C1=O)C(C)C
DB00106	Abarelix	approved	CC(C)C[C@H](NC(=O)[C@@H](CC(N)=O)NC(=O)[C@H](CC1=CC=C(O)C=C1)N(C)C(=O)[C@H](CO)NC(=O)[C@@H](CC1=CN=CC=C1)NC(=O)[C@@H](CC1=CC=C(Cl)C=C1)NC(=O)[C@@H](CC1=CC2=C(C=CC=C2)C=C1)NC(C)=O)C(=O)N[C@@H](CCCCNC(C)C)C(=O)N1CCC[C@H]1C(=O)N[C@H](C)C(N)=O
DB00114	Pyridoxal phosphate	approved	CC1=NC=C(COP(O)(O)=O)C(C=O)=C1O
DB00115	Cyanocobalamin	approved	C[C@H](CNC(=O)CC[C@]1(C)[C@@H](CC(N)=O)[C@H]2N=C1\C(C)=C1/N=C(/C=C3\N=C(\C(\C)=C4\[C@@H](CCC(N)=O)[C@](C)(CC(N)=O)[C@@]2(C)N4[Co+]C#N)[C@@](C)(CC(N)=O)[C@@H]3CCC(N)=O)C(C)(C)[C@@H]1CCC(N)=O)OP([O-])(=O)O[C@@H]1[C@@H](CO)O[C@@H]([C@@H]1O)N1C=NC2=C1C=C(C)C(C)=C2
DB00118	Ademetionine	approved	C[S+](CC[C@H](N)C([O-])=O)C[C@H]1O[C@H]([C@H](O)[C@@H]1O)N1C=NC2=C1N=CN=C2N
DB00119	Pyruvic acid	approved	CC(=O)C(O)=O
DB00120	Phenylalanine	approved	N[C@@H](CC1=CC=CC=C1)C(O)=O
DB00121	Biotin	approved	[H][C@]12CS[C@@H](CCCCC(O)=O)[C@@]1([H])NC(=O)N2
DB00122	Choline	approved	C[N+](C)(C)CCO
DB00123	Lysine	approved	NCCCC[C@H](N)C(O)=O
DB00126	Ascorbic acid	approved	[H][C@@]1(OC(=O)C(O)=C1O)[C@@H](O)CO
DB00128	Aspartic acid	approved	N[C@@H](CC(O)=O)C(O)=O
DB00129	Ornithine	approved	NCCC[C@H](N)C(O)=O
DB00130	L-Glutamine	approved	N[C@@H](CCC(N)=O)C(O)=O
DB00131	Adenosine phosphate	approved	NC1=C2N=CN([C@@H]3O[C@H](COP(O)(O)=O)[C@@H](O)[C@H]3O)C2=NC=N1
DB00132	alpha-Linolenic acid	approved	CC\C=C/C\C=C/C\C=C/CCCCCCCC(O)=O
DB00134	Methionine	approved	CSCC[C@H](N)C(O)=O
DB00135	Tyrosine	approved	N[C@@H](CC1=CC=C(O)C=C1)C(O)=O
DB00136	Calcitriol	approved	C[C@H](CCCC(C)(C)O)[C@@]1([H])CC[C@@]2([H])\C(CCC[C@]12C)=C\C=C1\C[C@@H](O)C[C@H](O)C1=C
DB00137	Lutein	approved	C\C(\C=C\C=C(/C)\C=C\[C@H]1C(C)=C[C@H](O)CC1(C)C)=C/C=C/C=C(\C)/C=C/C=C(\C)/C=C/C1=C(C)C[C@@H](O)CC1(C)C
DB00138	Cystine	approved	N[C@@H](CSSC[C@H](N)C(O)=O)C(O)=O
DB00139	Succinic acid	approved	OC(=O)CCC(O)=O
DB00140	Riboflavin	approved	CC1=C(C)C=C2N(C[C@H](O)[C@H](O)[C@H](O)CO)C3=NC(=O)NC(=O)C3=NC2=C1
DB00141	N-Acetylglucosamine	approved	[H]C(=O)[C@H](NC(C)=O)[C@@H](O)[C@H](O)[C@H](O)CO
DB00142	Glutamic acid	approved	N[C@@H](CCC(O)=O)C(O)=O
DB00143	Glutathione	approved	N[C@@H](CCC(=O)N[C@@H](CS)C(=O)NCC(O)=O)C(O)=O
DB00145	Glycine	approved	NCC(O)=O
DB00146	Calcifediol	approved	C[C@H](CCCC(C)(C)O)[C@@]1([H])CC[C@@]2([H])\C(CCC[C@]12C)=C\C=C1\C[C@@H](O)CCC1=C
DB00148	Creatine	approved	CN(CC(O)=O)C(N)=N
DB00150	Tryptophan	approved	N[C@@H](CC1=CNC2=C1C=CC=C2)C(O)=O
DB00151	Cysteine	approved	N[C@@H](CS)C(O)=O
DB00152	Thiamine	approved	CC1=C(CCO)SC=[N+]1CC1=CN=C(C)N=C1N
DB00153	Ergocalciferol	approved	CC(C)[C@@H](C)\C=C\[C@@H](C)[C@@]1([H])CC[C@@]2([H])\C(CCC[C@]12C)=C\C=C1\C[C@@H](O)CCC1=C
DB00156	Threonine	approved	C[C@@H](O)[C@H](N)C(O)=O
DB00157	NADH	approved	NC(=O)C1=CN(C=CC1)[C@@H]1O[C@H](CO[P@](O)(=O)O[P@](O)(=O)OC[C@H]2O[C@H]([C@H](O)[C@@H]2O)N2C=NC3=C(N)N=CN=C23)[C@@H](O)[C@H]1O
DB00158	Folic acid	approved	NC1=NC(=O)C2=NC(CNC3=CC=C(C=C3)C(=O)N[C@@H](CCC(O)=O)C(O)=O)=CN=C2N1
DB00159	Icosapent	approved	CC\C=C/C\C=C/C\C=C/C\C=C/C\C=C/CCCC(O)=O
DB00161	Valine	approved	CC(C)[C@H](N)C(O)=O
DB00162	Vitamin A	approved	C\C(=C/CO)\C=C\C=C(/C)\C=C\C1=C(C)CCCC1(C)C
DB00163	Vitamin E	approved	CC(C)CCC[C@@H](C)CCC[C@@H](C)CCC[C@]1(C)CCC2=C(O1)C(C)=C(C)C(O)=C2C
DB00165	Pyridoxine	approved	CC1=C(O)C(CO)=C(CO)C=N1
DB00166	Lipoic acid	approved	OC(=O)CCCC[C@@H]1CCSS1
DB00169	Cholecalciferol	approved	CC(C)CCC[C@@H](C)[C@@]1([H])CC[C@@]2([H])\C(CCC[C@]12C)=C\C=C1\C[C@@H](O)CCC1=C
DB00170	Menadione	approved	CC1=CC(=O)C2=CC=CC=C2C1=O
DB00173	Adenine	approved	NC1=C2NC=NC2=NC=N1
DB00174	Asparagine	approved	N[C@@H](CC(N)=O)C(O)=O
DB00175	Pravastatin	approved	[H][C@]12[C@H](C[C@H](O)C=C1C=C[C@H](C)[C@@H]2CC[C@@H](O)C[C@@H](O)CC(O)=O)OC(=O)[C@@H](C)CC
DB00176	Fluvoxamine	approved	COCCCC\C(=N/OCCN)C1=CC=C(C=C1)C(F)(F)F
DB00177	Valsartan	approved	CCCCC(=O)N(CC1=CC=C(C=C1)C1=CC=CC=C1C1=NNN=N1)[C@@H](C(C)C)C(O)=O
DB00178	Ramipril	approved	[H][C@@]12CCC[C@]1([H])N([C@@H](C2)C(O)=O)C(=O)[C@H](C)N[C@@H](CCC1=CC=CC=C1)C(=O)OCC
DB00179	Masoprocol	approved	C[C@@H](CC1=CC(O)=C(O)C=C1)[C@H](C)CC1=CC(O)=C(O)C=C1
DB00180	Flunisolide	approved	[H][C@@]12C[C@@]3([H])[C@]4([H])C[C@H](F)C5=CC(=O)C=C[C@]5(C)[C@@]4([H])[C@@H](O)C[C@]3(C)[C@@]1(OC(C)(C)O2)C(=O)CO
DB00181	Baclofen	approved	NCC(CC(O)=O)C1=CC=C(Cl)C=C1
DB00182	Amphetamine	approved	CC(N)CC1=CC=CC=C1
DB00183	Pentagastrin	approved	CSCC[C@H](NC(=O)[C@H](CC1=CNC2=C1C=CC=C2)NC(=O)CCNC(=O)OC(C)(C)C)C(=O)N[C@@H](CC(O)=O)C(=O)N[C@@H](CC1=CC=CC=C1)C(N)=O
DB00184	Nicotine	approved	CN1CCC[C@H]1C1=CN=CC=C1
DB00185	Cevimeline	approved	CC1O[C@@]2(CS1)CN1CCC2CC1
DB00186	Lorazepam	approved	OC1N=C(C2=CC=CC=C2Cl)C2=C(NC1=O)C=CC(Cl)=C2
DB00187	Esmolol	approved	COC(=O)CCC1=CC=C(OCC(O)CNC(C)C)C=C1
DB00188	Bortezomib	approved	CC(C)C[C@H](NC(=O)[C@H](CC1=CC=CC=C1)NC(=O)C1=CN=CC=N1)B(O)O
DB00189	Ethchlorvynol	approved	CCC(O)(\C=C\Cl)C#C
DB00190	Carbidopa	approved	C[C@@](CC1=CC(O)=C(O)C=C1)(NN)C(O)=O
DB00191	Phentermine	approved	CC(C)(N)CC1=CC=CC=C1
DB00192	Indecainide	approved	CC(C)NCCCC1(C(N)=O)C2=CC=CC=C2C2=CC=CC=C12
DB00193	Tramadol	approved	COC1=CC=CC(=C1)C1(O)CCCCC1CN(C)C
DB00194	Vidarabine	approved	NC1=NC=NC2=C1N=CN2[C@@H]1O[C@H](CO)[C@@H](O)[C@@H]1O
DB00195	Betaxolol	approved	CC(C)NCC(O)COC1=CC=C(CCOCC2CC2)C=C1
DB00196	Fluconazole	approved	OC(CN1C=NC=N1)(CN1C=NC=N1)C1=C(F)C=C(F)C=C1
DB00197	Troglitazone	approved	CC1=C(C)C2=C(CCC(C)(COC3=CC=C(CC4SC(=O)NC4=O)C=C3)O2)C(C)=C1O
DB00198	Oseltamivir	approved	CCOC(=O)C1=C[C@@H](OC(CC)CC)[C@H](NC(C)=O)[C@@H](N)C1
DB00199	Erythromycin	approved	CC[C@H]1OC(=O)[C@H](C)[C@@H](O[C@H]2C[C@@](C)(OC)[C@@H](O)[C@H](C)O2)[C@H](C)[C@@H](O[C@@H]2O[C@H](C)C[C@@H]([C@H]2O)N(C)C)[C@](C)(O)C[C@@H](C)C(=O)[C@H](C)[C@@H](O)[C@]1(C)O
DB00200	Hydroxocobalamin	approved	[N+]1=2[Co-3]345([N+]6=C7[C@H]([C@@](CC(=O)N)(C)[C@@]6([C@@]6(N3C(=C(C)C3=[N+]4C(C(C)(C)[C@@H]3CCC(=O)N)=CC3=[N+]5C(=C7C)[C@@](CC(=O)N)([C@@H]3CCC(=O)N)C)[C@@](C)([C@H]6CC(=O)N)CCC(NC[C@@H](C)OP(=O)(O[C@@H]3[C@H](O[C@H](N(C4=CC(=C(C=C14)C)C)C=2)[C@@H]3O)CO)[O-])=O)[H])C)CCC(=O)N)O[H]
DB00201	Caffeine	approved	CN1C=NC2=C1C(=O)N(C)C(=O)N2C
DB00202	Succinylcholine	approved	C[N+](C)(C)CCOC(=O)CCC(=O)OCC[N+](C)(C)C
DB00203	Sildenafil	approved	CCCC1=NN(C)C2=C1N=C(NC2=O)C1=CC(=CC=C1OCC)S(=O)(=O)N1CCN(C)CC1
DB00204	Dofetilide	approved	CN(CCOC1=CC=C(NS(C)(=O)=O)C=C1)CCC1=CC=C(NS(C)(=O)=O)C=C1
DB00205	Pyrimethamine	approved	CCC1=C(C(N)=NC(N)=N1)C1=CC=C(Cl)C=C1
DB00206	Reserpine	approved	[H][C@]12C[C@@H](OC(=O)C3=CC(OC)=C(OC)C(OC)=C3)[C@H](OC)[C@@H](C(=O)OC)[C@@]1([H])C[C@@]1([H])N(CCC3=C1NC1=C3C=CC(OC)=C1)C2
DB00207	Azithromycin	approved	CC[C@H]1OC(=O)[C@H](C)[C@@H](O[C@H]2C[C@@](C)(OC)[C@@H](O)[C@H](C)O2)[C@H](C)[C@@H](O[C@@H]2O[C@H](C)C[C@@H]([C@H]2O)N(C)C)[C@](C)(O)C[C@@H](C)CN(C)[C@H](C)[C@@H](O)[C@]1(C)O
DB00208	Ticlopidine	approved	ClC1=CC=CC=C1CN1CCC2=C(C1)C=CS2
DB00209	Trospium	approved	[H][C@]12CC[C@]([H])(C[C@@H](C1)OC(=O)C(O)(C1=CC=CC=C1)C1=CC=CC=C1)[N+]21CCCC1
DB00210	Adapalene	approved	COC1=C(C=C(C=C1)C1=CC2=C(C=C1)C=C(C=C2)C(O)=O)C12CC3CC(CC(C3)C1)C2
DB00211	Midodrine	approved	COC1=CC(C(O)CNC(=O)CN)=C(OC)C=C1
DB00213	Pantoprazole	approved	COC1=C(OC)C(CS(=O)C2=NC3=C(N2)C=C(OC(F)F)C=C3)=NC=C1
DB00214	Torasemide	approved	CC(C)NC(=O)NS(=O)(=O)C1=C(NC2=CC=CC(C)=C2)C=CN=C1
DB00215	Citalopram	approved	CN(C)CCCC1(OCC2=C1C=CC(=C2)C#N)C1=CC=C(F)C=C1
DB00216	Eletriptan	approved	CN1CCC[C@@H]1CC1=CNC2=C1C=C(CCS(=O)(=O)C1=CC=CC=C1)C=C2
DB00217	Bethanidine	approved	CN\C(NCC1=CC=CC=C1)=N/C
DB00218	Moxifloxacin	approved	[H][C@]12CN(C[C@@]1([H])NCCC2)C1=C(F)C=C2C(=O)C(=CN(C3CC3)C2=C1OC)C(O)=O
DB00219	Oxyphenonium	approved	CC[N+](C)(CC)CCOC(=O)C(O)(C1CCCCC1)C1=CC=CC=C1
DB00220	Nelfinavir	approved	[H][C@@]12CCCC[C@]1([H])CN(C[C@@H](O)[C@H](CSC1=CC=CC=C1)NC(=O)C1=C(C)C(O)=CC=C1)[C@@H](C2)C(=O)NC(C)(C)C
DB00221	Isoetharine	approved	CCC(NC(C)C)C(O)C1=CC(O)=C(O)C=C1
DB00222	Glimepiride	approved	CCC1=C(C)CN(C(=O)NCCC2=CC=C(C=C2)S(=O)(=O)NC(=O)N[C@H]2CC[C@H](C)CC2)C1=O
DB00223	Diflorasone	approved	[H][C@@]12C[C@H](C)[C@](O)(C(=O)CO)[C@@]1(C)C[C@H](O)[C@@]1(F)[C@@]2([H])C[C@H](F)C2=CC(=O)C=C[C@]12C
DB00224	Indinavir	approved	CC(C)(C)NC(=O)[C@@H]1CN(CC2=CN=CC=C2)CCN1C[C@@H](O)C[C@@H](CC1=CC=CC=C1)C(=O)N[C@@H]1[C@H](O)CC2=CC=CC=C12
DB00225	Gadodiamide	approved	[Gd+3].CNC(=O)CN(CCN(CCN(CC([O-])=O)CC(=O)NC)CC([O-])=O)CC([O-])=O
DB00226	Guanadrel	approved	NC(N)=NCC1COC2(CCCCC2)O1
DB00227	Lovastatin	approved	[H][C@]12[C@H](C[C@@H](C)C=C1C=C[C@H](C)[C@@H]2CC[C@@H]1C[C@@H](O)CC(=O)O1)OC(=O)[C@@H](C)CC
DB00228	Enflurane	approved	FC(F)OC(F)(F)C(F)Cl
DB00229	Cefotiam	approved	[H][C@]12SCC(CSC3=NN=NN3CCN(C)C)=C(N1C(=O)[C@H]2NC(=O)CC1=CSC(N)=N1)C(O)=O
DB00230	Pregabalin	approved	CC(C)C[C@H](CN)CC(O)=O
DB00231	Temazepam	approved	CN1C2=C(C=C(Cl)C=C2)C(=NC(O)C1=O)C1=CC=CC=C1
DB00233	Aminosalicylic acid	approved	NC1=CC(O)=C(C=C1)C(O)=O
DB00234	Reboxetine	approved	[H][C@@]1(CNCCO1)[C@H](OC1=CC=CC=C1OCC)C1=CC=CC=C1
DB00235	Milrinone	approved	CC1=C(C=C(C#N)C(=O)N1)C1=CC=NC=C1
DB00236	Pipobroman	approved	BrCCC(=O)N1CCN(CC1)C(=O)CCBr
DB00237	Butabarbital	approved	CCC(C)C1(CC)C(=O)NC(=O)NC1=O
DB00238	Nevirapine	approved	CC1=C2NC(=O)C3=C(N=CC=C3)N(C3CC3)C2=NC=C1
DB00239	Oxiconazole	approved	ClC1=CC(Cl)=C(CO\N=C(/CN2C=CN=C2)C2=CC=C(Cl)C=C2Cl)C=C1
DB00240	Alclometasone	approved	[H][C@@]12C[C@@H](C)[C@](O)(C(=O)CO)[C@@]1(C)C[C@H](O)[C@@]1([H])[C@@]2([H])[C@H](Cl)CC2=CC(=O)C=C[C@]12C
DB00241	Butalbital	approved	CC(C)CC1(CC=C)C(=O)NC(=O)NC1=O
DB00242	Cladribine	approved	NC1=C2N=CN([C@H]3C[C@H](O)[C@@H](CO)O3)C2=NC(Cl)=N1
DB00243	Ranolazine	approved	COC1=CC=CC=C1OCC(O)CN1CCN(CC(=O)NC2=C(C)C=CC=C2C)CC1
DB00244	Mesalazine	approved	NC1=CC(C(O)=O)=C(O)C=C1
DB00245	Benzatropine	approved	[H][C@]12CC[C@]([H])(C[C@@]([H])(C1)OC(C1=CC=CC=C1)C1=CC=CC=C1)N2C
DB00246	Ziprasidone	approved	ClC1=C(CCN2CCN(CC2)C2=NSC3=CC=CC=C23)C=C2CC(=O)NC2=C1
DB00247	Methysergide	approved	[H][C@@]12CC3=CN(C)C4=C3C(=CC=C4)C1=C[C@H](CN2C)C(=O)NC(CC)CO
DB00248	Cabergoline	approved	[H][C@@]12CC3=CNC4=CC=CC(=C34)[C@@]1([H])C[C@H](CN2CC=C)C(=O)N(CCCN(C)C)C(=O)NCC
DB00249	Idoxuridine	approved	OC[C@H]1O[C@H](C[C@@H]1O)N1C=C(I)C(=O)NC1=O
DB00250	Dapsone	approved	NC1=CC=C(C=C1)S(=O)(=O)C1=CC=C(N)C=C1
DB00251	Terconazole	approved	CC(C)N1CCN(CC1)C1=CC=C(OC[C@@H]2CO[C@](CN3C=NC=N3)(O2)C2=C(Cl)C=C(Cl)C=C2)C=C1
DB00252	Phenytoin	approved	O=C1NC(=O)C(N1)(C1=CC=CC=C1)C1=CC=CC=C1
DB00253	Medrysone	approved	[H][C@@]12CC[C@H](C(C)=O)[C@@]1(C)C[C@H](O)[C@@]1([H])[C@@]2([H])C[C@H](C)C2=CC(=O)CC[C@]12C
DB00254	Doxycycline	approved	[H][C@@]12[C@@H](C)C3=CC=CC(O)=C3C(=O)C1=C(O)[C@]1(O)C(=O)C(C(N)=O)=C(O)[C@@H](N(C)C)[C@]1([H])[C@H]2O
DB00255	Diethylstilbestrol	approved	CC\C(=C(\CC)C1=CC=C(O)C=C1)C1=CC=C(O)C=C1
DB00256	Lymecycline	approved	[H][C@@]12C[C@@]3([H])C(C(=O)C4=C(O)C=CC=C4[C@@]3(C)O)=C(O)[C@]1(O)C(=O)C(C(=O)NCNCCCC[C@H](N)C(O)=O)=C(O)[C@H]2N(C)C
DB00257	Clotrimazole	approved	ClC1=CC=CC=C1C(N1C=CN=C1)(C1=CC=CC=C1)C1=CC=CC=C1
DB00258	Calcium acetate	approved	[Ca++].CC([O-])=O.CC([O-])=O
DB00259	Sulfanilamide	approved	NC1=CC=C(C=C1)S(N)(=O)=O
DB00260	Cycloserine	approved	N[C@@H]1CONC1=O
DB00261	Anagrelide	approved	ClC1=CC=C2N=C3NC(=O)CN3CC2=C1Cl
DB00262	Carmustine	approved	ClCCNC(=O)N(CCCl)N=O
DB00263	Sulfisoxazole	approved	CC1=NOC(NS(=O)(=O)C2=CC=C(N)C=C2)=C1C
DB00264	Metoprolol	approved	COCCC1=CC=C(OCC(O)CNC(C)C)C=C1
DB00265	Crotamiton	approved	CCN(C(=O)C=CC)C1=CC=CC=C1C
DB00266	Dicoumarol	approved	OC1=C(CC2=C(O)C3=C(OC2=O)C=CC=C3)C(=O)OC2=C1C=CC=C2
DB00267	Cefmenoxime	approved	[H][C@]12SCC(CSC3=NN=NN3C)=C(N1C(=O)[C@H]2NC(=O)C(=N/OC)\C1=CSC(N)=N1)C(O)=O
DB00268	Ropinirole	approved	CCCN(CCC)CCC1=C2CC(=O)NC2=CC=C1
DB00270	Isradipine	approved	COC(=O)C1=C(C)NC(C)=C(C1C1=CC=CC2=NON=C12)C(=O)OC(C)C
DB00271	Diatrizoate	approved	CC(=O)NC1=C(I)C(C(O)=O)=C(I)C(NC(C)=O)=C1I
DB00272	Betazole	approved	NCCC1=CC=NN1
DB00273	Topiramate	approved	[H][C@@]12CO[C@@]3(COS(N)(=O)=O)OC(C)(C)O[C@@]3([H])[C@]1([H])OC(C)(C)O2
DB00274	Cefmetazole	approved	[H][C@]12SCC(CSC3=NN=NN3C)=C(N1C(=O)[C@]2(NC(=O)CSCC#N)OC)C(O)=O
DB00275	Olmesartan	approved	CCCC1=NC(=C(N1CC1=CC=C(C=C1)C1=C(C=CC=C1)C1=NN=NN1)C(O)=O)C(C)(C)O
DB00276	Amsacrine	approved	COC1=C(NC2=C3C=CC=CC3=NC3=CC=CC=C23)C=CC(NS(C)(=O)=O)=C1
DB00277	Theophylline	approved	CN1C2=C(NC=N2)C(=O)N(C)C1=O
DB00278	Argatroban	approved	C[C@@H]1CCN([C@H](C1)C(O)=O)C(=O)[C@H](CCCNC(N)=N)NS(=O)(=O)C1=CC=CC2=C1NCC(C)C2
DB00279	Liothyronine	approved	N[C@@H](CC1=CC(I)=C(OC2=CC(I)=C(O)C=C2)C(I)=C1)C(O)=O
DB00280	Disopyramide	approved	CC(C)N(CCC(C(N)=O)(C1=CC=CC=C1)C1=NC=CC=C1)C(C)C
DB00281	Lidocaine	approved	CCN(CC)CC(=O)NC1=C(C)C=CC=C1C
DB00282	Pamidronic acid	approved	NCCC(O)(P(O)(O)=O)P(O)(O)=O
DB00283	Clemastine	approved	CN1CCC[C@@H]1CCO[C@](C)(C1=CC=CC=C1)C1=CC=C(Cl)C=C1
DB00284	Acarbose	approved	[H]C(=O)[C@H](O)[C@@H](O)[C@]([H])(O[C@@]1([H])O[C@H](CO)[C@@]([H])(O[C@H]2O[C@H](C)[C@@H](N[C@@]3([H])C=C(CO)[C@@H](O)[C@H](O)[C@H]3O)[C@H](O)[C@H]2O)[C@H](O)[C@H]1O)[C@H](O)CO
DB00285	Venlafaxine	approved	COC1=CC=C(C=C1)C(CN(C)C)C1(O)CCCCC1
DB00287	Travoprost	approved	CC(C)OC(=O)CCC\C=C/C[C@H]1[C@@H](O)C[C@@H](O)[C@@H]1\C=C\[C@@H](O)COC1=CC=CC(=C1)C(F)(F)F
DB00288	Amcinonide	approved	[H][C@@]12C[C@H]3OC4(CCCC4)O[C@@]3(C(=O)COC(C)=O)[C@@]1(C)C[C@H](O)[C@@]1(F)[C@@]2([H])CCC2=CC(=O)C=C[C@]12C
DB00289	Atomoxetine	approved	CNCC[C@@H](OC1=CC=CC=C1C)C1=CC=CC=C1
DB00290	Bleomycin	approved	[H][C@](C)(NC(=O)[C@@]([H])(NC(=O)C1=NC(=NC(N)=C1C)[C@H](CC(N)=O)NC[C@H](N)C(N)=O)[C@@]([H])(OC1OC(CO)C(O)C(O)C1OC1OC(CO)C(O)C(OC(N)=O)C1O)C1=CNC=N1)[C@@H](O)[C@H](C)C(=O)N[C@]([H])(C(=O)NCCC1=NC(=CS1)C1=NC(=CS1)C(=O)NCCC[S+](C)C)[C@@]([H])(C)O
DB00291	Chlorambucil	approved	OC(=O)CCCC1=CC=C(C=C1)N(CCCl)CCCl
DB00292	Etomidate	approved	CCOC(=O)C1=CN=CN1[C@H](C)C1=CC=CC=C1
DB00293	Raltitrexed	approved	CN(CC1=CC2=C(NC(C)=NC2=O)C=C1)C1=CC=C(S1)C(=O)N[C@@H](CCC(O)=O)C(O)=O
DB00294	Etonogestrel	approved	[H][C@@]12CC[C@@](O)(C#C)[C@@]1(CC)CC(=C)[C@]1([H])[C@@]3([H])CCC(=O)C=C3CC[C@@]21[H]
DB00295	Morphine	approved	[H][C@@]12OC3=C(O)C=CC4=C3[C@@]11CCN(C)[C@]([H])(C4)[C@]1([H])C=C[C@@H]2O
DB00296	Ropivacaine	approved	CCCN1CCCC[C@H]1C(=O)NC1=C(C)C=CC=C1C
DB00297	Bupivacaine	approved	CCCCN1CCCCC1C(=O)NC1=C(C)C=CC=C1C
DB00298	Dapiprazole	approved	CC1=CC=CC=C1N1CCN(CCC2=NN=C3CCCCN23)CC1
DB00299	Penciclovir	approved	NC1=NC(=O)C2=C(N1)N(CCC(CO)CO)C=N2
DB00300	Tenofovir disoproxil	approved	[H][C@@](C)(CN1C=NC2=C(N)N=CN=C12)OCP(=O)(OCOC(=O)OC(C)C)OCOC(=O)OC(C)C
DB00301	Flucloxacillin	approved	[H][C@]12SC(C)(C)[C@@H](N1C(=O)[C@H]2NC(=O)C1=C(C)ON=C1C1=C(Cl)C=CC=C1F)C(O)=O
DB00302	Tranexamic acid	approved	NC[C@H]1CC[C@@H](CC1)C(O)=O
DB00303	Ertapenem	approved	[H][C@]12[C@@H](C)C(S[C@]3([H])CN[C@@]([H])(C3)C(=O)NC3=CC=CC(=C3)C(O)=O)=C(N1C(=O)[C@]2([H])[C@@H](C)O)C(O)=O
DB00304	Desogestrel	approved	[H][C@@]12CC[C@@](O)(C#C)[C@@]1(CC)CC(=C)[C@]1([H])[C@@]3([H])CCCC=C3CC[C@@]21[H]
DB00305	Mitomycin	approved	[H][C@]12CN3C4=C([C@@H](COC(N)=O)[C@@]3(OC)[C@@]1([H])N2)C(=O)C(N)=C(C)C4=O
DB00306	Talbutal	approved	CCC(C)C1(CC=C)C(=O)NC(=O)NC1=O
DB00307	Bexarotene	approved	CC1=CC2=C(C=C1C(=C)C1=CC=C(C=C1)C(O)=O)C(C)(C)CCC2(C)C
DB00308	Ibutilide	approved	CCCCCCCN(CC)CCCC(O)C1=CC=C(NS(C)(=O)=O)C=C1
DB00309	Vindesine	approved	[H][C@@]12N3CC[C@@]11C4=CC(=C(OC)C=C4N(C)[C@@]1([H])[C@](O)([C@H](O)[C@]2(CC)C=CC3)C(N)=O)[C@]1(C[C@@]2([H])CN(C[C@](O)(CC)C2)CCC2=C1NC1=C2C=CC=C1)C(=O)OC
DB00310	Chlorthalidone	approved	NS(=O)(=O)C1=C(Cl)C=CC(=C1)C1(O)NC(=O)C2=CC=CC=C12
DB00312	Pentobarbital	approved	CCCC(C)C1(CC)C(=O)NC(=O)NC1=O
DB00313	Valproic acid	approved	CCCC(CCC)C(O)=O
DB00314	Capreomycin	approved	[H][C@@]1(CCN=C(N)N1)[C@]1([H])NC(=O)\C(NC(=O)[C@H](CNC(=O)C[C@@H](N)CCCN)NC(=O)[C@H](C)NC(=O)[C@@H](N)CNC1=O)=C/NC(N)=O.[H][C@@]1(CCN=C(N)N1)[C@]1([H])NC(=O)\C(NC(=O)[C@H](CNC(=O)C[C@@H](N)CCCN)NC(=O)[C@H](CO)NC(=O)[C@@H](N)CNC1=O)=C/NC(N)=O
DB00315	Zolmitriptan	approved	CN(C)CCC1=CNC2=CC=C(C[C@H]3COC(=O)N3)C=C12
DB00316	Acetaminophen	approved	CC(=O)NC1=CC=C(O)C=C1
DB00317	Gefitinib	approved	COC1=C(OCCCN2CCOCC2)C=C2C(NC3=CC(Cl)=C(F)C=C3)=NC=NC2=C1
DB00318	Codeine	approved	[H][C@]12C=C[C@H](O)[C@@H]3OC4=C5C(C[C@H]1N(C)CC[C@@]235)=CC=C4OC
DB00319	Piperacillin	approved	[H][C@]12SC(C)(C)[C@@H](N1C(=O)[C@H]2NC(=O)[C@H](NC(=O)N1CCN(CC)C(=O)C1=O)C1=CC=CC=C1)C(O)=O
DB00320	Dihydroergotamine	approved	[H][C@@]12CCCN1C(=O)[C@H](CC1=CC=CC=C1)N1C(=O)[C@](C)(NC(=O)[C@H]3CN(C)[C@]4([H])CC5=CNC6=CC=CC(=C56)[C@@]4([H])C3)O[C@@]21O
DB00321	Amitriptyline	approved	CN(C)CCC=C1C2=CC=CC=C2CCC2=CC=CC=C12
DB00322	Floxuridine	approved	OC[C@H]1O[C@H](C[C@@H]1O)N1C=C(F)C(=O)NC1=O
DB00323	Tolcapone	approved	CC1=CC=C(C=C1)C(=O)C1=CC(=C(O)C(O)=C1)[N+]([O-])=O
DB00324	Fluorometholone	approved	[H][C@@]12CC[C@](O)(C(C)=O)[C@@]1(C)C[C@H](O)[C@@]1(F)[C@@]2([H])C[C@H](C)C2=CC(=O)C=C[C@]12C
DB00325	Nitroprusside	approved	O=N[Fe--](C#N)(C#N)(C#N)(C#N)C#N
DB00326	Calcium glucoheptonate	approved	[Ca++].OC[C@@H](O)[C@@H](O)[C@H](O)[C@@H](O)C(O)C([O-])=O.OC[C@@H](O)[C@@H](O)[C@H](O)[C@@H](O)C(O)C([O-])=O
DB00327	Hydromorphone	approved	[H][C@@]12OC3=C(O)C=CC4=C3[C@@]11CCN(C)[C@]([H])(C4)[C@]1([H])CCC2=O
DB00328	Indomethacin	approved	COC1=CC2=C(C=C1)N(C(=O)C1=CC=C(Cl)C=C1)C(C)=C2CC(O)=O
DB00330	Ethambutol	approved	CC[C@@H](CO)NCCN[C@@H](CC)CO
DB00331	Metformin	approved	CN(C)C(=N)NC(N)=N
DB00332	Ipratropium	approved	[H][C@]12CC[C@]([H])(C[C@@H](C1)OC(=O)C(CO)C1=CC=CC=C1)[N+]2(C)C(C)C
DB00333	Methadone	approved	CCC(=O)C(CC(C)N(C)C)(C1=CC=CC=C1)C1=CC=CC=C1
DB00334	Olanzapine	approved	CN1CCN(CC1)C1=NC2=CC=CC=C2NC2=C1C=C(C)S2
DB00335	Atenolol	approved	CC(C)NCC(O)COC1=CC=C(CC(N)=O)C=C1
DB00336	Nitrofural	approved	NC(=O)N\N=C\C1=CC=C(O1)[N+]([O-])=O
DB00337	Pimecrolimus	approved	[H][C@]1(CC[C@H](Cl)[C@@H](C1)OC)\C=C(/C)[C@@]1([H])OC(=O)[C@]2([H])CCCCN2C(=O)C(=O)[C@]2(O)O[C@@]([H])([C@H](C[C@H]2C)OC)[C@H](C[C@@H](C)C\C(C)=C\[C@@H](CC)C(=O)C[C@H](O)[C@H]1C)OC
DB00338	Omeprazole	approved	COC1=CC2=C(C=C1)N=C(N2)S(=O)CC1=NC=C(C)C(OC)=C1C
DB00339	Pyrazinamide	approved	NC(=O)C1=NC=CN=C1
DB00340	Metixene	approved	CN1CCCC(CC2C3=CC=CC=C3SC3=CC=CC=C23)C1
DB00341	Cetirizine	approved	OC(=O)COCCN1CCN(CC1)C(C1=CC=CC=C1)C1=CC=C(Cl)C=C1
DB00342	Terfenadine	approved	CC(C)(C)C1=CC=C(C=C1)C(O)CCCN1CCC(CC1)C(O)(C1=CC=CC=C1)C1=CC=CC=C1
DB00343	Diltiazem	approved	COC1=CC=C(C=C1)[C@@H]1SC2=C(C=CC=C2)N(CCN(C)C)C(=O)[C@@H]1OC(C)=O
DB00344	Protriptyline	approved	CNCCCC1C2=CC=CC=C2C=CC2=CC=CC=C12
DB00345	Aminohippuric acid	approved	NC1=CC=C(C=C1)C(=O)NCC(O)=O
DB00346	Alfuzosin	approved	COC1=CC2=C(C=C1OC)C(N)=NC(=N2)N(C)CCCNC(=O)C1CCCO1
DB00347	Trimethadione	approved	CN1C(=O)OC(C)(C)C1=O
DB00348	Nitisinone	approved	[O-][N+](=O)C1=C(C=CC(=C1)C(F)(F)F)C(=O)C1C(=O)CCCC1=O
DB00349	Clobazam	approved	CN1C2=C(C=C(Cl)C=C2)N(C2=CC=CC=C2)C(=O)CC1=O
DB00350	Minoxidil	approved	NC1=CC(=NC(N)=[N+]1[O-])N1CCCCC1
DB00351	Megestrol acetate	approved	[H][C@@]12CC[C@](OC(C)=O)(C(C)=O)[C@@]1(C)CC[C@@]1([H])[C@@]2([H])C=C(C)C2=CC(=O)CC[C@]12C
DB00352	Tioguanine	approved	NC1=NC(=S)C2=C(N1)N=CN2
DB00353	Methylergometrine	approved	[H][C@@]12CC3=CNC4=CC=CC(=C34)C1=C[C@H](CN2C)C(=O)N[C@@H](CC)CO
DB00354	Buclizine	approved	CC(C)(C)C1=CC=C(CN2CCN(CC2)C(C2=CC=CC=C2)C2=CC=C(Cl)C=C2)C=C1
DB00355	Aztreonam	approved	C[C@H]1[C@H](NC(=O)C(=N/OC(C)(C)C(=O)O)\C2=CSC([NH3+])=N2)C(=O)N1S([O-])(=O)=O
DB00356	Chlorzoxazone	approved	ClC1=CC2=C(OC(=O)N2)C=C1
DB00357	Aminoglutethimide	approved	CCC1(CCC(=O)NC1=O)C1=CC=C(N)C=C1
DB00358	Mefloquine	approved	OC(C1CCCCN1)C1=CC(=NC2=C1C=CC=C2C(F)(F)F)C(F)(F)F
DB00359	Sulfadiazine	approved	NC1=CC=C(C=C1)S(=O)(=O)NC1=NC=CC=N1
DB00360	Sapropterin	approved	[H][C@@]1(CNC2=C(N1)C(=O)NC(N)=N2)[C@@H](O)[C@H](C)O
DB00361	Vinorelbine	approved	[H][C@@]12N(C)C3=CC(OC)=C(C=C3[C@@]11CCN3CC=C[C@](CC)([C@@]13[H])[C@@]([H])(OC(C)=O)[C@]2(O)C(=O)OC)[C@]1(C[C@@]2([H])CN(CC(CC)=C2)CC2=C1NC1=CC=CC=C21)C(=O)OC
DB00362	Anidulafungin	approved	[H][C@]1(NC(=O)[C@@H](NC(=O)[C@@H]2C[C@@H](O)CN2C(=O)[C@@H](NC(=O)[C@H](C[C@@H](O)[C@@H](O)NC(=O)[C@@H]2[C@@H](O)[C@@H](C)CN2C1=O)NC(=O)C1=CC=C(C=C1)C1=CC=C(C=C1)C1=CC=C(OCCCCC)C=C1)[C@@H](C)O)[C@H](O)[C@@H](O)C1=CC=C(O)C=C1)[C@@H](C)O
DB00363	Clozapine	approved	CN1CCN(CC1)C1=NC2=CC(Cl)=CC=C2NC2=CC=CC=C12
DB00364	Sucralfate	approved	O.O[Al](O)O.O[Al](O)OS(=O)(=O)OC[C@H]1O[C@@](COS(=O)(=O)O[Al](O)O)(O[C@H]2O[C@H](COS(=O)(=O)O[Al](O)O)[C@@H](OS(=O)(=O)O[Al](O)O)[C@H](OS(=O)(=O)O[Al](O)O)[C@H]2OS(=O)(=O)O[Al](O)O)[C@@H](OS(=O)(=O)O[Al](O)O)[C@@H]1OS(=O)(=O)O[Al](O)O
DB00365	Grepafloxacin	approved	CC1CN(CCN1)C1=C(F)C(C)=C2C(=O)C(=CN(C3CC3)C2=C1)C(O)=O
DB00366	Doxylamine	approved	CN(C)CCOC(C)(C1=CC=CC=C1)C1=CC=CC=N1
DB00367	Levonorgestrel	approved	[H][C@@]12CC[C@@](O)(C#C)[C@@]1(CC)CC[C@]1([H])[C@@]3([H])CCC(=O)C=C3CC[C@@]21[H]
DB00368	Norepinephrine	approved	NC[C@H](O)C1=CC(O)=C(O)C=C1
DB00369	Cidofovir	approved	NC1=NC(=O)N(C[C@@H](CO)OCP(O)(O)=O)C=C1
DB00370	Mirtazapine	approved	CN1CCN2C(C1)C1=CC=CC=C1CC1=C2N=CC=C1
DB00371	Meprobamate	approved	CCCC(C)(COC(N)=O)COC(N)=O
DB00372	Thiethylperazine	approved	CCSC1=CC2=C(SC3=CC=CC=C3N2CCCN2CCN(C)CC2)C=C1
DB00373	Timolol	approved	[H][C@](O)(CNC(C)(C)C)COC1=NSN=C1N1CCOCC1
DB00374	Treprostinil	approved	[H][C@]12C[C@@H](O)[C@H](CC[C@@H](O)CCCCC)[C@@]1([H])CC1=C(C2)C(OCC(O)=O)=CC=C1
DB00376	Trihexyphenidyl	approved	OC(CCN1CCCCC1)(C1CCCCC1)C1=CC=CC=C1
DB00377	Palonosetron	approved	[H][C@]12CCCC3=C1C(=CC=C3)C(=O)N(C2)[C@@H]1CN2CCC1CC2
DB00378	Dydrogesterone	approved	[H][C@@]12CC[C@H](C(C)=O)[C@@]1(C)CC[C@]1([H])[C@@]2([H])C=CC2=CC(=O)CC[C@@]12C
DB00379	Mexiletine	approved	CC(N)COC1=C(C)C=CC=C1C
DB00380	Dexrazoxane	approved	C[C@@H](CN1CC(=O)NC(=O)C1)N1CC(=O)NC(=O)C1
DB00381	Amlodipine	approved	CCOC(=O)C1=C(COCCN)NC(C)=C(C1C1=CC=CC=C1Cl)C(=O)OC
DB00382	Tacrine	approved	NC1=C2CCCCC2=NC2=CC=CC=C12
DB00383	Oxyphencyclimine	approved	CN1CCCN=C1COC(=O)C(O)(C1CCCCC1)C1=CC=CC=C1
DB00384	Triamterene	approved	NC1=NC(N)=C2N=C(C(N)=NC2=N1)C1=CC=CC=C1
DB00385	Valrubicin	approved	[H][C@@]1(C[C@@](O)(CC2=C(O)C3=C(C(O)=C12)C(=O)C1=C(OC)C=CC=C1C3=O)C(=O)COC(=O)CCCC)O[C@H]1C[C@H](NC(=O)C(F)(F)F)[C@H](O)[C@H](C)O1
DB00387	Procyclidine	approved	OC(CCN1CCCC1)(C1CCCCC1)C1=CC=CC=C1
DB00388	Phenylephrine	approved	CNC[C@H](O)C1=CC(O)=CC=C1
DB00389	Carbimazole	approved	CCOC(=O)N1C=CN(C)C1=S
DB00390	Digoxin	approved	[H][C@]12CC[C@]3([H])[C@]([H])(C[C@@H](O)[C@]4(C)[C@H](CC[C@]34O)C3=CC(=O)OC3)[C@@]1(C)CC[C@@H](C2)O[C@H]1C[C@H](O)[C@H](O[C@H]2C[C@H](O)[C@H](O[C@H]3C[C@H](O)[C@H](O)[C@@H](C)O3)[C@@H](C)O2)[C@@H](C)O1
DB00391	Sulpiride	approved	CCN1CCCC1CNC(=O)C1=C(OC)C=CC(=C1)S(N)(=O)=O
DB00392	Profenamine	approved	CCN(CC)C(C)CN1C2=CC=CC=C2SC2=CC=CC=C12
DB00393	Nimodipine	approved	COCCOC(=O)C1=C(C)NC(C)=C(C1C1=CC(=CC=C1)[N+]([O-])=O)C(=O)OC(C)C
DB00394	Beclomethasone dipropionate	approved	[H][C@@]12C[C@H](C)[C@](OC(=O)CC)(C(=O)COC(=O)CC)[C@@]1(C)C[C@H](O)[C@@]1(Cl)[C@@]2([H])CCC2=CC(=O)C=C[C@]12C
DB00395	Carisoprodol	approved	CCCC(C)(COC(N)=O)COC(=O)NC(C)C
DB00396	Progesterone	approved	[H][C@@]12CC[C@H](C(C)=O)[C@@]1(C)CC[C@@]1([H])[C@@]2([H])CCC2=CC(=O)CC[C@]12C
DB00397	Phenylpropanolamine	approved	CC(N)C(O)C1=CC=CC=C1
DB00398	Sorafenib	approved	CNC(=O)C1=NC=CC(OC2=CC=C(NC(=O)NC3=CC(=C(Cl)C=C3)C(F)(F)F)C=C2)=C1
DB00399	Zoledronic acid	approved	OC(CN1C=CN=C1)(P(O)(O)=O)P(O)(O)=O
DB00400	Griseofulvin	approved	COC1=CC(OC)=C(Cl)C2=C1C(=O)[C@]1(O2)[C@H](C)CC(=O)C=C1OC
DB00401	Nisoldipine	approved	COC(=O)C1=C(C)NC(C)=C(C1C1=CC=CC=C1[N+]([O-])=O)C(=O)OCC(C)C
DB00402	Eszopiclone	approved	CN1CCN(CC1)C(=O)O[C@@H]1N(C(=O)C2=NC=CN=C12)C1=NC=C(Cl)C=C1
DB00403	Ceruletide	approved	[H][C@](NC(=O)[C@H](CC1=CC=C(OS(O)(=O)=O)C=C1)NC(=O)[C@H](CC(O)=O)NC(=O)[C@H](CCC(N)=O)NC(=O)[C@@H]1CCC(=O)N1)([C@@H](C)O)C(=O)NCC(=O)N[C@@H](CC1=CNC2=CC=CC=C12)C(=O)N[C@@H](CCSC)C(=O)N[C@@H](CC(O)=O)C(=O)N[C@@H](CC1=CC=CC=C1)C(N)=O
DB00404	Alprazolam	approved	CC1=NN=C2CN=C(C3=CC=CC=C3)C3=C(C=CC(Cl)=C3)N12
DB00405	Dexbrompheniramine	approved	CN(C)CC[C@@H](C1=CC=C(Br)C=C1)C1=CC=CC=N1
DB00406	Gentian violet cation	approved	CN(C)C1=CC=C(C=C1)C(C1=CC=C(C=C1)N(C)C)=C1C=CC(C=C1)=[N+](C)C
DB00408	Loxapine	approved	CN1CCN(CC1)C1=NC2=CC=CC=C2OC2=C1C=C(Cl)C=C2
DB00409	Remoxipride	approved	CCN1CCC[C@H]1CNC(=O)C1=C(OC)C=CC(Br)=C1OC
DB00410	Mupirocin	approved	C[C@H](O)[C@H](C)[C@@H]1O[C@H]1C[C@H]1CO[C@@H](C\C(C)=C\C(=O)OCCCCCCCCC(O)=O)[C@H](O)[C@@H]1O
DB00411	Carbamoylcholine	approved	C[N+](C)(C)CCOC(N)=O
DB00412	Rosiglitazone	approved	CN(CCOC1=CC=C(CC2SC(=O)NC2=O)C=C1)C1=CC=CC=N1
DB00413	Pramipexole	approved	CCCN[C@H]1CCC2=C(C1)SC(N)=N2
DB00414	Acetohexamide	approved	CC(=O)C1=CC=C(C=C1)S(=O)(=O)NC(=O)NC1CCCCC1
DB00415	Ampicillin	approved	[H][C@]12SC(C)(C)[C@@H](N1C(=O)[C@H]2NC(=O)[C@H](N)C1=CC=CC=C1)C(O)=O
DB00416	Metocurine iodide	approved	[I-].[I-].[H][C@@]12CC3=CC=C(OC4=C5C(CC[N+](C)(C)[C@]5([H])CC5=CC(OC6=C(OC)C=C(CC[N+]1(C)C)C2=C6)=C(OC)C=C5)=CC(OC)=C4OC)C=C3
DB00417	Phenoxymethylpenicillin	approved	[H][C@]12SC(C)(C)[C@@H](N1C(=O)[C@H]2NC(=O)COC1=CC=CC=C1)C(O)=O
DB00418	Secobarbital	approved	CCCC(C)C1(CC=C)C(=O)NC(=O)NC1=O
DB00419	Miglustat	approved	CCCCN1C[C@H](O)[C@@H](O)[C@H](O)[C@H]1CO
DB00420	Promazine	approved	CN(C)CCCN1C2=CC=CC=C2SC2=CC=CC=C12
DB00421	Spironolactone	approved	[H][C@@]12CC[C@@]3(CCC(=O)O3)[C@@]1(C)CC[C@@]1([H])[C@@]2([H])[C@@]([H])(CC2=CC(=O)CC[C@]12C)SC(C)=O
DB00422	Methylphenidate	approved	COC(=O)C(C1CCCCN1)C1=CC=CC=C1
DB00423	Methocarbamol	approved	COC1=C(OCC(O)COC(N)=O)C=CC=C1
DB00424	Hyoscyamine	approved	CN1[C@H]2CC[C@@H]1C[C@@H](C2)OC(=O)[C@H](CO)C1=CC=CC=C1
DB00425	Zolpidem	approved	CN(C)C(=O)CC1=C(N=C2C=CC(C)=CN12)C1=CC=C(C)C=C1
DB00426	Famciclovir	approved	CC(=O)OCC(CCN1C=NC2=CN=C(N)N=C12)COC(C)=O
DB00427	Triprolidine	approved	CC1=CC=C(C=C1)C(=C/CN1CCCC1)\C1=CC=CC=N1
DB00428	Streptozocin	approved	CN(N=O)C(=O)N[C@H]1[C@@H](O)O[C@H](CO)[C@@H](O)[C@@H]1O
DB00429	Carboprost tromethamine	approved	NC(CO)(CO)CO.CCCCC[C@](C)(O)\C=C\[C@H]1[C@H](O)C[C@H](O)[C@@H]1C\C=C/CCCC(O)=O
DB00430	Cefpiramide	approved	[H][C@]12SCC(CSC3=NN=NN3C)=C(N1C(=O)[C@@]2([H])NC(=O)[C@H](NC(=O)C1=C(O)C=C(C)N=C1)C1=CC=C(O)C=C1)C(O)=O
DB00431	Lindane	approved	Cl[C@H]1[C@H](Cl)[C@@H](Cl)[C@@H](Cl)[C@H](Cl)[C@H]1Cl
DB00432	Trifluridine	approved	OC[C@H]1O[C@H](C[C@@H]1O)N1C=C(C(=O)NC1=O)C(F)(F)F
DB00433	Prochlorperazine	approved	CN1CCN(CCCN2C3=CC=CC=C3SC3=C2C=C(Cl)C=C3)CC1
DB00434	Cyproheptadine	approved	CN1CCC(CC1)=C1C2=CC=CC=C2C=CC2=CC=CC=C12
DB00435	Nitric Oxide	approved	[N]=O
DB00436	Bendroflumethiazide	approved	NS(=O)(=O)C1=CC2=C(NC(CC3=CC=CC=C3)NS2(=O)=O)C=C1C(F)(F)F
DB00437	Allopurinol	approved	OC1=NC=NC2=C1C=NN2
DB00438	Ceftazidime	approved	[O-]C(=O)C1=C(CS[C@]2([H])[C@H](NC(=O)C(=N/OC(C)(C)C(O)=O)\C3=CSC(N)=N3)C(=O)N12)C[N+]1=CC=CC=C1
DB00439	Cerivastatin	approved	COCC1=C(C2=CC=C(F)C=C2)C(\C=C\[C@@H](O)C[C@@H](O)CC(O)=O)=C(C(C)C)N=C1C(C)C
DB00440	Trimethoprim	approved	COC1=CC(CC2=CN=C(N)N=C2N)=CC(OC)=C1OC
DB00441	Gemcitabine	approved	NC1=NC(=O)N(C=C1)[C@@H]1O[C@H](CO)[C@@H](O)C1(F)F
DB00442	Entecavir	approved	NC1=NC(=O)C2=C(N1)N(C=N2)[C@H]1C[C@H](O)[C@@H](CO)C1=C
DB00443	Betamethasone	approved	[H][C@@]12C[C@H](C)[C@](O)(C(=O)CO)[C@@]1(C)C[C@H](O)[C@@]1(F)[C@@]2([H])CCC2=CC(=O)C=C[C@]12C
DB00444	Teniposide	approved	[H][C@]12COC(=O)[C@]1([H])[C@H](C1=CC(OC)=C(O)C(OC)=C1)C1=C(C=C3OCOC3=C1)[C@H]2O[C@]1([H])O[C@]2([H])CO[C@H](O[C@@]2([H])[C@H](O)[C@H]1O)C1=CC=CS1
DB00445	Epirubicin	approved	COC1=CC=CC2=C1C(=O)C1=C(O)C3=C(C[C@](O)(C[C@@H]3O[C@H]3C[C@H](N)[C@@H](O)[C@H](C)O3)C(=O)CO)C(O)=C1C2=O
DB00446	Chloramphenicol	approved	OC[C@@H](NC(=O)C(Cl)Cl)[C@H](O)C1=CC=C(C=C1)[N+]([O-])=O
DB00447	Loracarbef	approved	N[C@@H](C(=O)N[C@H]1[C@H]2CCC(Cl)=C(N2C1=O)C(O)=O)C1=CC=CC=C1
DB00448	Lansoprazole	approved	CC1=C(OCC(F)(F)F)C=CN=C1CS(=O)C1=NC2=CC=CC=C2N1
DB00449	Dipivefrin	approved	CNCC(O)C1=CC(OC(=O)C(C)(C)C)=C(OC(=O)C(C)(C)C)C=C1
DB00450	Droperidol	approved	FC1=CC=C(C=C1)C(=O)CCCN1CCC(=CC1)N1C(=O)NC2=CC=CC=C12
DB00451	Levothyroxine	approved	N[C@@H](CC1=CC(I)=C(OC2=CC(I)=C(O)C(I)=C2)C(I)=C1)C(O)=O
DB00452	Framycetin	approved	NC[C@@H]1O[C@H](O[C@@H]2[C@@H](CO)O[C@@H](O[C@@H]3[C@@H](O)[C@H](N)C[C@H](N)[C@H]3O[C@H]3O[C@H](CN)[C@@H](O)[C@H](O)[C@H]3N)[C@@H]2O)[C@H](N)[C@@H](O)[C@@H]1O
DB00454	Meperidine	approved	CCOC(=O)C1(CCN(C)CC1)C1=CC=CC=C1
DB00455	Loratadine	approved	CCOC(=O)N1CCC(CC1)=C1C2=C(CCC3=C1N=CC=C3)C=C(Cl)C=C2
DB00456	Cefalotin	approved	[H][C@@]1(NC(=O)CC2=CC=CS2)C(=O)N2C(C(O)=O)=C(COC(C)=O)CS[C@]12[H]
DB00457	Prazosin	approved	COC1=C(OC)C=C2C(N)=NC(=NC2=C1)N1CCN(CC1)C(=O)C1=CC=CO1
DB00458	Imipramine	approved	CN(C)CCCN1C2=CC=CC=C2CCC2=CC=CC=C12
DB00459	Acitretin	approved	COC1=C(C)C(C)=C(\C=C\C(\C)=C\C=C\C(\C)=C\C(O)=O)C(C)=C1
DB00460	Verteporfin	approved	COC(=O)CCC1=C2NC(\C=C3/N=C(/C=C4\N\C(=C/C5=N/C(=C\2)/C(CCC(O)=O)=C5C)C(C=C)=C4C)C2=CC=C([C@@H](C(=O)OC)[C@@]32C)C(=O)OC)=C1C
DB00461	Nabumetone	approved	COC1=CC2=C(C=C1)C=C(CCC(C)=O)C=C2
DB00462	Methscopolamine bromide	approved	[Br-].[H][C@@]12O[C@]1([H])[C@H]1C[C@H](C[C@@H]2[N+]1(C)C)OC(=O)[C@H](CO)C1=CC=CC=C1
DB00464	Sodium tetradecyl sulfate	approved	[Na+].CCCCC(CC)CCC(CC(C)C)OS([O-])(=O)=O
DB00465	Ketorolac	approved	OC(=O)C1CCN2C1=CC=C2C(=O)C1=CC=CC=C1
DB00467	Enoxacin	approved	CCN1C=C(C(O)=O)C(=O)C2=CC(F)=C(N=C12)N1CCNCC1
DB00468	Quinine	approved	[H][C@]1(C[C@@H]2CC[N@]1C[C@@H]2C=C)[C@H](O)C1=CC=NC2=CC=C(OC)C=C12
DB00469	Tenoxicam	approved	CN1C(C(=O)NC2=CC=CC=N2)=C(O)C2=C(C=CS2)S1(=O)=O
DB00470	Dronabinol	approved	[H][C@@]12C=C(C)CC[C@@]1([H])C(C)(C)OC1=C2C(O)=CC(CCCCC)=C1
DB00471	Montelukast	approved	OC(=O)CC1(CC1)CS[C@H](CCC1=CC=CC=C1C(O)(C)C)C1=CC=CC(\C=C\C2=NC3=C(C=CC(Cl)=C3)C=C2)=C1
DB00472	Fluoxetine	approved	CNCCC(OC1=CC=C(C=C1)C(F)(F)F)C1=CC=CC=C1
DB00473	Hexylcaine	approved	CC(CNC1CCCCC1)OC(=O)C1=CC=CC=C1
DB00474	Methohexital	approved	CCC#CC(C)C1(CC=C)C(=O)NC(=O)N(C)C1=O
DB00475	Chlordiazepoxide	approved	CNC1=NC2=C(C=C(Cl)C=C2)C(C2=CC=CC=C2)=[N+]([O-])C1
DB00476	Duloxetine	approved	CNCC[C@H](OC1=CC=CC2=CC=CC=C12)C1=CC=CS1
DB00477	Chlorpromazine	approved	CN(C)CCCN1C2=CC=CC=C2SC2=C1C=C(Cl)C=C2
DB00478	Rimantadine	approved	CC(N)C12CC3CC(CC(C3)C1)C2
DB00479	Amikacin	approved	NCC[C@H](O)C(=O)N[C@@H]1C[C@H](N)[C@@H](O[C@H]2O[C@H](CN)[C@@H](O)[C@H](O)[C@H]2O)[C@H](O)[C@H]1O[C@H]1O[C@H](CO)[C@@H](O)[C@H](N)[C@H]1O
DB00480	Lenalidomide	approved	NC1=CC=CC2=C1CN(C1CCC(=O)NC1=O)C2=O
DB00481	Raloxifene	approved	OC1=CC=C(C=C1)C1=C(C(=O)C2=CC=C(OCCN3CCCCC3)C=C2)C2=C(S1)C=C(O)C=C2
DB00482	Celecoxib	approved	CC1=CC=C(C=C1)C1=CC(=NN1C1=CC=C(C=C1)S(N)(=O)=O)C(F)(F)F
DB00483	Gallamine triethiodide	approved	[I-].[I-].[I-].CC[N+](CC)(CC)CCOC1=CC=CC(OCC[N+](CC)(CC)CC)=C1OCC[N+](CC)(CC)CC
DB00484	Brimonidine	approved	BrC1=C(NC2=NCCN2)C=CC2=NC=CN=C12
DB00485	Dicloxacillin	approved	[H][C@]12SC(C)(C)[C@@H](N1C(=O)[C@H]2NC(=O)C1=C(C)ON=C1C1=C(Cl)C=CC=C1Cl)C(O)=O
DB00486	Nabilone	approved	[H][C@@]12CC(=O)CC[C@@]1([H])C(C)(C)OC1=CC(=CC(O)=C21)C(C)(C)CCCCCC
DB00487	Pefloxacin	approved	CCN1C=C(C(O)=O)C(=O)C2=CC(F)=C(C=C12)N1CCN(C)CC1
DB00488	Altretamine	approved	CN(C)C1=NC(=NC(=N1)N(C)C)N(C)C
DB00489	Sotalol	approved	CC(C)NCC(O)C1=CC=C(NS(C)(=O)=O)C=C1
DB00490	Buspirone	approved	O=C1CC2(CCCC2)CC(=O)N1CCCCN1CCN(CC1)C1=NC=CC=N1
DB00491	Miglitol	approved	OCCN1C[C@H](O)[C@@H](O)[C@H](O)[C@H]1CO
DB00492	Fosinopril	approved	CCC(=O)O[C@@H](OP(=O)(CCCCC1=CC=CC=C1)CC(=O)N1C[C@@H](C[C@H]1C(O)=O)C1CCCCC1)C(C)C
DB00493	Cefotaxime	approved	[H][C@]12SCC(COC(C)=O)=C(N1C(=O)[C@H]2NC(=O)C(=N/OC)\C1=CSC(N)=N1)C(O)=O
DB00494	Entacapone	approved	CCN(CC)C(=O)C(=C\C1=CC(=C(O)C(O)=C1)[N+]([O-])=O)\C#N
DB00495	Zidovudine	approved	CC1=CN([C@H]2C[C@H](N=[N+]=[N-])[C@@H](CO)O2)C(=O)NC1=O
DB00496	Darifenacin	approved	NC(=O)C([C@@H]1CCN(CCC2=CC3=C(OCC3)C=C2)C1)(C1=CC=CC=C1)C1=CC=CC=C1
DB00497	Oxycodone	approved	COC1=C2O[C@H]3C(=O)CC[C@@]4(O)[C@H]5CC(C=C1)=C2[C@@]34CCN5C
DB00498	Phenindione	approved	O=C1C(C(=O)C2=CC=CC=C12)C1=CC=CC=C1
DB00499	Flutamide	approved	CC(C)C(=O)NC1=CC(=C(C=C1)[N+]([O-])=O)C(F)(F)F
DB00500	Tolmetin	approved	CN1C(CC(O)=O)=CC=C1C(=O)C1=CC=C(C)C=C1
DB00501	Cimetidine	approved	CN\C(NCCSCC1=C(C)NC=N1)=N\C#N
DB00502	Haloperidol	approved	OC1(CCN(CCCC(=O)C2=CC=C(F)C=C2)CC1)C1=CC=C(Cl)C=C1
DB00503	Ritonavir	approved	CC(C)[C@H](NC(=O)N(C)CC1=CSC(=N1)C(C)C)C(=O)N[C@H](C[C@H](O)[C@H](CC1=CC=CC=C1)NC(=O)OCC1=CN=CS1)CC1=CC=CC=C1
DB00504	Levallorphan	approved	[H][C@@]12CCCC[C@@]11CCN(CC=C)[C@@H]2CC2=C1C=C(O)C=C2
DB00507	Nitazoxanide	approved	CC(=O)OC1=CC=CC=C1C(=O)NC1=NC=C(S1)[N+]([O-])=O
DB00508	Triflupromazine	approved	CN(C)CCCN1C2=CC=CC=C2SC2=C1C=C(C=C2)C(F)(F)F
DB00509	Dextrothyroxine	approved	N[C@H](CC1=CC(I)=C(OC2=CC(I)=C(O)C(I)=C2)C(I)=C1)C(O)=O
DB00511	Acetyldigitoxin	approved	[H][C@@]1(CC[C@]2(O)[C@]3([H])CC[C@]4([H])C[C@H](CC[C@]4(C)[C@@]3([H])CC[C@]12C)O[C@H]1C[C@H](O)[C@H](O[C@H]2C[C@H](O)[C@H](O[C@H]3C[C@H](OC(C)=O)[C@H](O)[C@@H](C)O3)[C@@H](C)O2)[C@@H](C)O1)C1=CC(=O)OC1
DB00512	Vancomycin	approved	CN[C@H](CC(C)C)C(=O)N[C@@H]1[C@H](O)C2=CC=C(OC3=C(O[C@@H]4O[C@H](CO)[C@@H](O)[C@H](O)[C@H]4O[C@H]4C[C@](C)(N)[C@H](O)[C@H](C)O4)C4=CC(=C3)[C@@H](NC(=O)[C@H](CC(N)=O)NC1=O)C(=O)N[C@@H]1C3=CC(=C(O)C=C3)C3=C(O)C=C(O)C=C3[C@H](NC(=O)[C@@H](NC1=O)[C@H](O)C1=CC(Cl)=C(O4)C=C1)C(O)=O)C(Cl)=C2
DB00513	Aminocaproic acid	approved	NCCCCCC(O)=O
DB00514	Dextromethorphan	approved	[H][C@]12CCCC[C@]11CCN(C)[C@H]2CC2=C1C=C(OC)C=C2
DB00515	Cisplatin	approved	[H][N]([H])([H])[Pt](Cl)(Cl)[N]([H])([H])[H]
DB00517	Anisotropine methylbromide	approved	[Br-].CCCC(CCC)C(=O)O[C@H]1CC2CCC(C1)[N+]2(C)C
DB00518	Albendazole	approved	CCCSC1=CC2=C(C=C1)N=C(NC(=O)OC)N2
DB00519	Trandolapril	approved	[H][C@@]12C[C@H](N(C(=O)[C@H](C)N[C@@H](CCC3=CC=CC=C3)C(=O)OCC)[C@@]1([H])CCCC2)C(O)=O
DB00520	Caspofungin	approved	[H][C@@]12C[C@@H](O)CN1C(=O)[C@@H](NC(=O)[C@]([H])(C[C@@H](O)[C@@H](NCCN)NC(=O)[C@@H]1[C@@H](O)CCN1C(=O)[C@@H](NC(=O)[C@@H](NC2=O)[C@H](O)[C@@H](O)C1=CC=C(O)C=C1)[C@H](O)CCN)NC(=O)CCCCCCCC[C@@H](C)C[C@@H](C)CC)[C@@H](C)O
DB00521	Carteolol	approved	CC(C)(C)NCC(O)COC1=CC=CC2=C1CCC(=O)N2
DB00523	Alitretinoin	approved	C\C(\C=C\C1=C(C)CCCC1(C)C)=C\C=C\C(\C)=C\C(O)=O
DB00524	Metolazone	approved	CC1NC2=CC(Cl)=C(C=C2C(=O)N1C1=CC=CC=C1C)S(N)(=O)=O
DB00525	Tolnaftate	approved	CN(C(=S)OC1=CC2=CC=CC=C2C=C1)C1=CC=CC(C)=C1
DB00526	Oxaliplatin	approved	[H][N]1([H])[C@@H]2CCCC[C@H]2[N]([H])([H])[Pt]11OC(=O)C(=O)O1
DB00527	Cinchocaine	approved	CCCCOC1=NC2=CC=CC=C2C(=C1)C(=O)NCCN(CC)CC
DB00528	Lercanidipine	approved	COC(=O)C1=C(C)NC(C)=C(C1C1=CC(=CC=C1)[N+]([O-])=O)C(=O)OC(C)(C)CN(C)CCC(C1=CC=CC=C1)C1=CC=CC=C1
DB00529	Foscarnet	approved	OC(=O)P(O)(O)=O
DB00530	Erlotinib	approved	COCCOC1=CC2=C(C=C1OCCOC)C(NC1=CC(=CC=C1)C#C)=NC=N2
DB00531	Cyclophosphamide	approved	ClCCN(CCCl)P1(=O)NCCCO1
DB00532	Mephenytoin	approved	CCC1(NC(=O)N(C)C1=O)C1=CC=CC=C1
DB00533	Rofecoxib	approved	CS(=O)(=O)C1=CC=C(C=C1)C1=C(C(=O)OC1)C1=CC=CC=C1
DB00534	Chlormerodrin	approved	COC(CNC(N)=O)C[Hg]Cl
DB00535	Cefdinir	approved	[H][C@]12SCC(C=C)=C(N1C(=O)[C@H]2NC(=O)C(=N/O)\C1=CSC(N)=N1)C(O)=O
DB00536	Guanidine	approved	NC(N)=N
DB00537	Ciprofloxacin	approved	OC(=O)C1=CN(C2CC2)C2=CC(N3CCNCC3)=C(F)C=C2C1=O
DB00538	Gadoversetamide	approved	[Gd+3].COCCNC(=O)CN(CCN(CCN(CC([O-])=O)CC(=O)NCCOC)CC([O-])=O)CC([O-])=O
DB00539	Toremifene	approved	CN(C)CCOC1=CC=C(C=C1)C(=C(\CCCl)C1=CC=CC=C1)\C1=CC=CC=C1
DB00540	Nortriptyline	approved	CNCCC=C1C2=CC=CC=C2CCC2=CC=CC=C12
DB00541	Vincristine	approved	[H][C@@]12N3CC[C@@]11C4=C(C=C(OC)C(=C4)[C@]4(C[C@H]5C[N@](C[C@](O)(CC)C5)CCC5=C4NC4=CC=CC=C54)C(=O)OC)N(C=O)[C@@]1([H])[C@](O)([C@H](OC(C)=O)[C@]2(CC)C=CC3)C(=O)OC
DB00542	Benazepril	approved	[H][C@@]1(CCC2=CC=CC=C2N(CC(O)=O)C1=O)N[C@@H](CCC1=CC=CC=C1)C(=O)OCC
DB00543	Amoxapine	approved	ClC1=CC2=C(OC3=CC=CC=C3N=C2N2CCNCC2)C=C1
DB00544	Fluorouracil	approved	FC1=CNC(=O)NC1=O
DB00545	Pyridostigmine	approved	CN(C)C(=O)OC1=C[N+](C)=CC=C1
DB00547	Desoximetasone	approved	[H][C@@]12C[C@@H](C)[C@H](C(=O)CO)[C@@]1(C)C[C@H](O)[C@@]1(F)[C@@]2([H])CCC2=CC(=O)C=C[C@]12C
DB00548	Azelaic acid	approved	OC(=O)CCCCCCCC(O)=O
DB00549	Zafirlukast	approved	COC1=CC(=CC=C1CC1=CN(C)C2=C1C=C(NC(=O)OC1CCCC1)C=C2)C(=O)NS(=O)(=O)C1=CC=CC=C1C
DB00550	Propylthiouracil	approved	CCCC1=CC(=O)NC(=S)N1
DB00551	Acetohydroxamic acid	approved	CC(=O)NO
DB00552	Pentostatin	approved	OC[C@H]1O[C@H](C[C@@H]1O)N1C=NC2=C1N=CNC[C@H]2O
DB00553	Methoxsalen	approved	COC1=C2OC(=O)C=CC2=CC2=C1OC=C2
DB00554	Piroxicam	approved	CN1C(C(=O)NC2=NC=CC=C2)=C(O)C2=C(C=CC=C2)S1(=O)=O
DB00555	Lamotrigine	approved	NC1=NC(N)=C(N=N1)C1=C(Cl)C(Cl)=CC=C1
DB00556	Perflutren	approved	FC(F)(F)C(F)(F)C(F)(F)F
DB00557	Hydroxyzine	approved	OCCOCCN1CCN(CC1)C(C1=CC=CC=C1)C1=CC=C(Cl)C=C1
DB00558	Zanamivir	approved	[H][C@]1(OC(=C[C@H](N=C(N)N)[C@H]1NC(C)=O)C(O)=O)[C@H](O)[C@H](O)CO
DB00559	Bosentan	approved	COC1=CC=CC=C1OC1=C(NS(=O)(=O)C2=CC=C(C=C2)C(C)(C)C)N=C(N=C1OCCO)C1=NC=CC=N1
DB00560	Tigecycline	approved	[H][C@@]12CC3=C(C(O)=C(NC(=O)CNC(C)(C)C)C=C3N(C)C)C(=O)C1=C(O)[C@]1(O)C(=O)C(C(N)=O)=C(O)[C@@H](N(C)C)[C@]1([H])C2
DB00561	Doxapram	approved	CCN1CC(CCN2CCOCC2)C(C1=O)(C1=CC=CC=C1)C1=CC=CC=C1
DB00562	Benzthiazide	approved	NS(=O)(=O)C1=CC2=C(C=C1Cl)N=C(CSCC1=CC=CC=C1)NS2(=O)=O
DB00563	Methotrexate	approved	CN(CC1=CN=C2N=C(N)N=C(N)C2=N1)C1=CC=C(C=C1)C(=O)N[C@@H](CCC(O)=O)C(O)=O
DB00564	Carbamazepine	approved	NC(=O)N1C2=CC=CC=C2C=CC2=CC=CC=C12
DB00565	Cisatracurium	approved	COC1=CC2=C(C=C1OC)[C@@H](CC1=CC(OC)=C(OC)C=C1)[N@@+](C)(CCC(=O)OCCCCCOC(=O)CC[N@@+]1(C)CCC3=C(C=C(OC)C(OC)=C3)[C@H]1CC1=CC(OC)=C(OC)C=C1)CC2
DB00566	Succimer	approved	OC(=O)[C@@H](S)[C@@H](S)C(O)=O
DB00567	Cephalexin	approved	[H][C@]12SCC(C)=C(N1C(=O)[C@H]2NC(=O)[C@H](N)C1=CC=CC=C1)C(O)=O
DB00568	Cinnarizine	approved	C(\C=C\C1=CC=CC=C1)N1CCN(CC1)C(C1=CC=CC=C1)C1=CC=CC=C1
DB00569	Fondaparinux	approved	CO[C@H]1O[C@H](COS(O)(=O)=O)[C@@H](O[C@@H]2O[C@H]([C@@H](O[C@H]3O[C@H](COS(O)(=O)=O)[C@@H](O[C@@H]4O[C@@H]([C@@H](O[C@H]5O[C@H](COS(O)(=O)=O)[C@@H](O)[C@H](O)[C@H]5NS(O)(=O)=O)[C@H](O)[C@H]4O)C(O)=O)[C@H](OS(O)(=O)=O)[C@H]3NS(O)(=O)=O)[C@H](O)[C@H]2OS(O)(=O)=O)C(O)=O)[C@H](O)[C@H]1NS(O)(=O)=O
DB00570	Vinblastine	approved	[H][C@@]12N(C)C3=CC(OC)=C(C=C3[C@@]11CCN3CC=C[C@@](CC)([C@@H](OC(C)=O)[C@]2(O)C(=O)OC)[C@@]13[H])[C@]1(C[C@@]2([H])CN(C[C@](O)(CC)C2)CCC2=C1NC1=C2C=CC=C1)C(=O)OC
DB00571	Propranolol	approved	CC(C)NCC(O)COC1=CC=CC2=C1C=CC=C2
DB00572	Atropine	approved	CN1[C@H]2CC[C@@H]1C[C@@H](C2)OC(=O)C(CO)C1=CC=CC=C1
DB00573	Fenoprofen	approved	CC(C(O)=O)C1=CC(OC2=CC=CC=C2)=CC=C1
DB00574	Fenfluramine	approved	CCNC(C)CC1=CC=CC(=C1)C(F)(F)F
DB00575	Clonidine	approved	ClC1=CC=CC(Cl)=C1NC1=NCCN1
DB00576	Sulfamethizole	approved	CC1=NN=C(NS(=O)(=O)C2=CC=C(N)C=C2)S1
DB00577	Valaciclovir	approved	CC(C)[C@H](N)C(=O)OCCOCN1C=NC2=C1NC(N)=NC2=O
DB00578	Carbenicillin	approved	[H][C@]12SC(C)(C)[C@@H](N1C(=O)[C@H]2NC(=O)C(C(O)=O)C1=CC=CC=C1)C(O)=O
DB00579	Mazindol	approved	OC1(N2CCN=C2C2=CC=CC=C12)C1=CC=C(Cl)C=C1
DB00580	Valdecoxib	approved	CC1=C(C(=NO1)C1=CC=CC=C1)C1=CC=C(C=C1)S(N)(=O)=O
DB00581	Lactulose	approved	OC[C@H]1O[C@](O)(CO)[C@@H](O)[C@@H]1O[C@@H]1O[C@H](CO)[C@H](O)[C@H](O)[C@H]1O
DB00582	Voriconazole	approved	C[C@@H](C1=NC=NC=C1F)[C@](O)(CN1C=NC=N1)C1=C(F)C=C(F)C=C1
DB00583	Levocarnitine	approved	C[N+](C)(C)C[C@H](O)CC([O-])=O
DB00584	Enalapril	approved	CCOC(=O)[C@H](CCC1=CC=CC=C1)N[C@@H](C)C(=O)N1CCC[C@H]1C(O)=O
DB00585	Nizatidine	approved	CNC(NCCSCC1=CSC(CN(C)C)=N1)=C[N+]([O-])=O
DB00586	Diclofenac	approved	OC(=O)CC1=CC=CC=C1NC1=C(Cl)C=CC=C1Cl
DB00588	Fluticasone propionate	approved	[H][C@@]12C[C@@H](C)[C@](OC(=O)CC)(C(=O)SCF)[C@@]1(C)C[C@H](O)[C@@]1(F)[C@@]2([H])C[C@H](F)C2=CC(=O)C=C[C@]12C
DB00589	Lisuride	approved	[H][C@@]12CC3=CNC4=CC=CC(=C34)C1=C[C@@H](CN2C)NC(=O)N(CC)CC
DB00590	Doxazosin	approved	COC1=C(OC)C=C2C(N)=NC(=NC2=C1)N1CCN(CC1)C(=O)C1COC2=CC=CC=C2O1
DB00591	Fluocinolone acetonide	approved	[H][C@@]12C[C@@]3([H])[C@]4([H])C[C@H](F)C5=CC(=O)C=C[C@]5(C)[C@@]4(F)[C@@H](O)C[C@]3(C)[C@@]1(OC(C)(C)O2)C(=O)CO
DB00592	Piperazine	approved	C1CNCCN1
DB00593	Ethosuximide	approved	CCC1(C)CC(=O)NC1=O
DB00594	Amiloride	approved	NC(=N)NC(=O)C1=NC(Cl)=C(N)N=C1N
DB00595	Oxytetracycline	approved	[H][C@@]12[C@@H](O)[C@@]3([H])C(C(=O)C4=C(C=CC=C4O)[C@@]3(C)O)=C(O)[C@]1(O)C(=O)C(C(N)=O)=C(O)[C@H]2N(C)C
DB00596	Ulobetasol	approved	[H][C@@]12C[C@H](C)[C@](O)(C(=O)CCl)[C@@]1(C)C[C@H](O)[C@@]1(F)[C@@]2([H])C[C@H](F)C2=CC(=O)C=C[C@]12C
DB00597	Gadoteridol	approved	[Gd+3].CC(O)CN1CCN(CC([O-])=O)CCN(CC([O-])=O)CCN(CC([O-])=O)CC1
DB00598	Labetalol	approved	CC(CCC1=CC=CC=C1)NCC(O)C1=CC(C(N)=O)=C(O)C=C1
DB00599	Thiopental	approved	CCCC(C)C1(CC)C(=O)NC(=S)NC1=O
DB00600	Monobenzone	approved	OC1=CC=C(OCC2=CC=CC=C2)C=C1
DB00601	Linezolid	approved	CC(=O)NC[C@H]1CN(C(=O)O1)C1=CC(F)=C(C=C1)N1CCOCC1
DB00602	Ivermectin	approved	[H][C@@]12OC\C3=C/C=C/[C@H](C)[C@H](O[C@H]4C[C@H](OC)[C@@H](O[C@H]5C[C@H](OC)[C@@H](O)[C@H](C)O5)[C@H](C)O4)\C(C)=C\C[C@]4([H])C[C@@]([H])(C[C@]5(CC[C@H](C)[C@]([H])(O5)C(C)C)O4)OC(=O)[C@]([H])(C=C(C)[C@H]1O)[C@@]23O.[H][C@@]12OC\C3=C/C=C/[C@H](C)[C@H](O[C@H]4C[C@H](OC)[C@@H](O[C@H]5C[C@H](OC)[C@@H](O)[C@H](C)O5)[C@H](C)O4)\C(C)=C\C[C@]4([H])C[C@@]([H])(C[C@]5(CC[C@H](C)[C@]([H])(O5)[C@@H](C)CC)O…
DB00603	Medroxyprogesterone acetate	approved	[H][C@@]12CC[C@](OC(C)=O)(C(C)=O)[C@@]1(C)CC[C@@]1([H])[C@@]2([H])C[C@H](C)C2=CC(=O)CC[C@]12C
DB00604	Cisapride	approved	CO[C@H]1CN(CCCOC2=CC=C(F)C=C2)CC[C@H]1NC(=O)C1=CC(Cl)=C(N)C=C1OC
DB00605	Sulindac	approved	CC1=C(CC(O)=O)C2=CC(F)=CC=C2\C1=C/C1=CC=C(C=C1)S(C)=O
DB00606	Cyclothiazide	approved	NS(=O)(=O)C1=C(Cl)C=C2NC(NS(=O)(=O)C2=C1)C1CC2CC1C=C2
DB00607	Nafcillin	approved	[H][C@]12SC(C)(C)[C@@H](N1C(=O)[C@H]2NC(=O)C1=C(OCC)C=CC2=CC=CC=C12)C(O)=O
DB00608	Chloroquine	approved	CCN(CC)CCCC(C)NC1=CC=NC2=CC(Cl)=CC=C12
DB00609	Ethionamide	approved	CCC1=NC=CC(=C1)C(N)=S
DB00610	Metaraminol	approved	C[C@H](N)[C@H](O)C1=CC(O)=CC=C1
DB00611	Butorphanol	approved	[H][C@@]12CC3=C(C=C(O)C=C3)[C@]3(CCCC[C@@]13O)CCN2CC1CCC1
DB00612	Bisoprolol	approved	CC(C)NCC(O)COC1=CC=C(COCCOC(C)C)C=C1
DB00613	Amodiaquine	approved	CCN(CC)CC1=C(O)C=CC(NC2=C3C=CC(Cl)=CC3=NC=C2)=C1
DB00615	Rifabutin	approved	CO[C@H]1\C=C\O[C@@]2(C)OC3=C(C2=O)C2=C(C(O)=C3C)C(=O)C(NC(=O)\C(C)=C/C=C/[C@H](C)[C@H](O)[C@@H](C)[C@@H](O)[C@@H](C)[C@H](OC(C)=O)[C@@H]1C)=C1NC3(CCN(CC3)CC(C)C)N=C21
DB00617	Paramethadione	approved	CCC1(C)OC(=O)N(C)C1=O
DB00618	Demeclocycline	approved	[H][C@]12C[C@@]3([H])[C@H](N(C)C)C(O)=C(C(N)=O)C(=O)[C@@]3(O)C(O)=C1C(=O)C1=C([C@H]2O)C(Cl)=CC=C1O
DB00619	Imatinib	approved	CN1CCN(CC2=CC=C(C=C2)C(=O)NC2=CC(NC3=NC=CC(=N3)C3=CN=CC=C3)=C(C)C=C2)CC1
DB00620	Triamcinolone	approved	[H][C@@]12C[C@@H](O)[C@](O)(C(=O)CO)[C@@]1(C)C[C@H](O)[C@@]1(F)[C@@]2([H])CCC2=CC(=O)C=C[C@]12C
DB00621	Oxandrolone	approved	[H][C@@]12CC[C@](C)(O)[C@@]1(C)CC[C@@]1([H])[C@@]2([H])CC[C@@]2([H])CC(=O)OC[C@]12C
DB00622	Nicardipine	approved	COC(=O)C1=C(C)NC(C)=C(C1C1=CC(=CC=C1)[N+]([O-])=O)C(=O)OCCN(C)CC1=CC=CC=C1
DB00623	Fluphenazine	approved	OCCN1CCN(CCCN2C3=CC=CC=C3SC3=C2C=C(C=C3)C(F)(F)F)CC1
DB00624	Testosterone	approved	[H][C@@]12CC[C@H](O)[C@@]1(C)CC[C@@]1([H])[C@@]2([H])CCC2=CC(=O)CC[C@]12C
DB00625	Efavirenz	approved	FC(F)(F)[C@]1(OC(=O)NC2=C1C=C(Cl)C=C2)C#CC1CC1
DB00626	Bacitracin	approved	CC[C@H](C)[C@H](N)C1=N[C@@H](CS1)C(=O)N[C@@H](CC(C)C)C(=O)N[C@H](CCC(O)=O)C(=O)N[C@@H]([C@@H](C)CC)C(=O)N[C@H]1CCCCNC(=O)[C@H](CC(N)=O)NC(=O)[C@@H](CC(O)=O)NC(=O)[C@H](CC2=CNC=N2)NC(=O)[C@@H](CC2=CC=CC=C2)NC(=O)[C@@H](NC(=O)[C@@H](CCCN)NC1=O)[C@@H](C)CC
DB00627	Niacin	approved	OC(=O)C1=CN=CC=C1
DB00628	Clorazepic acid	approved	OC(=O)C1N=C(C2=CC=CC=C2)C2=C(NC1=O)C=CC(Cl)=C2
DB00629	Guanabenz	approved	NC(N)=NN=CC1=C(Cl)C=CC=C1Cl
DB00630	Alendronic acid	approved	NCCCC(O)(P(O)(O)=O)P(O)(O)=O
DB00631	Clofarabine	approved	[H][C@]1(F)[C@H](O)[C@@H](CO)O[C@H]1N1C=NC2=C(N)N=C(Cl)N=C12
DB00632	Docosanol	approved	CCCCCCCCCCCCCCCCCCCCCCO
DB00633	Dexmedetomidine	approved	C[C@H](C1=CNC=N1)C1=C(C)C(C)=CC=C1
DB00634	Sulfacetamide	approved	CC(=O)NS(=O)(=O)C1=CC=C(N)C=C1
DB00635	Prednisone	approved	[H][C@@]12CC[C@](O)(C(=O)CO)[C@@]1(C)CC(=O)[C@@]1([H])[C@@]2([H])CCC2=CC(=O)C=C[C@]12C
DB00636	Clofibrate	approved	CCOC(=O)C(C)(C)OC1=CC=C(Cl)C=C1
DB00637	Astemizole	approved	COC1=CC=C(CCN2CCC(CC2)NC2=NC3=CC=CC=C3N2CC2=CC=C(F)C=C2)C=C1
DB00639	Butoconazole	approved	ClC1=CC=C(CCC(CN2C=CN=C2)SC2=C(Cl)C=CC=C2Cl)C=C1
DB00640	Adenosine	approved	NC1=C2N=CN([C@@H]3O[C@H](CO)[C@@H](O)[C@H]3O)C2=NC=N1
DB00641	Simvastatin	approved	[H][C@]12[C@H](C[C@@H](C)C=C1C=C[C@H](C)[C@@H]2CC[C@@H]1C[C@@H](O)CC(=O)O1)OC(=O)C(C)(C)CC
DB00642	Pemetrexed	approved	NC1=NC(=O)C2=C(NC=C2CCC2=CC=C(C=C2)C(=O)N[C@@H](CCC(O)=O)C(O)=O)N1
DB00643	Mebendazole	approved	COC(=O)NC1=NC2=C(N1)C=C(C=C2)C(=O)C1=CC=CC=C1
DB00644	Gonadorelin	approved	CC(C)CC(NC(=O)CNC(=O)C(CC1=CC=C(O)C=C1)NC(=O)C(CO)NC(=O)C(CC1=CNC2=CC=CC=C12)NC(=O)C(CC1=CN=CN1)NC(=O)C1CCC(=O)N1)C(=O)NC(CCCN=C(N)N)C(=O)N1CCCC1C(=O)NCC(N)=O
DB00645	Dyclonine	approved	CCCCOC1=CC=C(C=C1)C(=O)CCN1CCCCC1
DB00646	Nystatin	approved	[H][C@]12C[C@@H](O[C@@H]3O[C@H](C)[C@@H](O)[C@H](N)[C@@H]3O)\C=C\C=C\C=C\C=C\CC\C=C\C=C\[C@H](C)[C@@H](O)[C@@H](C)[C@H](C)OC(=O)C[C@H](O)C[C@H](O)C[C@H](O)CC[C@@H](O)[C@H](O)C[C@](O)(C[C@H](O)[C@H]1C(O)=O)O2
DB00647	Dextropropoxyphene	approved	CCC(=O)O[C@@](CC1=CC=CC=C1)([C@H](C)CN(C)C)C1=CC=CC=C1
DB00648	Mitotane	approved	ClC(Cl)C(C1=CC=C(Cl)C=C1)C1=CC=CC=C1Cl
DB00649	Stavudine	approved	CC1=CN([C@@H]2O[C@H](CO)C=C2)C(=O)NC1=O
DB00650	Leucovorin	approved	[H]C(=O)N1C(CNC2=CC=C(C=C2)C(=O)N[C@@H](CCC(O)=O)C(O)=O)CNC2=C1C(=O)NC(N)=N2
DB00651	Dyphylline	approved	CN1C2=C(N(CC(O)CO)C=N2)C(=O)N(C)C1=O
DB00652	Pentazocine	approved	CC1C2CC3=C(C=C(O)C=C3)C1(C)CCN2CC=C(C)C
DB00653	Magnesium sulfate	approved	[Mg++].[O-]S([O-])(=O)=O
DB00654	Latanoprost	approved	CC(C)OC(=O)CCC\C=C/C[C@H]1[C@@H](O)C[C@@H](O)[C@@H]1CC[C@@H](O)CCC1=CC=CC=C1
DB00655	Estrone	approved	[H][C@@]12CCC(=O)[C@@]1(C)CC[C@]1([H])C3=C(CC[C@@]21[H])C=C(O)C=C3
DB00656	Trazodone	approved	ClC1=CC=CC(=C1)N1CCN(CCCN2N=C3C=CC=CN3C2=O)CC1
DB00657	Mecamylamine	approved	CNC1(C)C2CCC(C2)C1(C)C
DB00658	Sevelamer	approved	NCC=C.ClCC1CO1
DB00659	Acamprosate	approved	CC(=O)NCCCS(O)(=O)=O
DB00660	Metaxalone	approved	CC1=CC(OCC2CNC(=O)O2)=CC(C)=C1
DB00661	Verapamil	approved	COC1=C(OC)C=C(CCN(C)CCCC(C#N)(C(C)C)C2=CC(OC)=C(OC)C=C2)C=C1
DB00662	Trimethobenzamide	approved	COC1=CC(=CC(OC)=C1OC)C(=O)NCC1=CC=C(OCCN(C)C)C=C1
DB00663	Flumethasone	approved	[H][C@@]12C[C@@H](C)[C@](O)(C(=O)CO)[C@@]1(C)C[C@H](O)[C@@]1(F)[C@@]2([H])C[C@H](F)C2=CC(=O)C=C[C@]12C
DB00664	Sulfametopyrazine	approved	COC1=NC=CN=C1NS(=O)(=O)C1=CC=C(N)C=C1
DB00665	Nilutamide	approved	CC1(C)NC(=O)N(C1=O)C1=CC(=C(C=C1)[N+]([O-])=O)C(F)(F)F
DB00666	Nafarelin	approved	CC(C)C[C@H](NC(=O)[C@@H](CC1=CC2=C(C=CC=C2)C=C1)NC(=O)[C@H](CC1=CC=C(O)C=C1)NC(=O)[C@H](CO)NC(=O)[C@H](CC1=CNC2=CC=CC=C12)NC(=O)[C@H](CC1=CNC=N1)NC(=O)[C@@H]1CCC(=O)N1)C(=O)N[C@@H](CCCNC(N)=N)C(=O)N1CCC[C@H]1C(=O)NCC(N)=O
DB00668	Epinephrine	approved	CNC[C@H](O)C1=CC(O)=C(O)C=C1
DB00669	Sumatriptan	approved	CNS(=O)(=O)CC1=CC=C2NC=C(CCN(C)C)C2=C1
DB00670	Pirenzepine	approved	CN1CCN(CC(=O)N2C3=CC=CC=C3C(=O)NC3=C2N=CC=C3)CC1
DB00671	Cefixime	approved	[H][C@]12SCC(C=C)=C(N1C(=O)[C@H]2NC(=O)C(=N/OCC(O)=O)\C1=CSC(N)=N1)C(O)=O
DB00672	Chlorpropamide	approved	CCCNC(=O)NS(=O)(=O)C1=CC=C(Cl)C=C1
DB00673	Aprepitant	approved	C[C@@H](O[C@H]1OCCN(CC2=NNC(=O)N2)[C@H]1C1=CC=C(F)C=C1)C1=CC(=CC(=C1)C(F)(F)F)C(F)(F)F
DB00674	Galantamine	approved	[H][C@]12C[C@@H](O)C=C[C@]11CCN(C)CC3=C1C(O2)=C(OC)C=C3
DB00675	Tamoxifen	approved	CC\C(=C(/C1=CC=CC=C1)C1=CC=C(OCCN(C)C)C=C1)C1=CC=CC=C1
DB00676	Benzyl benzoate	approved	O=C(OCC1=CC=CC=C1)C1=CC=CC=C1
DB00677	Isoflurophate	approved	CC(C)OP(F)(=O)OC(C)C
DB00678	Losartan	approved	CCCCC1=NC(Cl)=C(CO)N1CC1=CC=C(C=C1)C1=CC=CC=C1C1=NNN=N1
DB00679	Thioridazine	approved	CSC1=CC2=C(SC3=CC=CC=C3N2CCC2CCCCN2C)C=C1
DB00680	Moricizine	approved	CCOC(=O)NC1=CC2=C(SC3=CC=CC=C3N2C(=O)CCN2CCOCC2)C=C1
DB00681	Amphotericin B	approved	[H][C@]12C[C@@H](O[C@@H]3O[C@H](C)[C@@H](O)[C@H](N)[C@@H]3O)\C=C\C=C\C=C\C=C\C=C\C=C\C=C\[C@H](C)[C@@H](O)[C@@H](C)[C@H](C)OC(=O)C[C@H](O)C[C@H](O)CC[C@@H](O)[C@H](O)C[C@H](O)C[C@](O)(C[C@H](O)[C@H]1C(O)=O)O2
DB00682	Warfarin	approved	CC(=O)CC(C1=CC=CC=C1)C1=C(O)C2=C(OC1=O)C=CC=C2
DB00683	Midazolam	approved	CC1=NC=C2CN=C(C3=CC=CC=C3F)C3=C(C=CC(Cl)=C3)N12
DB00684	Tobramycin	approved	NC[C@H]1O[C@H](O[C@@H]2[C@@H](N)C[C@@H](N)[C@H](O[C@H]3O[C@H](CO)[C@@H](O)[C@H](N)[C@H]3O)[C@H]2O)[C@H](N)C[C@@H]1O
DB00685	Trovafloxacin	approved	[H][C@@]12CN(C[C@]1([H])[C@H]2N)C1=NC2=C(C=C1F)C(=O)C(=CN2C1=C(F)C=C(F)C=C1)C(O)=O
DB00686	Pentosan polysulfate	approved	O[C@@H]1CO[C@@H](O[C@@H]2CO[C@@H](O)[C@H](OS(O)(=O)=O)[C@H]2OS(O)(=O)=O)[C@H](OS(O)(=O)=O)[C@H]1OS(O)(=O)=O
DB00687	Fludrocortisone	approved	[H][C@@]12CC[C@](O)(C(=O)CO)[C@@]1(C)C[C@H](O)[C@@]1(F)[C@@]2([H])CCC2=CC(=O)CC[C@]12C
DB00688	Mycophenolate mofetil	approved	COC1=C(C\C=C(/C)CCC(=O)OCCN2CCOCC2)C(O)=C2C(=O)OCC2=C1C
DB00689	Cephaloglycin	approved	[H][C@]12SCC(COC(C)=O)=C(N1C(=O)[C@H]2NC(=O)[C@H](N)C1=CC=CC=C1)C(O)=O
DB00690	Flurazepam	approved	CCN(CC)CCN1C2=C(C=C(Cl)C=C2)C(=NCC1=O)C1=CC=CC=C1F
DB00691	Moexipril	approved	CCOC(=O)[C@H](CCC1=CC=CC=C1)N[C@@H](C)C(=O)N1CC2=CC(OC)=C(OC)C=C2C[C@H]1C(O)=O
DB00692	Phentolamine	approved	CC1=CC=C(C=C1)N(CC1=NCCN1)C1=CC(O)=CC=C1
DB00693	Fluorescein	approved	OC1=CC=C2C(OC3=CC(O)=CC=C3C22OC(=O)C3=C2C=CC=C3)=C1
DB00694	Daunorubicin	approved	COC1=CC=CC2=C1C(=O)C1=C(O)C3=C(C[C@](O)(C[C@@H]3O[C@H]3C[C@H](N)[C@H](O)[C@H](C)O3)C(C)=O)C(O)=C1C2=O
DB00695	Furosemide	approved	NS(=O)(=O)C1=C(Cl)C=C(NCC2=CC=CO2)C(=C1)C(O)=O
DB00696	Ergotamine	approved	[H][C@@]12CCCN1C(=O)[C@H](CC1=CC=CC=C1)N1C(=O)[C@](C)(NC(=O)[C@H]3CN(C)[C@]4([H])CC5=CNC6=CC=CC(=C56)C4=C3)O[C@@]21O
DB00697	Tizanidine	approved	ClC1=C(NC2=NCCN2)C2=NSN=C2C=C1
DB00698	Nitrofurantoin	approved	[O-][N+](=O)C1=CC=C(O1)\C=N\N1CC(=O)NC1=O
DB00699	Nicergoline	approved	[H][C@@]12CC3=CN(C)C4=CC=CC(=C34)[C@]1(C[C@@H](COC(=O)C1=CN=CC(Br)=C1)CN2C)OC
DB00700	Eplerenone	approved	[H][C@@]12CC[C@@]3(CCC(=O)O3)[C@@]1(C)C[C@H]1O[C@@]11[C@@]2([H])[C@@H](CC2=CC(=O)CC[C@]12C)C(=O)OC
DB00701	Amprenavir	approved	CC(C)CN(C[C@@H](O)[C@H](CC1=CC=CC=C1)NC(=O)O[C@H]1CCOC1)S(=O)(=O)C1=CC=C(N)C=C1
DB00703	Methazolamide	approved	CN1N=C(S\C1=N\C(C)=O)S(N)(=O)=O
DB00704	Naltrexone	approved	[H][C@@]12OC3=C(O)C=CC4=C3[C@@]11CCN(CC3CC3)[C@]([H])(C4)[C@]1(O)CCC2=O
DB00705	Delavirdine	approved	CC(C)NC1=C(N=CC=C1)N1CCN(CC1)C(=O)C1=CC2=C(N1)C=CC(NS(C)(=O)=O)=C2
DB00706	Tamsulosin	approved	CCOC1=CC=CC=C1OCCN[C@H](C)CC1=CC(=C(OC)C=C1)S(N)(=O)=O
DB00708	Sufentanil	approved	CCC(=O)N(C1=CC=CC=C1)C1(COC)CCN(CCC2=CC=CS2)CC1
DB00709	Lamivudine	approved	NC1=NC(=O)N(C=C1)[C@@H]1CS[C@H](CO)O1
DB00710	Ibandronate	approved	CCCCCN(C)CCC(O)(P(O)(O)=O)P(O)(O)=O
DB00711	Diethylcarbamazine	approved	CCN(CC)C(=O)N1CCN(C)CC1
DB00712	Flurbiprofen	approved	CC(C(O)=O)C1=CC(F)=C(C=C1)C1=CC=CC=C1
DB00713	Oxacillin	approved	[H][C@]12SC(C)(C)[C@@H](N1C(=O)[C@H]2NC(=O)C1=C(C)ON=C1C1=CC=CC=C1)C(O)=O
DB00714	Apomorphine	approved	[H][C@]12CC3=C(C(O)=C(O)C=C3)C3=CC=CC(CCN1C)=C23
DB00715	Paroxetine	approved	FC1=CC=C(C=C1)[C@@H]1CCNC[C@H]1COC1=CC2=C(OCO2)C=C1
DB00716	Nedocromil	approved	CCCC1=C2N(CC)C(=CC(=O)C2=CC2=C1OC(=CC2=O)C(O)=O)C(O)=O
DB00717	Norethisterone	approved	[H][C@@]12CC[C@@](O)(C#C)[C@@]1(C)CC[C@]1([H])[C@@]3([H])CCC(=O)C=C3CC[C@@]21[H]
DB00718	Adefovir dipivoxil	approved	CC(C)(C)C(=O)OCOP(=O)(COCCN1C=NC2=C(N)N=CN=C12)OCOC(=O)C(C)(C)C
DB00719	Azatadine	approved	CN1CCC(CC1)=C1C2=CC=CC=C2CCC2=C1N=CC=C2
DB00720	Clodronic acid	approved	OP(O)(=O)C(Cl)(Cl)P(O)(O)=O
DB00721	Procaine	approved	CCN(CC)CCOC(=O)C1=CC=C(N)C=C1
DB00722	Lisinopril	approved	NCCCC[C@H](N[C@@H](CCC1=CC=CC=C1)C(O)=O)C(=O)N1CCC[C@H]1C(O)=O
DB00723	Methoxamine	approved	COC1=CC(C(O)C(C)N)=C(OC)C=C1
DB00724	Imiquimod	approved	CC(C)CN1C=NC2=C1C1=C(C=CC=C1)N=C2N
DB00725	Homatropine methylbromide	approved	[Br-].C[N+]1(C)C2CCC1CC(C2)OC(=O)C(O)C1=CC=CC=C1
DB00726	Trimipramine	approved	CC(CN(C)C)CN1C2=CC=CC=C2CCC2=CC=CC=C12
DB00727	Nitroglycerin	approved	[O-][N+](=O)OCC(CO[N+]([O-])=O)O[N+]([O-])=O
DB00728	Rocuronium	approved	[H][C@@]12C[C@@H]([C@H](OC(C)=O)[C@@]1(C)CC[C@@]1([H])[C@@]2([H])CC[C@@]2([H])C[C@H](O)[C@H](C[C@]12C)N1CCOCC1)[N+]1(CC=C)CCCC1
DB00730	Thiabendazole	approved	N1C2=CC=CC=C2N=C1C1=CSC=N1
DB00731	Nateglinide	approved	CC(C)[C@H]1CC[C@@H](CC1)C(=O)N[C@H](CC1=CC=CC=C1)C(O)=O
DB00732	Atracurium besylate	approved	[O-]S(=O)(=O)C1=CC=CC=C1.[O-]S(=O)(=O)C1=CC=CC=C1.COC1=CC2=C(C=C1OC)C(CC1=CC(OC)=C(OC)C=C1)[N+](C)(CCC(=O)OCCCCCOC(=O)CC[N+]1(C)CCC3=C(C=C(OC)C(OC)=C3)C1CC1=CC(OC)=C(OC)C=C1)CC2
DB00733	Pralidoxime	approved	C[N+]1=C(\C=N\O)C=CC=C1
DB00734	Risperidone	approved	CC1=C(CCN2CCC(CC2)C2=NOC3=C2C=CC(F)=C3)C(=O)N2CCCCC2=N1
DB00735	Naftifine	approved	CN(CC=CC1=CC=CC=C1)CC1=CC=CC2=CC=CC=C12
DB00736	Esomeprazole	approved	COC1=CC2=C(NC(=N2)[S@@](=O)CC2=NC=C(C)C(OC)=C2C)C=C1
DB00737	Meclizine	approved	CC1=CC(CN2CCN(CC2)C(C2=CC=CC=C2)C2=CC=C(Cl)C=C2)=CC=C1
DB00738	Pentamidine	approved	NC(=N)C1=CC=C(OCCCCCOC2=CC=C(C=C2)C(N)=N)C=C1
DB00739	Hetacillin	approved	[H][C@]12SC(C)(C)[C@@H](N1C(=O)[C@H]2N1C(=O)[C@H](NC1(C)C)C1=CC=CC=C1)C(O)=O
DB00740	Riluzole	approved	NC1=NC2=C(S1)C=C(OC(F)(F)F)C=C2
DB00741	Hydrocortisone	approved	[H][C@@]12CC[C@](O)(C(=O)CO)[C@@]1(C)C[C@H](O)[C@@]1([H])[C@@]2([H])CCC2=CC(=O)CC[C@]12C
DB00742	Mannitol	approved	OC[C@@H](O)[C@@H](O)[C@H](O)[C@H](O)CO
DB00743	Gadobenic acid	approved	[Gd+3].OC(=O)CN(CCN(CCN(CC([O-])=O)CC([O-])=O)CC([O-])=O)C(COCC1=CC=CC=C1)C(O)=O
DB00744	Zileuton	approved	CC(N(O)C(N)=O)C1=CC2=CC=CC=C2S1
DB00745	Modafinil	approved	NC(=O)CS(=O)C(C1=CC=CC=C1)C1=CC=CC=C1
DB00746	Deferoxamine	approved	CC(=O)N(O)CCCCCNC(=O)CCC(=O)N(O)CCCCCNC(=O)CCC(=O)N(O)CCCCCN
DB00747	Scopolamine	approved	CN1[C@H]2C[C@@H](C[C@@H]1[C@H]1O[C@@H]21)OC(=O)[C@H](CO)C1=CC=CC=C1
DB00748	Carbinoxamine	approved	CN(C)CCOC(C1=CC=C(Cl)C=C1)C1=CC=CC=N1
DB00749	Etodolac	approved	CCC1=C2NC3=C(CCOC3(CC)CC(O)=O)C2=CC=C1
DB00750	Prilocaine	approved	CCCNC(C)C(=O)NC1=CC=CC=C1C
DB00751	Epinastine	approved	NC1=NCC2N1C1=CC=CC=C1CC1=CC=CC=C21
DB00752	Tranylcypromine	approved	NC1CC1C1=CC=CC=C1
DB00753	Isoflurane	approved	FC(F)OC(Cl)C(F)(F)F
DB00754	Ethotoin	approved	CCN1C(=O)NC(C1=O)C1=CC=CC=C1
DB00755	Tretinoin	approved	C\C(\C=C\C1=C(C)CCCC1(C)C)=C/C=C/C(/C)=C/C(O)=O
DB00756	Hexachlorophene	approved	OC1=C(CC2=C(O)C(Cl)=CC(Cl)=C2Cl)C(Cl)=C(Cl)C=C1Cl
DB00757	Dolasetron	approved	[H][C@@]1(C[C@@]2([H])C[C@]3([H])C[C@@]([H])(C1)N2CC3=O)OC(=O)C1=CNC2=C1C=CC=C2
DB00758	Clopidogrel	approved	[H][C@@](N1CCC2=C(C1)C=CS2)(C(=O)OC)C1=CC=CC=C1Cl
DB00759	Tetracycline	approved	[H][C@@]12C[C@@]3([H])C(=C(O)[C@]1(O)C(=O)C(C(N)=O)=C(O)[C@H]2N(C)C)C(=O)C1=C(O)C=CC=C1[C@@]3(C)O
DB00760	Meropenem	approved	[H][C@]1([C@@H](C)O)C(=O)N2C(C(O)=O)=C(S[C@@H]3CN[C@@H](C3)C(=O)N(C)C)[C@H](C)[C@]12[H]
DB00761	Potassium chloride	approved	[Cl-].[K+]
DB00762	Irinotecan	approved	CCC1=C2CN3C(=CC4=C(COC(=O)[C@]4(O)CC)C3=O)C2=NC2=CC=C(OC(=O)N3CCC(CC3)N3CCCCC3)C=C12
DB00763	Methimazole	approved	CN1C=CNC1=S
DB00765	Metyrosine	approved	C[C@](N)(CC1=CC=C(O)C=C1)C(O)=O
DB00766	Clavulanic acid	approved	[H][C@@]12CC(=O)N1[C@@H](C(O)=O)\C(O2)=C\CO
DB00768	Olopatadine	approved	CN(C)CC\C=C1\C2=CC=CC=C2COC2=C1C=C(CC(O)=O)C=C2
DB00769	Hydrocortamate	approved	[H][C@@]12CC[C@](O)(C(=O)COC(=O)CN(CC)CC)[C@@]1(C)C[C@H](O)[C@@]1([H])[C@@]2([H])CCC2=CC(=O)CC[C@]12C
DB00770	Alprostadil	approved	CCCCC[C@H](O)\C=C\[C@H]1[C@H](O)CC(=O)[C@@H]1CCCCCCC(O)=O
DB00771	Clidinium	approved	C[N@@+]12CC[C@@H](CC1)C(C2)OC(=O)C(O)(C1=CC=CC=C1)C1=CC=CC=C1
DB00772	Malathion	approved	CCOC(=O)CC(SP(=S)(OC)OC)C(=O)OCC
DB00773	Etoposide	approved	[H][C@]12COC(=O)[C@]1([H])[C@H](C1=CC(OC)=C(O)C(OC)=C1)C1=CC3=C(OCO3)C=C1[C@H]2O[C@@H]1O[C@]2([H])CO[C@@H](C)O[C@@]2([H])[C@H](O)[C@H]1O
DB00774	Hydroflumethiazide	approved	NS(=O)(=O)C1=CC2=C(NCNS2(=O)=O)C=C1C(F)(F)F
DB00775	Tirofiban	approved	CCCCS(=O)(=O)N[C@@H](CC1=CC=C(OCCCCC2CCNCC2)C=C1)C(O)=O
DB00776	Oxcarbazepine	approved	NC(=O)N1C2=CC=CC=C2CC(=O)C2=C1C=CC=C2
DB00777	Propiomazine	approved	CCC(=O)C1=CC2=C(SC3=CC=CC=C3N2CC(C)N(C)C)C=C1
DB00778	Roxithromycin	approved	CC[C@H]1OC(=O)[C@H](C)[C@@H](O[C@H]2C[C@@](C)(OC)[C@@H](O)[C@H](C)O2)[C@H](C)[C@@H](O[C@@H]2O[C@H](C)C[C@@H]([C@H]2O)N(C)C)[C@](C)(O)C[C@@H](C)C(=NOCOCCOC)[C@H](C)[C@@H](O)[C@]1(C)O
DB00779	Nalidixic acid	approved	CCN1C=C(C(O)=O)C(=O)C2=C1N=C(C)C=C2
DB00780	Phenelzine	approved	NNCCC1=CC=CC=C1
DB00782	Propantheline	approved	CC(C)[N+](C)(CCOC(=O)C1C2=CC=CC=C2OC2=CC=CC=C12)C(C)C
DB00783	Estradiol	approved	[H][C@@]12CC[C@H](O)[C@@]1(C)CC[C@]1([H])C3=C(CC[C@@]21[H])C=C(O)C=C3
DB00784	Mefenamic acid	approved	CC1=C(C)C(NC2=CC=CC=C2C(O)=O)=CC=C1
DB00787	Acyclovir	approved	NC1=NC(=O)C2=C(N1)N(COCCO)C=N2
DB00788	Naproxen	approved	COC1=CC2=C(C=C1)C=C(C=C2)[C@H](C)C(O)=O
DB00789	Gadopentetic acid	approved	[Gd+3].OC(=O)CN(CCN(CCN(CC(O)=O)CC([O-])=O)CC([O-])=O)CC([O-])=O
DB00790	Perindopril	approved	[H][C@]12C[C@H](N(C(=O)[C@H](C)N[C@@H](CCC)C(=O)OCC)[C@@]1([H])CCCC2)C(O)=O
DB00791	Uracil mustard	approved	ClCCN(CCCl)C1=CNC(=O)NC1=O
DB00792	Tripelennamine	approved	CN(C)CCN(CC1=CC=CC=C1)C1=CC=CC=N1
DB00793	Haloprogin	approved	ClC1=CC(Cl)=C(Cl)C=C1OCC#CI
DB00794	Primidone	approved	CCC1(C(=O)NCNC1=O)C1=CC=CC=C1
DB00795	Sulfasalazine	approved	OC(=O)C1=CC(=CC=C1O)\N=N\C1=CC=C(C=C1)S(=O)(=O)NC1=NC=CC=C1
DB00796	Candesartan cilexetil	approved	CCOC1=NC2=C(N1CC1=CC=C(C=C1)C1=CC=CC=C1C1=NN=NN1)C(=CC=C2)C(=O)OC(C)OC(=O)OC1CCCCC1
DB00797	Tolazoline	approved	C(C1=NCCN1)C1=CC=CC=C1
DB00798	Gentamicin	approved	[H][C@@]1(CN)CC[C@@H](N)[C@@H](O[C@]2([H])[C@@H](N)C[C@@H](N)[C@H](O[C@@]3([H])OC[C@](C)(O)[C@H](NC)[C@H]3O)[C@H]2O)O1.[H][C@]1(CC[C@@H](N)[C@@H](O[C@]2([H])[C@@H](N)C[C@@H](N)[C@H](O[C@@]3([H])OC[C@](C)(O)[C@H](NC)[C@H]3O)[C@H]2O)O1)C(C)N.[H][C@]1(CC[C@@H](N)[C@@H](O[C@]2([H])[C@@H](N)C[C@@H](N)[C@H](O[C@@]3([H])OC[C@](C)(O)[C@H](NC)[C@H]3O)[C@H]2O)O1)C(C)NC
DB00799	Tazarotene	approved	CCOC(=O)C1=CN=C(C=C1)C#CC1=CC2=C(SCCC2(C)C)C=C1
DB00800	Fenoldopam	approved	OC1=CC=C(C=C1)C1CNCCC2=C(Cl)C(O)=C(O)C=C12
DB00801	Halazepam	approved	FC(F)(F)CN1C2=C(C=C(Cl)C=C2)C(=NCC1=O)C1=CC=CC=C1
DB00802	Alfentanil	approved	CCN1N=NN(CCN2CCC(COC)(CC2)N(C(=O)CC)C2=CC=CC=C2)C1=O
DB00803	Colistin	approved	CCC(C)CCCC(=O)N[C@@H](CCN)C(=O)N[C@@H]([C@@H](C)O)C(=O)N[C@@H](CCN)C(=O)N[C@H]1CCNC(=O)C(NC(=O)[C@@H](CCN)NC(=O)[C@H](CCN)NC(=O)[C@@H](CC(C)C)NC(=O)[C@@H](CC(C)C)NC(=O)[C@H](CCN)NC1=O)[C@@H](C)O
DB00804	Dicyclomine	approved	CCN(CC)CCOC(=O)C1(CCCCC1)C1CCCCC1
DB00805	Minaprine	approved	CC1=CC(=NN=C1NCCN1CCOCC1)C1=CC=CC=C1
DB00806	Pentoxifylline	approved	CN1C=NC2=C1C(=O)N(CCCCC(C)=O)C(=O)N2C
DB00807	Proparacaine	approved	CCCOC1=C(N)C=C(C=C1)C(=O)OCCN(CC)CC
DB00808	Indapamide	approved	CC1CC2=CC=CC=C2N1NC(=O)C1=CC(=C(Cl)C=C1)S(N)(=O)=O
DB00809	Tropicamide	approved	CCN(CC1=CC=NC=C1)C(=O)C(CO)C1=CC=CC=C1
DB00810	Biperiden	approved	OC(CCN1CCCCC1)(C1CC2CC1C=C2)C1=CC=CC=C1
DB00811	Ribavirin	approved	NC(=O)C1=NN(C=N1)[C@@H]1O[C@H](CO)[C@@H](O)[C@H]1O
DB00812	Phenylbutazone	approved	CCCCC1C(=O)N(N(C1=O)C1=CC=CC=C1)C1=CC=CC=C1
DB00813	Fentanyl	approved	CCC(=O)N(C1CCN(CCC2=CC=CC=C2)CC1)C1=CC=CC=C1
DB00814	Meloxicam	approved	CN1C(C(=O)NC2=NC=C(C)S2)=C(O)C2=C(C=CC=C2)S1(=O)=O
DB00816	Orciprenaline	approved	CC(C)NCC(O)C1=CC(O)=CC(O)=C1
DB00817	Rosoxacin	approved	CCN1C=C(C(O)=O)C(=O)C2=C1C=C(C=C2)C1=CC=NC=C1
DB00818	Propofol	approved	CC(C)C1=CC=CC(C(C)C)=C1O
DB00819	Acetazolamide	approved	CC(=O)NC1=NN=C(S1)S(N)(=O)=O
DB00820	Tadalafil	approved	[H][C@]12CC3=C(NC4=CC=CC=C34)[C@H](N1C(=O)CN(C)C2=O)C1=CC2=C(OCO2)C=C1
DB00821	Carprofen	approved	CC(C(O)=O)C1=CC2=C(C=C1)C1=C(N2)C=CC(Cl)=C1
DB00822	Disulfiram	approved	CCN(CC)C(=S)SSC(=S)N(CC)CC
DB00823	Ethynodiol diacetate	approved	[H][C@@]12CC[C@@](OC(C)=O)(C#C)[C@@]1(C)CC[C@]1([H])[C@@]3([H])CC[C@H](OC(C)=O)C=C3CC[C@@]21[H]
DB00824	Enprofylline	approved	CCCN1C2=C(NC=N2)C(=O)NC1=O
DB00825	Levomenthol	approved	CC(C)[C@@H]1CC[C@@H](C)C[C@H]1O
DB00826	Natamycin	approved	[H][C@@]12C[C@H](O)C[C@]3(O)C[C@H](O)[C@@H](C(O)=O)[C@]([H])(C[C@@H](O[C@]4([H])O[C@H](C)[C@@H](O)[C@H](N)[C@@H]4O)\C=C\C=C\C=C\C=C\C[C@@H](C)OC(=O)\C=C\[C@@]1([H])O2)O3
DB00827	Cinoxacin	approved	CCN1N=C(C(O)=O)C(=O)C2=CC3=C(OCO3)C=C12
DB00828	Fosfomycin	approved	C[C@@H]1O[C@@H]1P(O)(O)=O
DB00829	Diazepam	approved	CN1C2=C(C=C(Cl)C=C2)C(=NCC1=O)C1=CC=CC=C1
DB00830	Phenmetrazine	approved	CC1NCCOC1C1=CC=CC=C1
DB00831	Trifluoperazine	approved	CN1CCN(CCCN2C3=CC=CC=C3SC3=C2C=C(C=C3)C(F)(F)F)CC1
DB00832	Phensuximide	approved	CN1C(=O)CC(C1=O)C1=CC=CC=C1
DB00833	Cefaclor	approved	[H][C@]12SCC(Cl)=C(N1C(=O)[C@H]2NC(=O)[C@H](N)C1=CC=CC=C1)C(O)=O
DB00834	Mifepristone	approved	[H][C@@]12CC[C@@](O)(C#CC)[C@@]1(C)C[C@H](C1=CC=C(C=C1)N(C)C)C1=C3CCC(=O)C=C3CC[C@@]21[H]
DB00835	Brompheniramine	approved	CN(C)CCC(C1=CC=C(Br)C=C1)C1=CC=CC=N1
DB00836	Loperamide	approved	CN(C)C(=O)C(CCN1CCC(O)(CC1)C1=CC=C(Cl)C=C1)(C1=CC=CC=C1)C1=CC=CC=C1
DB00838	Clocortolone	approved	[H][C@@]12C[C@@H](C)[C@H](C(=O)CO)[C@@]1(C)C[C@H](O)[C@@]1(Cl)[C@@]2([H])C[C@H](F)C2=CC(=O)C=C[C@]12C
DB00839	Tolazamide	approved	CC1=CC=C(C=C1)S(=O)(=O)NC(=O)NN1CCCCCC1
DB00841	Dobutamine	approved	CC(CCC1=CC=C(O)C=C1)NCCC1=CC(O)=C(O)C=C1
DB00842	Oxazepam	approved	OC1N=C(C2=CC=CC=C2)C2=C(NC1=O)C=CC(Cl)=C2
DB00843	Donepezil	approved	COC1=C(OC)C=C2C(=O)C(CC3CCN(CC4=CC=CC=C4)CC3)CC2=C1
DB00844	Nalbuphine	approved	O[C@H]1CC[C@@]2(O)[C@H]3CC4=CC=C(O)C5=C4[C@@]2(CCN3CC2CCC2)[C@H]1O5
DB00845	Clofazimine	approved	CC(C)N=C1C=C2N(C3=CC=C(Cl)C=C3)C3=C(C=CC=C3)N=C2C=C1NC1=CC=C(Cl)C=C1
DB00846	Flurandrenolide	approved	CC1(C)O[C@@H]2C[C@H]3[C@@H]4C[C@H](F)C5=CC(=O)CC[C@]5(C)[C@H]4[C@@H](O)C[C@]3(C)[C@@]2(O1)C(=O)CO
DB00847	Cysteamine	approved	NCCS
DB00848	Levamisole	approved	C1CN2C[C@@H](N=C2S1)C1=CC=CC=C1
DB00849	Methylphenobarbital	approved	CCC1(C(=O)NC(=O)N(C)C1=O)C1=CC=CC=C1
DB00850	Perphenazine	approved	OCCN1CCN(CCCN2C3=CC=CC=C3SC3=C2C=C(Cl)C=C3)CC1
DB00851	Dacarbazine	approved	CN(C)\N=N\C1=C(N=CN1)C(N)=O
DB00852	Pseudoephedrine	approved	CN[C@@H](C)[C@@H](O)C1=CC=CC=C1
DB00853	Temozolomide	approved	CN1N=NC2=C(N=CN2C1=O)C(N)=O
DB00854	Levorphanol	approved	[H][C@@]12CCCC[C@@]11CCN(C)[C@@H]2CC2=C1C=C(O)C=C2
DB00855	Aminolevulinic acid	approved	NCC(=O)CCC(O)=O
DB00856	Chlorphenesin	approved	OCC(O)COC1=CC=C(Cl)C=C1
DB00857	Terbinafine	approved	CN(C\C=C\C#CC(C)(C)C)CC1=CC=CC2=CC=CC=C12
DB00859	Penicillamine	approved	[H][C@](N)(C(O)=O)C(C)(C)S
DB00860	Prednisolone	approved	[H][C@@]12CC[C@](O)(C(=O)CO)[C@@]1(C)C[C@H](O)[C@@]1([H])[C@@]2([H])CCC2=CC(=O)C=C[C@]12C
DB00861	Diflunisal	approved	OC(=O)C1=C(O)C=CC(=C1)C1=C(F)C=C(F)C=C1
DB00862	Vardenafil	approved	CCCC1=NC(C)=C2N1NC(=NC2=O)C1=C(OCC)C=CC(=C1)S(=O)(=O)N1CCN(CC)CC1
DB00863	Ranitidine	approved	CNC(NCCSCC1=CC=C(CN(C)C)O1)=C[N+]([O-])=O
DB00864	Tacrolimus	approved	CO[C@@H]1C[C@@H](CC[C@H]1O)\C=C(/C)[C@H]1OC(=O)[C@@H]2CCCCN2C(=O)C(=O)[C@]2(O)O[C@@H]([C@H](C[C@H]2C)OC)[C@H](C[C@@H](C)C\C(C)=C\[C@@H](CC=C)C(=O)C[C@H](O)[C@H]1C)OC
DB00865	Benzphetamine	approved	C[C@@H](CC1=CC=CC=C1)N(C)CC1=CC=CC=C1
DB00867	Ritodrine	approved	C[C@@H](NCCC1=CC=C(O)C=C1)[C@@H](O)C1=CC=C(O)C=C1
DB00868	Benzonatate	approved	CCCCNC1=CC=C(C=C1)C(=O)OCCOCCOCCOCCOCCOCCOCCOCCOCCOC
DB00869	Dorzolamide	approved	CCN[C@H]1C[C@H](C)S(=O)(=O)C2=C1C=C(S2)S(N)(=O)=O
DB00870	Suprofen	approved	CC(C(O)=O)C1=CC=C(C=C1)C(=O)C1=CC=CS1
DB00871	Terbutaline	approved	CC(C)(C)NCC(O)C1=CC(O)=CC(O)=C1
DB00872	Conivaptan	approved	CC1=NC2=C(CCN(C(=O)C3=CC=C(NC(=O)C4=CC=CC=C4C4=CC=CC=C4)C=C3)C3=CC=CC=C23)N1
DB14596	Loteprednol etabonate	approved	[H][C@@]12CC[C@](OC(=O)OCC)(C(=O)OCCl)[C@@]1(C)C[C@H](O)[C@@]1([H])[C@@]2([H])CCC2=CC(=O)C=C[C@]12C
DB00874	Guaifenesin	approved	COC1=CC=CC=C1OCC(O)CO
DB00875	Flupentixol	approved	[H]\C(CCN1CCN(CCO)CC1)=C1/C2=CC=CC=C2SC2=C1C=C(C=C2)C(F)(F)F
DB00876	Eprosartan	approved	CCCCC1=NC=C(\C=C(/CC2=CC=CS2)C(O)=O)N1CC1=CC=C(C=C1)C(O)=O
DB00877	Sirolimus	approved	[H][C@@]1(C[C@@H](C)[C@]2([H])CC(=O)[C@H](C)\C=C(C)\[C@@H](O)[C@@H](OC)C(=O)[C@H](C)C[C@H](C)\C=C\C=C\C=C(C)\[C@H](C[C@]3([H])CC[C@@H](C)[C@@](O)(O3)C(=O)C(=O)N3CCCC[C@@]3([H])C(=O)O2)OC)CC[C@@H](O)[C@@H](C1)OC
DB00878	Chlorhexidine	approved	ClC1=CC=C(NC(=N)NC(=N)NCCCCCCNC(=N)NC(=N)NC2=CC=C(Cl)C=C2)C=C1
DB00879	Emtricitabine	approved	NC1=NC(=O)N(C=C1F)[C@@H]1CS[C@H](CO)O1
DB00880	Chlorothiazide	approved	NS(=O)(=O)C1=C(Cl)C=C2NC=NS(=O)(=O)C2=C1
DB00881	Quinapril	approved	CCOC(=O)[C@H](CCC1=CC=CC=C1)N[C@@H](C)C(=O)N1CC2=CC=CC=C2C[C@H]1C(O)=O
DB00882	Clomifene	approved	CCN(CC)CCOC1=CC=C(C=C1)C(=C(Cl)C1=CC=CC=C1)C1=CC=CC=C1
DB00883	Isosorbide dinitrate	approved	[H][C@]12OC[C@H](O[N+]([O-])=O)[C@@]1([H])OC[C@H]2O[N+]([O-])=O
DB00884	Risedronic acid	approved	OC(CC1=CN=CC=C1)(P(O)(O)=O)P(O)(O)=O
DB00885	Pemirolast	approved	CC1=CC=CN2C(=O)C(=CN=C12)C1=NNN=N1
DB00887	Bumetanide	approved	CCCCNC1=C(OC2=CC=CC=C2)C(=CC(=C1)C(O)=O)S(N)(=O)=O
DB00888	Mechlorethamine	approved	CN(CCCl)CCCl
DB00889	Granisetron	approved	CN1N=C(C(=O)N[C@@H]2C[C@@H]3CCC[C@H](C2)N3C)C2=C1C=CC=C2
DB00890	Dienestrol	approved	[H]\C(C)=C(/C(=C(\[H])C)/C1=CC=C(O)C=C1)\C1=CC=C(O)C=C1
DB00891	Sulfapyridine	approved	NC1=CC=C(C=C1)S(=O)(=O)NC1=CC=CC=N1
DB00892	Oxybuprocaine	approved	CCCCOC1=CC(=CC=C1N)C(=O)OCCN(CC)CC
DB00894	Testolactone	approved	[H][C@@]12CCC3=CC(=O)C=C[C@]3(C)[C@@]1([H])CC[C@]1(C)OC(=O)CC[C@@]21[H]
DB00896	Rimexolone	approved	[H][C@@]12C[C@@H](C)[C@](C)(C(=O)CC)[C@@]1(C)C[C@H](O)[C@@]1([H])[C@@]2([H])CCC2=CC(=O)C=C[C@]12C
DB00897	Triazolam	approved	CC1=NN=C2CN=C(C3=CC=CC=C3Cl)C3=C(C=CC(Cl)=C3)N12
DB00898	Ethanol	approved	CCO
DB00899	Remifentanil	approved	CCC(=O)N(C1=CC=CC=C1)C1(CCN(CCC(=O)OC)CC1)C(=O)OC
DB00900	Didanosine	approved	OC[C@@H]1CC[C@@H](O1)N1C=NC2=C1NC=NC2=O
DB00902	Methdilazine	approved	CN1CCC(CN2C3=CC=CC=C3SC3=CC=CC=C23)C1
DB00903	Etacrynic acid	approved	CCC(=C)C(=O)C1=C(Cl)C(Cl)=C(OCC(O)=O)C=C1
DB00904	Ondansetron	approved	CN1C2=C(C3=CC=CC=C13)C(=O)C(CN1C=CN=C1C)CC2
DB00905	Bimatoprost	approved	CCNC(=O)CCC\C=C/C[C@H]1[C@@H](O)C[C@@H](O)[C@@H]1\C=C\[C@@H](O)CCC1=CC=CC=C1
DB00906	Tiagabine	approved	CC1=C(SC=C1)C(=CCCN1CCC[C@H](C1)C(O)=O)C1=C(C)C=CS1
DB00907	Cocaine	approved	[H][C@]12CC[C@]([H])([C@H]([C@H](C1)OC(=O)C1=CC=CC=C1)C(=O)OC)N2C
DB00908	Quinidine	approved	[H][C@@]12CCN(C[C@@H]1C=C)[C@]([H])(C2)[C@@H](O)C1=C2C=C(OC)C=CC2=NC=C1
DB00909	Zonisamide	approved	NS(=O)(=O)CC1=NOC2=CC=CC=C12
DB00910	Paricalcitol	approved	[H][C@@]1(CC[C@@]2([H])\C(CCC[C@]12C)=C\C=C1C[C@@H](O)C[C@H](O)C1)[C@H](C)\C=C\[C@H](C)C(C)(C)O
DB00911	Tinidazole	approved	CCS(=O)(=O)CCN1C(C)=NC=C1[N+]([O-])=O
DB00912	Repaglinide	approved	CCOC1=C(C=CC(CC(=O)N[C@@H](CC(C)C)C2=CC=CC=C2N2CCCCC2)=C1)C(O)=O
DB00913	Anileridine	approved	CCOC(=O)C1(CCN(CCC2=CC=C(N)C=C2)CC1)C1=CC=CC=C1
DB00914	Phenformin	approved	NC(=N)NC(=N)NCCC1=CC=CC=C1
DB00915	Amantadine	approved	NC12CC3CC(CC(C3)C1)C2
DB00916	Metronidazole	approved	CC1=NC=C(N1CCO)[N+]([O-])=O
DB00917	Dinoprostone	approved	CCCCC[C@H](O)\C=C\[C@H]1[C@H](O)CC(=O)[C@@H]1C\C=C/CCCC(O)=O
DB00918	Almotriptan	approved	CN(C)CCC1=CNC2=C1C=C(CS(=O)(=O)N1CCCC1)C=C2
DB00919	Spectinomycin	approved	[H][C@@]12O[C@H](C)CC(=O)[C@]1(O)O[C@]1([H])[C@@H](NC)[C@@H](O)[C@@H](NC)[C@H](O)[C@@]1([H])O2
DB00920	Ketotifen	approved	CN1CCC(CC1)=C1C2=C(SC=C2)C(=O)CC2=CC=CC=C12
DB00921	Buprenorphine	approved	CO[C@]12CC[C@@]3(C[C@@H]1[C@](C)(O)C(C)(C)C)[C@H]1CC4=C5C(O[C@@H]2[C@@]35CCN1CC1CC1)=C(O)C=C4
DB00922	Levosimendan	approved	C[C@@H]1CC(=O)NN=C1C1=CC=C(NN=C(C#N)C#N)C=C1
DB00923	Ceforanide	approved	[H][C@]12SCC(CSC3=NN=NN3CC(O)=O)=C(N1C(=O)[C@H]2NC(=O)CC1=CC=CC=C1CN)C(O)=O
DB00924	Cyclobenzaprine	approved	CN(C)CCC=C1C2=CC=CC=C2C=CC2=CC=CC=C12
DB00925	Phenoxybenzamine	approved	CC(COC1=CC=CC=C1)N(CCCl)CC1=CC=CC=C1
DB00927	Famotidine	approved	NC(N)=NC1=NC(CSCCC(N)=NS(N)(=O)=O)=CS1
DB00928	Azacitidine	approved	NC1=NC(=O)N(C=N1)[C@@H]1O[C@H](CO)[C@@H](O)[C@H]1O
DB00929	Misoprostol	approved	CCCCC(C)(O)C\C=C\[C@H]1[C@H](O)CC(=O)[C@@H]1CCCCCCC(=O)OC
DB00931	Metacycline	approved	[H][C@@]12[C@@H](O)[C@]3([H])C(=C)C4=C(C(O)=CC=C4)C(=O)C3=C(O)[C@]1(O)C(=O)C(C(N)=O)=C(O)[C@H]2N(C)C
DB00932	Tipranavir	approved	[H][C@@](CC)(C1=CC(NS(=O)(=O)C2=NC=C(C=C2)C(F)(F)F)=CC=C1)C1=C(O)C[C@@](CCC)(CCC2=CC=CC=C2)OC1=O
DB00933	Mesoridazine	approved	CN1CCCCC1CCN1C2=C(SC3=C1C=C(C=C3)S(C)=O)C=CC=C2
DB00934	Maprotiline	approved	CNCCCC12CCC(C3=CC=CC=C13)C1=CC=CC=C21
DB00935	Oxymetazoline	approved	CC1=CC(=C(O)C(C)=C1CC1=NCCN1)C(C)(C)C
DB00936	Salicylic acid	approved	OC(=O)C1=CC=CC=C1O
DB00937	Diethylpropion	approved	CCN(CC)C(C)C(=O)C1=CC=CC=C1
DB00938	Salmeterol	approved	OCC1=C(O)C=CC(=C1)C(O)CNCCCCCCOCCCCC1=CC=CC=C1
DB00939	Meclofenamic acid	approved	CC1=C(Cl)C(NC2=CC=CC=C2C(O)=O)=C(Cl)C=C1
DB00940	Methantheline	approved	CC[N+](C)(CC)CCOC(=O)C1C2=CC=CC=C2OC2=CC=CC=C12
DB00941	Hexafluronium	approved	C[N+](C)(CCCCCC[N+](C)(C)C1C2=C(C=CC=C2)C2=C1C=CC=C2)C1C2=C(C=CC=C2)C2=C1C=CC=C2
DB00942	Cycrimine	approved	OC(CCN1CCCCC1)(C1CCCC1)C1=CC=CC=C1
DB00943	Zalcitabine	approved	NC1=NC(=O)N(C=C1)[C@H]1CC[C@@H](CO)O1
DB00944	Demecarium	approved	CN(CCCCCCCCCCN(C)C(=O)OC1=CC=CC(=C1)[N+](C)(C)C)C(=O)OC1=CC=CC(=C1)[N+](C)(C)C
DB00945	Acetylsalicylic acid	approved	CC(=O)OC1=CC=CC=C1C(O)=O
DB00946	Phenprocoumon	approved	CCC(C1=CC=CC=C1)C1=C(O)C2=C(OC1=O)C=CC=C2
DB00947	Fulvestrant	approved	[H][C@@]12CC[C@H](O)[C@@]1(C)CC[C@]1([H])C3=CC=C(O)C=C3C[C@@H](CCCCCCCCCS(=O)CCCC(F)(F)C(F)(F)F)[C@@]21[H]
DB00948	Mezlocillin	approved	[H][C@]12SC(C)(C)[C@@H](N1C(=O)[C@H]2NC(=O)[C@H](NC(=O)N1CCN(C1=O)S(C)(=O)=O)C1=CC=CC=C1)C(O)=O
DB00949	Felbamate	approved	NC(=O)OCC(COC(N)=O)C1=CC=CC=C1
DB00950	Fexofenadine	approved	CC(C)(C(O)=O)C1=CC=C(C=C1)C(O)CCCN1CCC(CC1)C(O)(C1=CC=CC=C1)C1=CC=CC=C1
DB00951	Isoniazid	approved	NNC(=O)C1=CC=NC=C1
DB00952	Naratriptan	approved	CNS(=O)(=O)CCC1=CC2=C(NC=C2C2CCN(C)CC2)C=C1
DB00953	Rizatriptan	approved	CN(C)CCC1=CNC2=C1C=C(CN1C=NC=N1)C=C2
DB00955	Netilmicin	approved	CCN[C@@H]1C[C@H](N)[C@@H](O[C@H]2OC(CN)=CC[C@H]2N)[C@H](O)[C@H]1O[C@H]1OC[C@](C)(O)[C@H](NC)[C@H]1O
DB00956	Hydrocodone	approved	[H][C@@]12OC3=C(OC)C=CC4=C3[C@@]11CCN(C)[C@]([H])(C4)[C@]1([H])CCC2=O
DB00957	Norgestimate	approved	[H][C@@]12CC[C@@](OC(C)=O)(C#C)[C@@]1(CC)CC[C@]1([H])[C@@]3([H])CC\C(C=C3CC[C@@]21[H])=N/O
DB00958	Carboplatin	approved	[H][N]([H])([H])[Pt]1(OC(=O)C2(CCC2)C(=O)O1)[N]([H])([H])[H]
DB00959	Methylprednisolone	approved	[H][C@@]12CC[C@](O)(C(=O)CO)[C@@]1(C)C[C@H](O)[C@@]1([H])[C@@]2([H])C[C@H](C)C2=CC(=O)C=C[C@]12C
DB00960	Pindolol	approved	CC(C)NCC(O)COC1=CC=CC2=C1C=CN2
DB00961	Mepivacaine	approved	CN1CCCCC1C(=O)NC1=C(C)C=CC=C1C
DB00962	Zaleplon	approved	CCN(C(C)=O)C1=CC=CC(=C1)C1=CC=NC2=C(C=NN12)C#N
DB00963	Bromfenac	approved	NC1=C(CC(O)=O)C=CC=C1C(=O)C1=CC=C(Br)C=C1
DB00964	Apraclonidine	approved	NC1=CC(Cl)=C(NC2=NCCN2)C(Cl)=C1
DB00966	Telmisartan	approved	CCCC1=NC2=C(C=C(C=C2C)C2=NC3=CC=CC=C3N2C)N1CC1=CC=C(C=C1)C1=CC=CC=C1C(O)=O
DB00967	Desloratadine	approved	ClC1=CC2=C(C=C1)C(=C1CCNCC1)C1=C(CC2)C=CC=N1
DB00968	Methyldopa	approved	C[C@](N)(CC1=CC=C(O)C(O)=C1)C(O)=O
DB00969	Alosetron	approved	CN1C2=C(C3=CC=CC=C13)C(=O)N(CC1=C(C)NC=N1)CC2
DB00970	Dactinomycin	approved	[H][C@@]12CCCN1C(=O)[C@H](NC(=O)[C@@H](NC(=O)C1=C3N=C4C(OC3=C(C)C=C1)=C(C)C(=O)C(N)=C4C(=O)N[C@H]1[C@@H](C)OC(=O)[C@H](C(C)C)N(C)C(=O)CN(C)C(=O)[C@]3([H])CCCN3C(=O)[C@H](NC1=O)C(C)C)[C@@H](C)OC(=O)[C@H](C(C)C)N(C)C(=O)CN(C)C2=O)C(C)C
DB00971	Selenium Sulfide	approved	S=[Se]=S
DB00972	Azelastine	approved	CN1CCCC(CC1)N1N=C(CC2=CC=C(Cl)C=C2)C2=CC=CC=C2C1=O
DB00973	Ezetimibe	approved	[H][C@]1(CC[C@H](O)C2=CC=C(F)C=C2)C(=O)N(C2=CC=C(F)C=C2)[C@]1([H])C1=CC=C(O)C=C1
DB00974	Edetic acid	approved	OC(=O)CN(CCN(CC(O)=O)CC(O)=O)CC(O)=O
DB00975	Dipyridamole	approved	OCCN(CCO)C1=NC2=C(N=C(N=C2N2CCCCC2)N(CCO)CCO)C(=N1)N1CCCCC1
DB00976	Telithromycin	approved	[H][C@@]12[C@@H](C)C(=O)[C@H](C)C[C@@](C)(OC)[C@H](O[C@@H]3O[C@H](C)C[C@@H]([C@H]3O)N(C)C)[C@@H](C)C(=O)[C@@H](C)C(=O)O[C@H](CC)[C@@]1(C)OC(=O)N2CCCCN1C=NC(=C1)C1=CC=CN=C1
DB00977	Ethinylestradiol	approved	[H][C@@]12CC[C@@](O)(C#C)[C@@]1(C)CC[C@]1([H])C3=C(CC[C@@]21[H])C=C(O)C=C3
DB00978	Lomefloxacin	approved	CCN1C=C(C(O)=O)C(=O)C2=CC(F)=C(N3CCNC(C)C3)C(F)=C12
DB00979	Cyclopentolate	approved	CN(C)CCOC(=O)C(C1=CC=CC=C1)C1(O)CCCC1
DB00980	Ramelteon	approved	CCC(=O)NCC[C@@H]1CCC2=C1C1=C(OCC1)C=C2
DB00981	Physostigmine	approved	[H][C@]12N(C)CC[C@@]1(C)C1=C(C=CC(OC(=O)NC)=C1)N2C
DB00982	Isotretinoin	approved	C\C(\C=C\C1=C(C)CCCC1(C)C)=C/C=C/C(/C)=C\C(O)=O
DB00983	Formoterol	approved	COC1=CC=C(CC(C)NCC(O)C2=CC(NC=O)=C(O)C=C2)C=C1
DB00984	Nandrolone phenpropionate	approved	[H][C@@]12CC[C@H](OC(=O)CCC3=CC=CC=C3)[C@@]1(C)CC[C@]1([H])[C@@]3([H])CCC(=O)C=C3CC[C@@]21[H]
DB00985	Dimenhydrinate	approved	CN1C2=C(N=C(Cl)N2)C(=O)N(C)C1=O.CN(C)CCOC(C1=CC=CC=C1)C1=CC=CC=C1
DB00986	Glycopyrronium	approved	C[N+]1(C)CCC(C1)OC(=O)C(O)(C1CCCC1)C1=CC=CC=C1
DB00987	Cytarabine	approved	NC1=NC(=O)N(C=C1)[C@@H]1O[C@H](CO)[C@@H](O)[C@@H]1O
DB00988	Dopamine	approved	NCCC1=CC(O)=C(O)C=C1
DB00989	Rivastigmine	approved	CCN(C)C(=O)OC1=CC=CC(=C1)[C@H](C)N(C)C
DB00990	Exemestane	approved	[H][C@@]12CCC(=O)[C@@]1(C)CC[C@@]1([H])[C@@]2([H])CC(=C)C2=CC(=O)C=C[C@]12C
DB00991	Oxaprozin	approved	OC(=O)CCC1=NC(=C(O1)C1=CC=CC=C1)C1=CC=CC=C1
DB00992	Methyl aminolevulinate	approved	COC(=O)CCC(=O)CN
DB00993	Azathioprine	approved	CN1C=NC(=C1SC1=NC=NC2=C1NC=N2)[N+]([O-])=O
DB00995	Auranofin	approved	CCP(CC)(CC)=[Au]S[C@@H]1O[C@H](COC(C)=O)[C@@H](OC(C)=O)[C@H](OC(C)=O)[C@H]1OC(C)=O
DB00996	Gabapentin	approved	NCC1(CC(O)=O)CCCCC1
DB00997	Doxorubicin	approved	COC1=CC=CC2=C1C(=O)C1=C(O)C3=C(C[C@](O)(C[C@@H]3O[C@H]3C[C@H](N)[C@H](O)[C@H](C)O3)C(=O)CO)C(O)=C1C2=O
DB00998	Frovatriptan	approved	CN[C@@H]1CCC2=C(C1)C1=C(N2)C=CC(=C1)C(N)=O
DB00999	Hydrochlorothiazide	approved	NS(=O)(=O)C1=C(Cl)C=C2NCNS(=O)(=O)C2=C1
DB01000	Cyclacillin	approved	[H][C@]12SC(C)(C)[C@@H](N1C(=O)[C@H]2NC(=O)C1(N)CCCCC1)C(O)=O
DB01001	Salbutamol	approved	CC(C)(C)NCC(O)C1=CC(CO)=C(O)C=C1
DB01002	Levobupivacaine	approved	CCCCN1CCCC[C@H]1C(=O)NC1=C(C)C=CC=C1C
DB01003	Cromoglicic acid	approved	OC(COC1=CC=CC2=C1C(=O)C=C(O2)C(O)=O)COC1=CC=CC2=C1C(=O)C=C(O2)C(O)=O
DB01004	Ganciclovir	approved	NC1=NC2=C(N=CN2COC(CO)CO)C(=O)N1
DB01005	Hydroxyurea	approved	NC(=O)NO
DB01006	Letrozole	approved	N#CC1=CC=C(C=C1)C(N1C=NC=N1)C1=CC=C(C=C1)C#N
DB01007	Tioconazole	approved	ClC1=C(COC(CN2C=CN=C2)C2=C(Cl)C=C(Cl)C=C2)C=CS1
DB01008	Busulfan	approved	CS(=O)(=O)OCCCCOS(C)(=O)=O
DB01009	Ketoprofen	approved	CC(C(O)=O)C1=CC(=CC=C1)C(=O)C1=CC=CC=C1
DB01010	Edrophonium	approved	CC[N+](C)(C)C1=CC(O)=CC=C1
DB01011	Metyrapone	approved	CC(C)(C(=O)C1=CN=CC=C1)C1=CC=CN=C1
DB01012	Cinacalcet	approved	C[C@@H](NCCCC1=CC(=CC=C1)C(F)(F)F)C1=CC=CC2=CC=CC=C12
DB01013	Clobetasol propionate	approved	[H][C@@]12C[C@H](C)[C@](OC(=O)CC)(C(=O)CCl)[C@@]1(C)C[C@H](O)[C@@]1(F)[C@@]2([H])CCC2=CC(=O)C=C[C@]12C
DB01014	Balsalazide	approved	OC(=O)CCNC(=O)C1=CC=C(C=C1)\N=N\C1=CC=C(O)C(=C1)C(O)=O
DB01015	Sulfamethoxazole	approved	CC1=CC(NS(=O)(=O)C2=CC=C(N)C=C2)=NO1
DB01016	Glyburide	approved	COC1=C(C=C(Cl)C=C1)C(=O)NCCC1=CC=C(C=C1)S(=O)(=O)NC(=O)NC1CCCCC1
DB01017	Minocycline	approved	[H][C@@]12CC3=C(C(O)=CC=C3N(C)C)C(=O)C1=C(O)[C@]1(O)C(=O)C(C(N)=O)=C(O)[C@@H](N(C)C)[C@]1([H])C2
DB01018	Guanfacine	approved	NC(=N)NC(=O)CC1=C(Cl)C=CC=C1Cl
DB01019	Bethanechol	approved	CC(C[N+](C)(C)C)OC(N)=O
DB01020	Isosorbide mononitrate	approved	[H][C@]12OC[C@@H](O[N+]([O-])=O)[C@@]1([H])OC[C@@H]2O
DB01021	Trichlormethiazide	approved	NS(=O)(=O)C1=C(Cl)C=C2NC(NS(=O)(=O)C2=C1)C(Cl)Cl
DB01022	Phylloquinone	approved	CC(C)CCC[C@@H](C)CCC[C@@H](C)CCC\C(C)=C\CC1=C(C)C(=O)C2=C(C=CC=C2)C1=O
DB01023	Felodipine	approved	CCOC(=O)C1=C(C)NC(C)=C(C1C1=C(Cl)C(Cl)=CC=C1)C(=O)OC
DB01024	Mycophenolic acid	approved	COC1=C(C\C=C(/C)CCC(O)=O)C(O)=C2C(=O)OCC2=C1C
DB01025	Amlexanox	approved	CC(C)C1=CC2=C(OC3=NC(N)=C(C=C3C2=O)C(O)=O)C=C1
DB01026	Ketoconazole	approved	CC(=O)N1CCN(CC1)C1=CC=C(OCC2COC(CN3C=CN=C3)(O2)C2=CC=C(Cl)C=C2Cl)C=C1
DB01028	Methoxyflurane	approved	COC(F)(F)C(Cl)Cl
DB01029	Irbesartan	approved	CCCCC1=NC2(CCCC2)C(=O)N1CC1=CC=C(C=C1)C1=CC=CC=C1C1=NNN=N1
DB01030	Topotecan	approved	CC[C@@]1(O)C(=O)OCC2=C1C=C1N(CC3=CC4=C(C=CC(O)=C4CN(C)C)N=C13)C2=O
DB01031	Ethinamate	approved	NC(=O)OC1(CCCCC1)C#C
DB01032	Probenecid	approved	CCCN(CCC)S(=O)(=O)C1=CC=C(C=C1)C(O)=O
DB01033	Mercaptopurine	approved	S=C1N=CNC2=C1NC=N2
DB01035	Procainamide	approved	CCN(CC)CCNC(=O)C1=CC=C(N)C=C1
DB01036	Tolterodine	approved	CC(C)N(CC[C@H](C1=CC=CC=C1)C1=C(O)C=CC(C)=C1)C(C)C
DB01037	Selegiline	approved	C[C@H](CC1=CC=CC=C1)N(C)CC#C
DB01039	Fenofibrate	approved	CC(C)OC(=O)C(C)(C)OC1=CC=C(C=C1)C(=O)C1=CC=C(Cl)C=C1
DB01041	Thalidomide	approved	O=C1N(C2CCC(=O)NC2=O)C(=O)C2=CC=CC=C12
DB01042	Melphalan	approved	N[C@@H](CC1=CC=C(C=C1)N(CCCl)CCCl)C(O)=O
DB01043	Memantine	approved	CC12CC3CC(C)(C1)CC(N)(C3)C2
DB01044	Gatifloxacin	approved	COC1=C2N(C=C(C(O)=O)C(=O)C2=CC(F)=C1N1CCNC(C)C1)C1CC1
DB01045	Rifampicin	approved	CO[C@H]1\C=C\O[C@@]2(C)OC3=C(C2=O)C2=C(O)C(\C=N\N4CCN(C)CC4)=C(NC(=O)\C(C)=C/C=C/[C@H](C)[C@H](O)[C@@H](C)[C@@H](O)[C@@H](C)[C@H](OC(C)=O)[C@@H]1C)C(O)=C2C(O)=C3C
DB01046	Lubiprostone	approved	[H][C@@]12CC(=O)[C@H](CCCCCCC(O)=O)[C@@]1([H])CC[C@@](O)(O2)C(F)(F)CCCC
DB01047	Fluocinonide	approved	[H][C@@]12C[C@@]3([H])[C@]4([H])C[C@H](F)C5=CC(=O)C=C[C@]5(C)[C@@]4(F)[C@@H](O)C[C@]3(C)[C@@]1(OC(C)(C)O2)C(=O)COC(C)=O
DB01048	Abacavir	approved	NC1=NC2=C(N=CN2[C@@H]2C[C@H](CO)C=C2)C(NC2CC2)=N1
DB01050	Ibuprofen	approved	CC(C)CC1=CC=C(C=C1)C(C)C(O)=O
DB01051	Novobiocin	approved	CO[C@@H]1[C@@H](OC(N)=O)[C@@H](O)[C@H](OC2=C(C)C3=C(C=C2)C(O)=C(NC(=O)C2=CC=C(O)C(CC=C(C)C)=C2)C(=O)O3)OC1(C)C
DB01053	Benzylpenicillin	approved	[H][C@]12SC(C)(C)[C@@H](N1C(=O)[C@H]2NC(=O)CC1=CC=CC=C1)C(O)=O
DB01054	Nitrendipine	approved	CCOC(=O)C1=C(C)NC(C)=C(C1C1=CC(=CC=C1)[N+]([O-])=O)C(=O)OC
DB01056	Tocainide	approved	CC(N)C(=O)NC1=C(C)C=CC=C1C
DB01057	Echothiophate	approved	CCOP(=O)(OCC)SCC[N+](C)(C)C
DB01058	Praziquantel	approved	O=C(C1CCCCC1)N1CC2N(CCC3=CC=CC=C23)C(=O)C1
DB01059	Norfloxacin	approved	CCN1C=C(C(O)=O)C(=O)C2=CC(F)=C(C=C12)N1CCNCC1
DB01060	Amoxicillin	approved	[H][C@]12SC(C)(C)[C@@H](N1C(=O)[C@H]2NC(=O)[C@H](N)C1=CC=C(O)C=C1)C(O)=O
DB01061	Azlocillin	approved	[H][C@](NC(=O)N1CCNC1=O)(C(=O)N[C@@H]1C(=O)N2[C@@H](C(O)=O)C(C)(C)S[C@]12[H])C1=CC=CC=C1
DB01062	Oxybutynin	approved	CCN(CC)CC#CCOC(=O)C(O)(C1CCCCC1)C1=CC=CC=C1
DB01063	Acetophenazine	approved	CC(=O)C1=CC=C2SC3=C(C=CC=C3)N(CCCN3CCN(CCO)CC3)C2=C1
DB01064	Isoprenaline	approved	CC(C)NCC(O)C1=CC(O)=C(O)C=C1
DB01065	Melatonin	approved	COC1=CC2=C(NC=C2CCNC(C)=O)C=C1
DB01066	Cefditoren	approved	[H][C@]12SCC(\C=C/C3=C(C)N=CS3)=C(N1C(=O)[C@H]2NC(=O)C(=N/OC)\C1=CSC(N)=N1)C(O)=O
DB01067	Glipizide	approved	CC1=NC=C(N=C1)C(=O)NCCC1=CC=C(C=C1)S(=O)(=O)NC(=O)NC1CCCCC1
DB01068	Clonazepam	approved	[O-][N+](=O)C1=CC2=C(NC(=O)CN=C2C2=CC=CC=C2Cl)C=C1
DB01069	Promethazine	approved	CC(CN1C2=CC=CC=C2SC2=CC=CC=C12)N(C)C
DB01070	Dihydrotachysterol	approved	CC(C)[C@@H](C)\C=C\[C@@H](C)[C@@]1([H])CC[C@@]2([H])\C(CCC[C@]12C)=C\C=C1/C[C@@H](O)CC[C@@H]1C
DB01072	Atazanavir	approved	COC(=O)N[C@H](C(=O)N[C@@H](CC1=CC=CC=C1)[C@@H](O)CN(CC1=CC=C(C=C1)C1=CC=CC=N1)NC(=O)[C@@H](NC(=O)OC)C(C)(C)C)C(C)(C)C
DB01073	Fludarabine	approved	NC1=NC(F)=NC2=C1N=CN2[C@@H]1O[C@H](CO)[C@@H](O)[C@@H]1O
DB01074	Perhexiline	approved	C(C(C1CCCCC1)C1CCCCC1)C1CCCCN1
DB01075	Diphenhydramine	approved	CN(C)CCOC(C1=CC=CC=C1)C1=CC=CC=C1
DB01076	Atorvastatin	approved	CC(C)C1=C(C(=O)NC2=CC=CC=C2)C(=C(N1CC[C@@H](O)C[C@@H](O)CC(O)=O)C1=CC=C(F)C=C1)C1=CC=CC=C1
DB01077	Etidronic acid	approved	CC(O)(P(O)(O)=O)P(O)(O)=O
DB01078	Deslanoside	approved	C[C@H]1O[C@H](C[C@H](O)[C@@H]1O[C@H]1C[C@H](O)[C@H](O[C@H]2C[C@H](O)[C@H](O[C@@H]3O[C@H](CO)[C@@H](O)[C@H](O)[C@H]3O)[C@@H](C)O2)[C@@H](C)O1)O[C@H]1CC[C@@]2(C)[C@H](CC[C@@H]3[C@@H]2C[C@@H](O)[C@]2(C)[C@H](CC[C@]32O)C2=CC(=O)OC2)C1
DB01079	Tegaserod	approved	CCCCCNC(=N)N\N=C\C1=CNC2=C1C=C(OC)C=C2
DB01080	Vigabatrin	approved	NC(CCC(O)=O)C=C
DB01081	Diphenoxylate	approved	CCOC(=O)C1(CCN(CCC(C#N)(C2=CC=CC=C2)C2=CC=CC=C2)CC1)C1=CC=CC=C1
DB01082	Streptomycin	approved	CN[C@H]1[C@H](O)[C@@H](O)[C@H](CO)O[C@H]1O[C@H]1[C@H](O[C@H]2[C@H](O)[C@@H](O)[C@H](NC(N)=N)[C@@H](O)[C@@H]2NC(N)=N)O[C@@H](C)[C@]1(O)C=O
DB01083	Orlistat	approved	CCCCCCCCCCC[C@@H](C[C@@H]1OC(=O)[C@H]1CCCCCC)OC(=O)[C@H](CC(C)C)NC=O
DB01084	Emedastine	approved	CCOCCN1C(=NC2=CC=CC=C12)N1CCCN(C)CC1
DB01085	Pilocarpine	approved	CC[C@H]1[C@@H](CC2=CN=CN2C)COC1=O
DB01086	Benzocaine	approved	CCOC(=O)C1=CC=C(N)C=C1
DB01087	Primaquine	approved	COC1=CC(NC(C)CCCN)=C2N=CC=CC2=C1
DB01088	Iloprost	approved	[H][C@]12C[C@@H](O)[C@H](\C=C\[C@@H](O)C(C)CC#CC)[C@@]1([H])C\C(C2)=C\CCCC(O)=O
DB01089	Deserpidine	approved	[H][C@]12C[C@@H](OC(=O)C3=CC(OC)=C(OC)C(OC)=C3)[C@H](OC)[C@@H](C(=O)OC)[C@@]1([H])C[C@@]1([H])N(CCC3=C1NC1=CC=CC=C31)C2
DB01090	Pentolinium	approved	C[N+]1(CCCCC[N+]2(C)CCCC2)CCCC1
DB01091	Butenafine	approved	CN(CC1=CC=C(C=C1)C(C)(C)C)CC1=CC=CC2=CC=CC=C12
DB01092	Ouabain	approved	[H][C@@]12CC[C@]3(O)C[C@H](C[C@@H](O)[C@]3(CO)[C@@]1([H])[C@H](O)C[C@]1(C)[C@H](CC[C@]21O)C1=CC(=O)OC1)O[C@@H]1O[C@@H](C)[C@H](O)[C@@H](O)[C@H]1O
DB01093	Dimethyl sulfoxide	approved	CS(C)=O
DB01095	Fluvastatin	approved	CC(C)N1C(\C=C\C(O)CC(O)CC(O)=O)=C(C2=CC=CC=C12)C1=CC=C(F)C=C1
DB01096	Oxamniquine	approved	CC(C)NCC1CCC2=CC(CO)=C(C=C2N1)[N+]([O-])=O
DB01097	Leflunomide	approved	CC1=C(C=NO1)C(=O)NC1=CC=C(C=C1)C(F)(F)F
DB01098	Rosuvastatin	approved	CC(C)C1=NC(=NC(C2=CC=C(F)C=C2)=C1\C=C\[C@@H](O)C[C@@H](O)CC(=O)O)N(C)S(C)(=O)=O
DB01099	Flucytosine	approved	NC1=C(F)C=NC(=O)N1
DB01100	Pimozide	approved	FC1=CC=C(C=C1)C(CCCN1CCC(CC1)N1C(=O)NC2=CC=CC=C12)C1=CC=C(F)C=C1
DB01101	Capecitabine	approved	CCCCCOC(=O)NC1=NC(=O)N(C=C1F)[C@@H]1O[C@H](C)[C@@H](O)[C@H]1O
DB01102	Arbutamine	approved	O[C@@H](CNCCCCC1=CC=C(O)C=C1)C1=CC(O)=C(O)C=C1
DB01104	Sertraline	approved	CN[C@H]1CC[C@@H](C2=CC(Cl)=C(Cl)C=C2)C2=CC=CC=C12
DB01105	Sibutramine	approved	CC(C)CC(N(C)C)C1(CCC1)C1=CC=C(Cl)C=C1
DB01106	Levocabastine	approved	C[C@@H]1CN(CC[C@]1(C(O)=O)C1=CC=CC=C1)[C@H]1CC[C@](CC1)(C#N)C1=CC=C(F)C=C1
DB01107	Methyprylon	approved	CCC1(CC)C(=O)NCC(C)C1=O
DB01108	Trilostane	approved	[H][C@@]12CC[C@H](O)[C@@]1(C)CC[C@@]1([H])[C@@]2([H])CC[C@@]23O[C@@H]2C(O)=C(C[C@]13C)C#N
DB01110	Miconazole	approved	ClC1=CC(Cl)=C(COC(CN2C=CN=C2)C2=C(Cl)C=C(Cl)C=C2)C=C1
DB01111	Colistimethate	approved	CCC(C)CCCCC(=O)NC(CCNCS([O-])(=O)=O)C(=O)NC(C(C)O)C(=O)NC(CCNCS([O-])(=O)=O)C(=O)NC1CCNC(=O)C(NC(=O)C(CCNCS([O-])(=O)=O)NC(=O)C(CCNCS([O-])(=O)=O)NC(=O)C(CC(C)C)NC(=O)C(CC(C)C)NC(=O)C(CCNCS([O-])(=O)=O)NC1=O)C(C)O
DB01112	Cefuroxime	approved	[H][C@]12SCC(COC(N)=O)=C(N1C(=O)[C@H]2NC(=O)C(=N/OC)\C1=CC=CO1)C(O)=O
DB01113	Papaverine	approved	COC1=C(OC)C=C(CC2=NC=CC3=CC(OC)=C(OC)C=C23)C=C1
DB01114	Chlorpheniramine	approved	CN(C)CCC(C1=CC=C(Cl)C=C1)C1=CC=CC=N1
DB01115	Nifedipine	approved	COC(=O)C1=C(C)NC(C)=C(C1C1=CC=CC=C1[N+]([O-])=O)C(=O)OC
DB01116	Trimethaphan	approved	O=C1N(CC2=CC=CC=C2)C2C[S+]3CCCC3C2N1CC1=CC=CC=C1
DB01117	Atovaquone	approved	OC1=C([C@H]2CC[C@@H](CC2)C2=CC=C(Cl)C=C2)C(=O)C2=CC=CC=C2C1=O
DB01118	Amiodarone	approved	CCCCC1=C(C(=O)C2=CC(I)=C(OCCN(CC)CC)C(I)=C2)C2=C(O1)C=CC=C2
DB01119	Diazoxide	approved	CC1=NS(=O)(=O)C2=C(N1)C=CC(Cl)=C2
DB01120	Gliclazide	approved	[H][C@@]12CCC[C@]1([H])CN(C2)NC(=O)NS(=O)(=O)C1=CC=C(C)C=C1
DB01121	Phenacemide	approved	NC(=O)NC(=O)CC1=CC=CC=C1
DB01122	Ambenonium	approved	CC[N+](CC)(CCNC(=O)C(=O)NCC[N+](CC)(CC)CC1=CC=CC=C1Cl)CC1=CC=CC=C1Cl
DB01123	Proflavine	approved	NC1=CC2=NC3=C(C=CC(N)=C3)C=C2C=C1
DB01124	Tolbutamide	approved	CCCCNC(=O)NS(=O)(=O)C1=CC=C(C)C=C1
DB01125	Anisindione	approved	COC1=CC=C(C=C1)C1C(=O)C2=CC=CC=C2C1=O
DB01126	Dutasteride	approved	[H][C@@]1(CC[C@@]2([H])[C@]3([H])CC[C@@]4([H])NC(=O)C=C[C@]4(C)[C@@]3([H])CC[C@]12C)C(=O)NC1=CC(=CC=C1C(F)(F)F)C(F)(F)F
DB01127	Econazole	approved	ClC1=CC=C(COC(CN2C=CN=C2)C2=C(Cl)C=C(Cl)C=C2)C=C1
DB01128	Bicalutamide	approved	CC(O)(CS(=O)(=O)C1=CC=C(F)C=C1)C(=O)NC1=CC(=C(C=C1)C#N)C(F)(F)F
DB01129	Rabeprazole	approved	COCCCOC1=C(C)C(CS(=O)C2=NC3=CC=CC=C3N2)=NC=C1
DB01130	Prednicarbate	approved	[H][C@@]12CC[C@](OC(=O)OCC)(C(=O)COC(=O)CC)[C@@]1(C)C[C@H](O)[C@@]1([H])[C@@]2([H])CCC2=CC(=O)C=C[C@]12C
DB01131	Proguanil	approved	CC(C)NC(=N)NC(=N)NC1=CC=C(Cl)C=C1
DB01132	Pioglitazone	approved	CCC1=CN=C(CCOC2=CC=C(CC3SC(=O)NC3=O)C=C2)C=C1
DB01133	Tiludronic acid	approved	OP(O)(=O)C(SC1=CC=C(Cl)C=C1)P(O)(O)=O
DB01135	Doxacurium	approved	COC1=CC(CC2C3=C(OC)C(OC)=C(OC)C=C3CC[N+]2(C)CCCOC(=O)CCC(=O)OCCC[N+]2(C)CCC3=CC(OC)=C(OC)C(OC)=C3C2CC2=CC(OC)=C(OC)C(OC)=C2)=CC(OC)=C1OC
DB01136	Carvedilol	approved	COC1=CC=CC=C1OCCNCC(O)COC1=CC=CC2=C1C1=CC=CC=C1N2
DB01137	Levofloxacin	approved	C[C@H]1COC2=C3N1C=C(C(O)=O)C(=O)C3=CC(F)=C2N1CCN(C)CC1
DB01138	Sulfinpyrazone	approved	O=C1C(CCS(=O)C2=CC=CC=C2)C(=O)N(N1C1=CC=CC=C1)C1=CC=CC=C1
DB01139	Cefapirin	approved	[H][C@]12SCC(COC(C)=O)=C(N1C(=O)[C@H]2NC(=O)CSC1=CC=NC=C1)C(O)=O
DB01140	Cefadroxil	approved	[H][C@]12SCC(C)=C(N1C(=O)[C@H]2NC(=O)[C@H](N)C1=CC=C(O)C=C1)C(O)=O
DB01141	Micafungin	approved	CCCCCOC1=CC=C(C=C1)C1=CC(=NO1)C1=CC=C(C=C1)C(=O)N[C@H]1C[C@@H](O)[C@@H](O)NC(=O)[C@@H]2[C@@H](O)[C@@H](C)CN2C(=O)[C@@H](NC(=O)[C@@H](NC(=O)[C@@H]2C[C@@H](O)CN2C(=O)[C@@H](NC1=O)[C@@H](C)O)[C@H](O)[C@@H](O)C1=CC(OS(O)(=O)=O)=C(O)C=C1)[C@H](O)CC(N)=O
DB01142	Doxepin	approved	[H]C(CCN(C)C)=C1C2=CC=CC=C2COC2=CC=CC=C12
DB01143	Amifostine	approved	NCCCNCCSP(O)(O)=O
DB01144	Diclofenamide	approved	NS(=O)(=O)C1=CC(=C(Cl)C(Cl)=C1)S(N)(=O)=O
DB01145	Sulfoxone	approved	OS(=O)CNC1=CC=C(C=C1)S(=O)(=O)C1=CC=C(NCS(O)=O)C=C1
DB01146	Diphenylpyraline	approved	CN1CCC(CC1)OC(C1=CC=CC=C1)C1=CC=CC=C1
DB01147	Cloxacillin	approved	[H][C@]12SC(C)(C)[C@@H](N1C(=O)[C@H]2NC(=O)C1=C(C)ON=C1C1=CC=CC=C1Cl)C(O)=O
DB01148	Flavoxate	approved	CC1=C(OC2=C(C=CC=C2C(=O)OCCN2CCCCC2)C1=O)C1=CC=CC=C1
DB01149	Nefazodone	approved	CCC1=NN(CCCN2CCN(CC2)C2=CC(Cl)=CC=C2)C(=O)N1CCOC1=CC=CC=C1
DB01150	Cefprozil	approved	[H][C@]12SCC(C=CC)=C(N1C(=O)[C@@]2([H])NC(=O)[C@H](N)C1=CC=C(O)C=C1)C(O)=O
DB01151	Desipramine	approved	CNCCCN1C2=CC=CC=C2CCC2=CC=CC=C12
DB01152	Candicidin	approved	CC(CC(C)C1OC(=O)CC(=O)CCCC(=O)CC(O)CC(O)CC(O)CC(=O)CC(O)C(C(O)CC(OC2O[C@H](C)[C@@H](O)[C@H](N)[C@@H]2O)\C=C\C=C\C=C\C=C\C=C\C=C\C=C\C1C)C(O)=O)C(O)CC(=O)C1=CC=C(N)C=C1
DB01153	Sertaconazole	approved	ClC1=CC(Cl)=C(C=C1)C(CN1C=CN=C1)OCC1=CSC2=C1C=CC=C2Cl
DB01154	Thiamylal	approved	CCCC(C)C1(CC=C)C(=O)NC(=S)NC1=O
DB01155	Gemifloxacin	approved	CO\N=C1/CN(CC1CN)C1=NC2=C(C=C1F)C(=O)C(=CN2C1CC1)C(O)=O
DB01156	Bupropion	approved	CC(NC(C)(C)C)C(=O)C1=CC(Cl)=CC=C1
DB01157	Trimetrexate	approved	COC1=CC(NCC2=C(C)C3=C(C=C2)N=C(N)N=C3N)=CC(OC)=C1OC
DB01158	Bretylium	approved	CC[N+](C)(C)CC1=CC=CC=C1Br
DB01159	Halothane	approved	[H]C(Cl)(Br)C(F)(F)F
DB01160	Dinoprost tromethamine	approved	NC(CO)(CO)CO.CCCCC[C@H](O)\C=C\[C@H]1[C@H](O)C[C@H](O)[C@@H]1C\C=C/CCCC(O)=O
DB01161	Chloroprocaine	approved	CCN(CC)CCOC(=O)C1=C(Cl)C=C(N)C=C1
DB01162	Terazosin	approved	COC1=C(OC)C=C2C(N)=NC(=NC2=C1)N1CCN(CC1)C(=O)C1CCCO1
DB01164	Calcium chloride	approved	[Cl-].[Cl-].[Ca++]
DB01165	Ofloxacin	approved	CC1COC2=C3N1C=C(C(O)=O)C(=O)C3=CC(F)=C2N1CCN(C)CC1
DB01166	Cilostazol	approved	O=C1CCC2=C(N1)C=CC(OCCCCC1=NN=NN1C1CCCCC1)=C2
DB01167	Itraconazole	approved	CCC(C)N1N=CN(C1=O)C1=CC=C(C=C1)N1CCN(CC1)C1=CC=C(OC[C@H]2CO[C@@](CN3C=NC=N3)(O2)C2=C(Cl)C=C(Cl)C=C2)C=C1
DB01168	Procarbazine	approved	CNNCC1=CC=C(C=C1)C(=O)NC(C)C
DB01169	Arsenic trioxide	approved	O=[As]O[As]=O
DB01170	Guanethidine	approved	NC(N)=NCCN1CCCCCCC1
DB01171	Moclobemide	approved	ClC1=CC=C(C=C1)C(=O)NCCN1CCOCC1
DB01172	Kanamycin	approved	NC[C@H]1O[C@H](O[C@@H]2[C@@H](N)C[C@@H](N)[C@H](O[C@H]3O[C@H](CO)[C@@H](O)[C@H](N)[C@H]3O)[C@H]2O)[C@H](O)[C@@H](O)[C@@H]1O
DB01173	Orphenadrine	approved	CN(C)CCOC(C1=CC=CC=C1)C1=CC=CC=C1C
DB01174	Phenobarbital	approved	CCC1(C(=O)NC(=O)NC1=O)C1=CC=CC=C1
DB01175	Escitalopram	approved	CN(C)CCC[C@]1(OCC2=C1C=CC(=C2)C#N)C1=CC=C(F)C=C1
DB01176	Cyclizine	approved	CN1CCN(CC1)C(C1=CC=CC=C1)C1=CC=CC=C1
DB01177	Idarubicin	approved	C[C@@H]1O[C@H](C[C@H](N)[C@@H]1O)O[C@H]1C[C@@](O)(CC2=C1C(O)=C1C(=O)C3=CC=CC=C3C(=O)C1=C2O)C(C)=O
DB01178	Chlormezanone	approved	CN1C(C2=CC=C(Cl)C=C2)S(=O)(=O)CCC1=O
DB01179	Podofilox	approved	[H][C@]12COC(=O)[C@]1([H])[C@H](C1=CC(OC)=C(OC)C(OC)=C1)C1=CC3=C(OCO3)C=C1[C@@H]2O
DB01180	Rescinnamine	approved	[H][C@]12C[C@@H](OC(=O)C=CC3=CC(OC)=C(OC)C(OC)=C3)[C@H](OC)[C@@H](C(=O)OC)[C@@]1([H])C[C@@]1([H])N(CCC3=C1NC1=C3C=CC(OC)=C1)C2
DB01181	Ifosfamide	approved	ClCCNP1(=O)OCCCN1CCCl
DB01182	Propafenone	approved	CCCNCC(O)COC1=C(C=CC=C1)C(=O)CCC1=CC=CC=C1
DB01183	Naloxone	approved	OC1=CC=C2C[C@H]3N(CC=C)CC[C@@]45[C@@H](OC1=C24)C(=O)CC[C@@]35O
DB01184	Domperidone	approved	ClC1=CC2=C(C=C1)N(C1CCN(CCCN3C(=O)NC4=CC=CC=C34)CC1)C(=O)N2
DB01185	Fluoxymesterone	approved	[H][C@@]12CC[C@](C)(O)[C@@]1(C)C[C@H](O)[C@@]1(F)[C@@]2([H])CCC2=CC(=O)CC[C@]12C
DB01186	Pergolide	approved	[H][C@@]12CC3=CNC4=CC=CC(=C34)[C@@]1([H])C[C@@H](CSC)CN2CCC
DB01187	Iophendylate	approved	CCOC(=O)CCCCCCCCC(C)C1=CC=CC=C1I
DB01188	Ciclopirox	approved	CC1=CC(=O)N(O)C(=C1)C1CCCCC1
DB01189	Desflurane	approved	FC(F)OC(F)C(F)(F)F
DB01190	Clindamycin	approved	[H][C@@](NC(=O)[C@@H]1C[C@@H](CCC)CN1C)([C@H](C)Cl)[C@@]1([H])O[C@H](SC)[C@H](O)[C@@H](O)[C@H]1O
DB01191	Dexfenfluramine	approved	CCN[C@@H](C)CC1=CC=CC(=C1)C(F)(F)F
DB01192	Oxymorphone	approved	[H][C@@]12OC3=C(O)C=CC4=C3[C@@]11CCN(C)[C@]([H])(C4)[C@]1(O)CCC2=O
DB01193	Acebutolol	approved	CCCC(=O)NC1=CC=C(OCC(O)CNC(C)C)C(=C1)C(C)=O
DB01194	Brinzolamide	approved	CCN[C@H]1CN(CCCOC)S(=O)(=O)C2=C1C=C(S2)S(N)(=O)=O
DB01195	Flecainide	approved	FC(F)(F)COC1=CC(C(=O)NCC2CCCCN2)=C(OCC(F)(F)F)C=C1
DB01196	Estramustine	approved	[H][C@@]12CC[C@H](O)[C@@]1(C)CC[C@]1([H])C3=CC=C(OC(=O)N(CCCl)CCCl)C=C3CC[C@@]21[H]
DB01197	Captopril	approved	C[C@H](CS)C(=O)N1CCC[C@H]1C(O)=O
DB01198	Zopiclone	approved	CN1CCN(CC1)C(=O)OC1N(C(=O)C2=NC=CN=C12)C1=NC=C(Cl)C=C1
DB01199	Tubocurarine	approved	[H][C@@]12CC3=CC=C(OC4=C5C(CC[N+](C)(C)[C@]5([H])CC5=CC(OC6=C(OC)C=C(CCN1C)C2=C6)=C(O)C=C5)=CC(OC)=C4O)C=C3
DB01200	Bromocriptine	approved	[H][C@@]12CCCN1C(=O)[C@H](CC(C)C)N1C(=O)[C@](NC(=O)[C@H]3CN(C)[C@]4([H])CC5=C(Br)NC6=CC=CC(=C56)C4=C3)(O[C@@]21O)C(C)C
DB01201	Rifapentine	approved	CO[C@H]1\C=C\O[C@@]2(C)OC3=C(C2=O)C2=C(C(O)=C3C)C(O)=C(NC(=O)\C(C)=C/C=C/[C@H](C)[C@H](O)[C@@H](C)[C@@H](O)[C@@H](C)[C@H](OC(C)=O)[C@@H]1C)C(\C=N\N1CCN(CC1)C1CCCC1)=C2O
DB01202	Levetiracetam	approved	CC[C@H](N1CCCC1=O)C(N)=O
DB01203	Nadolol	approved	CC(C)(C)NCC(O)COC1=CC=CC2=C1C[C@H](O)[C@H](O)C2
DB01204	Mitoxantrone	approved	OCCNCCNC1=CC=C(NCCNCCO)C2=C1C(=O)C1=C(C(O)=CC=C1O)C2=O
DB01205	Flumazenil	approved	CCOC(=O)C1=C2CN(C)C(=O)C3=C(C=CC(F)=C3)N2C=N1
DB01206	Lomustine	approved	ClCCN(N=O)C(=O)NC1CCCCC1
DB01208	Sparfloxacin	approved	C[C@H]1CN(C[C@@H](C)N1)C1=C(F)C(N)=C2C(=O)C(=CN(C3CC3)C2=C1F)C(O)=O
DB01209	Dezocine	approved	[H][C@@]12CC3=CC=C(O)C=C3[C@@](C)(CCCCC1)[C@H]2N
DB01210	Levobunolol	approved	CC(C)(C)NC[C@H](O)COC1=CC=CC2=C1CCCC2=O
DB01211	Clarithromycin	approved	[H][C@@]1(C[C@@](C)(OC)[C@@H](O)[C@H](C)O1)O[C@H]1[C@H](C)[C@@H](O[C@]2([H])O[C@H](C)C[C@@H]([C@H]2O)N(C)C)[C@@](C)(C[C@@H](C)C(=O)[C@H](C)[C@@H](O)[C@](C)(O)[C@@H](CC)OC(=O)[C@@H]1C)OC
DB01212	Ceftriaxone	approved	[H][C@]12SCC(CSC3=NC(=O)C(=O)NN3C)=C(N1C(=O)[C@H]2NC(=O)C(=N/OC)\C1=CSC(N)=N1)C(O)=O
DB01213	Fomepizole	approved	CC1=CNN=C1
DB01214	Metipranolol	approved	CC(C)NCC(O)COC1=C(C)C(C)=C(OC(C)=O)C(C)=C1
DB01215	Estazolam	approved	ClC1=CC2=C(C=C1)N1C=NN=C1CN=C2C1=CC=CC=C1
DB01216	Finasteride	approved	[H][C@@]12CC[C@H](C(=O)NC(C)(C)C)[C@@]1(C)CC[C@@]1([H])[C@@]2([H])CC[C@@]2([H])NC(=O)C=C[C@]12C
DB01217	Anastrozole	approved	CC(C)(C#N)C1=CC(=CC(CN2C=NC=N2)=C1)C(C)(C)C#N
DB01218	Halofantrine	approved	CCCCN(CCCC)CCC(O)C1=C2C=CC(=CC2=C2C=C(Cl)C=C(Cl)C2=C1)C(F)(F)F
DB01219	Dantrolene	approved	[O-][N+](=O)C1=CC=C(C=C1)C1=CC=C(O1)\C=N\N1CC(=O)NC1=O
DB01220	Rifaximin	approved	CO[C@H]1\C=C\O[C@@]2(C)OC3=C(C)C(O)=C4C(O)=C(NC(=O)\C(C)=C/C=C/[C@H](C)[C@H](O)[C@@H](C)[C@@H](O)[C@@H](C)[C@H](OC(C)=O)[C@@H]1C)C1=C(N=C5C=C(C)C=CN15)C4=C3C2=O
DB01221	Ketamine	approved	CNC1(CCCCC1=O)C1=CC=CC=C1Cl
DB01222	Budesonide	approved	[H][C@@]12C[C@H]3OC(CCC)O[C@@]3(C(=O)CO)[C@@]1(C)C[C@H](O)[C@@]1([H])[C@@]2([H])CCC2=CC(=O)C=C[C@]12C
DB01223	Aminophylline	approved	NCCN.CN1C2=C(NC=N2)C(=O)N(C)C1=O.CN1C2=C(NC=N2)C(=O)N(C)C1=O
DB01224	Quetiapine	approved	OCCOCCN1CCN(CC1)C1=NC2=CC=CC=C2SC2=CC=CC=C12
DB01226	Mivacurium	approved	COC1=CC(C[C@@H]2C3=CC(OC)=C(OC)C=C3CC[N+]2(C)CCCOC(=O)CC\C=C\CCC(=O)OCCC[N+]2(C)CCC3=CC(OC)=C(OC)C=C3[C@H]2CC2=CC(OC)=C(OC)C(OC)=C2)=CC(OC)=C1OC
DB01227	Levacetylmethadol	approved	CC[C@H](OC(C)=O)C(C[C@H](C)N(C)C)(C1=CC=CC=C1)C1=CC=CC=C1
DB01228	Encainide	approved	COC1=CC=C(C=C1)C(=O)NC1=CC=CC=C1CCC1CCCCN1C
DB01229	Paclitaxel	approved	[H][C@]12[C@H](OC(=O)C3=CC=CC=C3)[C@]3(O)C[C@H](OC(=O)[C@H](O)[C@@H](NC(=O)C4=CC=CC=C4)C4=CC=CC=C4)C(C)=C([C@@H](OC(C)=O)C(=O)[C@]1(C)[C@@H](O)C[C@H]1OC[C@@]21OC(C)=O)C3(C)C
DB01230	Pemoline	approved	NC1=NC(=O)C(O1)C1=CC=CC=C1
DB01231	Diphenidol	approved	OC(CCCN1CCCCC1)(C1=CC=CC=C1)C1=CC=CC=C1
DB01232	Saquinavir	approved	[H][C@@]12CCCC[C@]1([H])CN(C[C@@H](O)[C@H](CC1=CC=CC=C1)NC(=O)[C@H](CC(N)=O)NC(=O)C1=NC3=C(C=CC=C3)C=C1)[C@@H](C2)C(=O)NC(C)(C)C
DB01233	Metoclopramide	approved	CCN(CC)CCNC(=O)C1=CC(Cl)=C(N)C=C1OC
DB01234	Dexamethasone	approved	[H][C@@]12C[C@@H](C)[C@](O)(C(=O)CO)[C@@]1(C)C[C@H](O)[C@@]1(F)[C@@]2([H])CCC2=CC(=O)C=C[C@]12C
DB01235	Levodopa	approved	N[C@@H](CC1=CC(O)=C(O)C=C1)C(O)=O
DB01236	Sevoflurane	approved	FCOC(C(F)(F)F)C(F)(F)F
DB01237	Bromodiphenhydramine	approved	CN(C)CCOC(C1=CC=CC=C1)C1=CC=C(Br)C=C1
DB01238	Aripiprazole	approved	ClC1=CC=CC(N2CCN(CCCCOC3=CC4=C(CCC(=O)N4)C=C3)CC2)=C1Cl
DB01239	Chlorprothixene	approved	CN(C)CC\C=C1\C2=CC=CC=C2SC2=CC=C(Cl)C=C12
DB01240	Epoprostenol	approved	[H][C@]12C[C@@H](O)[C@H](\C=C\[C@@H](O)CCCCC)[C@@]1([H])C\C(O2)=C\CCCC(O)=O
DB01241	Gemfibrozil	approved	CC1=CC(OCCCC(C)(C)C(O)=O)=C(C)C=C1
DB01242	Clomipramine	approved	CN(C)CCCN1C2=CC=CC=C2CCC2=C1C=C(Cl)C=C2
DB01243	Chloroxine	approved	OC1=C(Cl)C=C(Cl)C2=C1N=CC=C2
DB01244	Bepridil	approved	CC(C)COCC(CN(CC1=CC=CC=C1)C1=CC=CC=C1)N1CCCC1
DB01245	Decamethonium	approved	C[N+](C)(C)CCCCCCCCCC[N+](C)(C)C
DB01246	Alimemazine	approved	CC(CN(C)C)CN1C2=CC=CC=C2SC2=CC=CC=C12
DB01247	Isocarboxazid	approved	CC1=CC(=NO1)C(=O)NNCC1=CC=CC=C1
DB01248	Docetaxel	approved	[H][C@@]1(C[C@@]2(O)[C@@H](OC(=O)C3=CC=CC=C3)[C@]3([H])[C@@]4(CO[C@@H]4C[C@H](O)[C@@]3(C)C(=O)[C@H](O)C(=C1C)C2(C)C)OC(C)=O)OC(=O)[C@H](O)[C@@H](NC(=O)OC(C)(C)C)C1=CC=CC=C1
DB01249	Iodixanol	approved	CC(=O)N(CC(O)CN(C(C)=O)C1=C(I)C(C(=O)NCC(O)CO)=C(I)C(C(=O)NCC(O)CO)=C1I)C1=C(I)C(C(=O)NCC(O)CO)=C(I)C(C(=O)NCC(O)CO)=C1I
DB01250	Olsalazine	approved	OC(=O)C1=CC(=CC=C1O)\N=N\C1=CC=C(O)C(=C1)C(O)=O
DB01251	Gliquidone	approved	COC1=CC2=C(C=C1)C(C)(C)C(=O)N(CCC1=CC=C(C=C1)S(=O)(=O)NC(=O)NC1CCCCC1)C2=O
DB01253	Ergometrine	approved	[H][C@@]12CC3=CNC4=CC=CC(=C34)C1=C[C@H](CN2C)C(=O)N[C@@H](C)CO
DB01254	Dasatinib	approved	CC1=NC(NC2=NC=C(S2)C(=O)NC2=C(C)C=CC=C2Cl)=CC(=N1)N1CCN(CCO)CC1
DB01255	Lisdexamfetamine	approved	C[C@@H](CC1=CC=CC=C1)NC(=O)[C@@H](N)CCCCN
DB01256	Retapamulin	approved	[H][C@@]12C(=O)CC[C@]11CC[C@@H](C)[C@@]2(C)[C@@H](C[C@@](C)(C=C)[C@@H](O)[C@@H]1C)OC(=O)CS[C@H]1C[C@@H]2CC[C@H](C1)N2C
DB01259	Lapatinib	approved	CS(=O)(=O)CCNCC1=CC=C(O1)C1=CC2=C(C=C1)N=CN=C2NC1=CC(Cl)=C(OCC2=CC(F)=CC=C2)C=C1
DB01260	Desonide	approved	[H][C@@]12C[C@H]3OC(C)(C)O[C@@]3(C(=O)CO)[C@@]1(C)C[C@H](O)[C@@]1([H])[C@@]2([H])CCC2=CC(=O)C=C[C@]12C
DB01261	Sitagliptin	approved	N[C@@H](CC(=O)N1CCN2C(C1)=NN=C2C(F)(F)F)CC1=CC(F)=C(F)C=C1F
DB01262	Decitabine	approved	NC1=NC(=O)N(C=N1)[C@H]1C[C@H](O)[C@@H](CO)O1
DB01263	Posaconazole	approved	CC[C@@H]([C@H](C)O)N1N=CN(C1=O)C1=CC=C(C=C1)N1CCN(CC1)C1=CC=C(OC[C@@H]2CO[C@](CN3C=NC=N3)(C2)C2=C(F)C=C(F)C=C2)C=C1
DB01264	Darunavir	approved	[H][C@@]12CCO[C@]1([H])OC[C@@H]2OC(=O)N[C@@H](CC1=CC=CC=C1)[C@H](O)CN(CC(C)C)S(=O)(=O)C1=CC=C(N)C=C1
DB01265	Telbivudine	approved	CC1=CN([C@@H]2C[C@@H](O)[C@H](CO)O2)C(=O)NC1=O
DB01267	Paliperidone	approved	CC1=C(CCN2CCC(CC2)C2=NOC3=C2C=CC(F)=C3)C(=O)N2CCCC(O)C2=N1
DB01268	Sunitinib	approved	CCN(CC)CCNC(=O)C1=C(C)NC(\C=C2/C(=O)NC3=C2C=C(F)C=C3)=C1C
DB01273	Varenicline	approved	C1C2CNCC1C1=C2C=C2N=CC=NC2=C1
DB01274	Arformoterol	approved	COC1=CC=C(C[C@@H](C)NC[C@H](O)C2=CC(NC=O)=C(O)C=C2)C=C1
DB01275	Hydralazine	approved	NNC1=NN=CC2=CC=CC=C12
DB01278	Pramlintide	approved	[H]N[C@@H](CCCCN)C(=O)N[C@H]1CSSC[C@H](NC(=O)[C@@]([H])(NC(=O)[C@H](C)NC(=O)[C@@]([H])(NC(=O)[C@H](CC(N)=O)NC1=O)[C@@H](C)O)[C@@H](C)O)C(=O)N[C@@H](C)C(=O)N[C@@]([H])([C@@H](C)O)C(=O)N[C@@H](CCC(N)=O)C(=O)N[C@@H](CCCNC(N)=N)C(=O)N[C@@H](CC(C)C)C(=O)N[C@@H](C)C(=O)N[C@@H](CC(N)=O)C(=O)N[C@@H](CC1=CC=CC=C1)C(=O)N[C@@H](CC(C)C)C(=O)N[C@@H](C(C)C)C(=O)N[C@@H](CC1=CN=CN1)C(=O)N[C@@H](CO)C(=O)N[C@@H](C…
DB01280	Nelarabine	approved	COC1=NC(N)=NC2=C1N=CN2[C@@H]1O[C@H](CO)[C@@H](O)[C@@H]1O
DB01282	Carbetocin	approved	[H][C@]1(NC(=O)[C@H](CC2=CC=C(OC)C=C2)NC(=O)CCCSC[C@H](NC(=O)[C@H](CC(N)=O)NC(=O)[C@H](CCC(N)=O)NC1=O)C(=O)N1CCC[C@H]1C(=O)N[C@@H](CC(C)C)C(=O)NCC(N)=O)[C@@H](C)CC
DB01283	Lumiracoxib	approved	CC1=CC=C(NC2=C(Cl)C=CC=C2F)C(CC(O)=O)=C1
DB01284	Tetracosactide	approved	CSCC[C@H](NC(=O)[C@H](CO)NC(=O)[C@H](CC1=CC=C(O)C=C1)NC(=O)[C@@H](N)CO)C(=O)N[C@@H](CCC(O)=O)C(=O)N[C@@H](CC1=CN=CN1)C(=O)N[C@@H](CC1=CC=CC=C1)C(=O)N[C@@H](CCCNC(N)=N)C(=O)N[C@@H](CC1=CNC2=C1C=CC=C2)C(=O)NCC(=O)N[C@@H](CCCCN)C(=O)N1CCC[C@H]1C(=O)N[C@@H](C(C)C)C(=O)NCC(=O)N[C@@H](CCCCN)C(=O)N[C@@H](CCCCN)C(=O)N[C@@H](CCCNC(N)=N)C(=O)N[C@@H](CCCNC(N)=N)C(=O)N1CCC[C@H]1C(=O)N[C@@H](C(C)C)C(=O)N[C@@H…
DB01288	Fenoterol	approved	CC(CC1=CC=C(O)C=C1)NCC(O)C1=CC(O)=CC(O)=C1
DB01291	Pirbuterol	approved	CC(C)(C)NCC(O)C1=NC(CO)=C(O)C=C1
DB01294	Bismuth subsalicylate	approved	O[Bi]1OC(=O)C2=CC=CC=C2O1
DB01296	Glucosamine	approved	N[C@H]1C(O)O[C@H](CO)[C@@H](O)[C@@H]1O
DB01297	Practolol	approved	CC(C)NCC(O)COC1=CC=C(NC(C)=O)C=C1
DB01298	Sulfacytine	approved	CCN1C=CC(NS(=O)(=O)C2=CC=C(N)C=C2)=NC1=O
DB01299	Sulfadoxine	approved	COC1=NC=NC(NS(=O)(=O)C2=CC=C(N)C=C2)=C1OC
DB01301	Rolitetracycline	approved	[H][C@@]12C[C@@]3([H])C(C(=O)C4=C(O)C=CC=C4[C@@]3(C)O)=C(O)[C@]1(O)C(=O)C(C(=O)NCN1CCCC1)=C(O)[C@H]2N(C)C
DB01303	Oxtriphylline	approved	C[N+](C)(C)CCO.CN1C2=C([N-]C=N2)C(=O)N(C)C1=O
DB01319	Fosamprenavir	approved	CC(C)CN(C[C@@H](OP(O)(O)=O)[C@H](CC1=CC=CC=C1)NC(=O)O[C@H]1CCOC1)S(=O)(=O)C1=CC=C(N)C=C1
DB01320	Fosphenytoin	approved	OP(O)(=O)OCN1C(=O)NC(C1=O)(C1=CC=CC=C1)C1=CC=CC=C1
DB01322	Kava	approved	COC1=CC(=O)OC(C1)\C=C\C1=CCCC=C1
DB01324	Polythiazide	approved	CN1C(CSCC(F)(F)F)NC2=CC(Cl)=C(C=C2S1(=O)=O)S(N)(=O)=O
DB01325	Quinethazone	approved	CCC1NC(=O)C2=CC(=C(Cl)C=C2N1)S(N)(=O)=O
DB01326	Cefamandole	approved	[H][C@]12SCC(CSC3=NN=NN3C)=C(N1C(=O)[C@H]2NC(=O)[C@H](O)C1=CC=CC=C1)C(O)=O
DB01327	Cefazolin	approved	[H][C@]12SCC(CSC3=NN=C(C)S3)=C(N1C(=O)[C@H]2NC(=O)CN1C=NN=N1)C(O)=O
DB01328	Cefonicid	approved	[H][C@]12SCC(CSC3=NN=NN3CS(O)(=O)=O)=C(N1C(=O)[C@H]2NC(=O)[C@H](O)C1=CC=CC=C1)C(O)=O
DB01329	Cefoperazone	approved	[H][C@]12SCC(CSC3=NN=NN3C)=C(N1C(=O)[C@@]2([H])NC(=O)[C@H](NC(=O)N1CCN(CC)C(=O)C1=O)C1=CC=C(O)C=C1)C(O)=O
DB01330	Cefotetan	approved	[H][C@]12SCC(CSC3=NN=NN3C)=C(N1C(=O)[C@]2(NC(=O)C1SC(S1)=C(C(N)=O)C(O)=O)OC)C(O)=O
DB01331	Cefoxitin	approved	[H][C@]12SCC(COC(N)=O)=C(N1C(=O)[C@]2(NC(=O)CC1=CC=CS1)OC)C(O)=O
DB01332	Ceftizoxime	approved	[H][C@]12SCC=C(N1C(=O)[C@H]2NC(=O)C(=N/OC)\C1=CSC(N)=N1)C(O)=O
DB01333	Cefradine	approved	[H][C@]12SCC(C)=C(N1C(=O)[C@H]2NC(=O)[C@H](N)C1=CCC=CC1)C(O)=O
DB01336	Metocurine	approved	[H][C@@]12CC3=CC=C(OC4=C5C(CC[N+](C)(C)[C@]5([H])CC5=CC(OC6=C(OC)C=C(CC[N+]1(C)C)C2=C6)=C(OC)C=C5)=CC(OC)=C4OC)C=C3
DB01337	Pancuronium	approved	[H][C@@]12C[C@@H]([C@H](OC(C)=O)[C@@]1(C)CC[C@@]1([H])[C@@]2([H])CC[C@@]2([H])C[C@H](OC(C)=O)[C@H](C[C@]12C)[N+]1(C)CCCCC1)[N+]1(C)CCCCC1
DB01338	Pipecuronium	approved	[H][C@@]12C[C@@H]([C@H](OC(C)=O)[C@@]1(C)CC[C@@]1([H])[C@@]2([H])CC[C@@]2([H])C[C@H](OC(C)=O)[C@H](C[C@]12C)N1CC[N+](C)(C)CC1)N1CC[N+](C)(C)CC1
DB01339	Vecuronium	approved	[H][C@@]12C[C@@H]([C@H](OC(C)=O)[C@@]1(C)CC[C@@]1([H])[C@@]2([H])CC[C@@]2([H])C[C@H](OC(C)=O)[C@H](C[C@]12C)N1CCCCC1)[N+]1(C)CCCCC1
DB01340	Cilazapril	approved	CCOC(=O)[C@H](CCC1=CC=CC=C1)N[C@H]1CCCN2CCC[C@H](N2C1=O)C(O)=O
DB01345	Potassium cation	approved	[K+]
DB01346	Quinidine barbiturate	approved	CCC1(C(=O)NC(=O)NC1=O)C1=CC=CC=C1.COC1=CC2=C(C=CN=C2C=C1)C(O)C1CC2CCN1CC2C=C
DB01348	Spirapril	approved	CCOC(=O)[C@H](CCC1=CC=CC=C1)N[C@@H](C)C(=O)N1CC2(C[C@H]1C(O)=O)SCCS2
DB01351	Amobarbital	approved	CCC1(CCC(C)C)C(=O)NC(=O)NC1=O
DB01353	Butobarbital	approved	CCCCC1(CC)C(=O)NC(=O)NC1=O
DB01357	Mestranol	approved	[H][C@@]12CC[C@@](O)(C#C)[C@@]1(C)CC[C@]1([H])C3=C(CC[C@@]21[H])C=C(OC)C=C3
DB01359	Penbutolol	approved	CC(C)(C)NC[C@H](O)COC1=CC=CC=C1C1CCCC1
DB01362	Iohexol	approved	CC(=O)N(CC(O)CO)C1=C(I)C(C(=O)NCC(O)CO)=C(I)C(C(=O)NCC(O)CO)=C1I
DB01364	Ephedrine	approved	CN[C@@H](C)[C@H](O)C1=CC=CC=C1
DB01365	Mephentermine	approved	CNC(C)(C)CC1=CC=CC=C1
DB01366	Procaterol	approved	CC[C@@H](NC(C)C)[C@@H](O)C1=CC=C(O)C2=C1C=CC(=O)N2
DB01367	Rasagiline	approved	C#CCN[C@@H]1CCC2=CC=CC=C12
DB01369	Quinupristin	approved	[H][C@@]12CCCN1C(=O)[C@@H](CC)NC(=O)[C@@H](NC(=O)C1=NC=CC=C1O)[C@@H](C)OC(=O)[C@@H](NC(=O)[C@]1([H])CC(=O)[C@]([H])(CS[C@@H]3CN4CCC3CC4)CN1C(=O)[C@H](CC1=CC=C(C=C1)N(C)C)N(C)C2=O)C1=CC=CC=C1
DB01370	Aluminium	approved	[Al]
DB01377	Magnesium oxide	approved	[O--].[Mg++]
DB01378	Magnesium cation	approved	[Mg++]
DB01380	Cortisone acetate	approved	[H][C@@]12CC[C@](O)(C(=O)COC(C)=O)[C@@]1(C)CC(=O)[C@@]1([H])[C@@]2([H])CCC2=CC(=O)CC[C@]12C
DB01382	Glymidine	approved	COCCOC1=CN=C(NS(=O)(=O)C2=CC=CC=C2)N=C1
DB01390	Sodium bicarbonate	approved	[Na+].OC([O-])=O
DB01392	Yohimbine	approved	[H][C@@]12CC[C@H](O)[C@H](C(=O)OC)[C@@]1([H])C[C@]1([H])N(CCC3=C1NC1=CC=CC=C31)C2
DB01393	Bezafibrate	approved	CC(C)(OC1=CC=C(CCNC(=O)C2=CC=C(Cl)C=C2)C=C1)C(O)=O
DB01394	Colchicine	approved	COC1=CC2=C(C(OC)=C1OC)C1=CC=C(OC)C(=O)C=C1[C@H](CC2)NC(C)=O
DB01395	Drospirenone	approved	[H][C@@]12C[C@]1([H])[C@@]1([H])[C@]3([H])[C@]4([H])C[C@]4([H])[C@@]4(CCC(=O)O4)[C@@]3(C)CC[C@]1([H])[C@@]1(C)CCC(=O)C=C21
DB01396	Digitoxin	approved	[H][C@@]1(CC[C@]2(O)[C@]3([H])CC[C@]4([H])C[C@H](CC[C@]4(C)[C@@]3([H])CC[C@]12C)O[C@H]1C[C@H](O)[C@H](O[C@H]2C[C@H](O)[C@H](O[C@H]3C[C@H](O)[C@H](O)[C@@H](C)O3)[C@@H](C)O2)[C@@H](C)O1)C1=CC(=O)OC1
DB01399	Salsalate	approved	OC(=O)C1=CC=CC=C1OC(=O)C1=CC=CC=C1O
DB01400	Neostigmine	approved	CN(C)C(=O)OC1=CC(=CC=C1)[N+](C)(C)C
DB01401	Choline magnesium trisalicylate	approved	[Mg++].C[N+](C)(C)CCO.OC1=CC=CC=C1C([O-])=O.OC1=CC=CC=C1C([O-])=O.OC1=CC=CC=C1C([O-])=O
DB01403	Methotrimeprazine	approved	COC1=CC2=C(SC3=C(C=CC=C3)N2C[C@H](C)CN(C)C)C=C1
DB01406	Danazol	approved	[H][C@@]12CC[C@@](O)(C#C)[C@@]1(C)CC[C@@]1([H])[C@@]2([H])CCC2=CC3=C(C[C@]12C)C=NO3
DB01407	Clenbuterol	approved	CC(C)(C)NCC(O)C1=CC(Cl)=C(N)C(Cl)=C1
DB01409	Tiotropium	approved	[H][C@]12O[C@@]1([H])[C@]1([H])C[C@@]([H])(C[C@@]2([H])[N+]1(C)C)OC(=O)C(O)(C1=CC=CS1)C1=CC=CS1
DB01410	Ciclesonide	approved	[H][C@@]12C[C@@]3([H])[C@]4([H])CCC5=CC(=O)C=C[C@]5(C)[C@@]4([H])[C@@H](O)C[C@]3(C)[C@@]1(O[C@@H](O2)C1CCCCC1)C(=O)COC(=O)C(C)C
DB01413	Cefepime	approved	CO\N=C(/C(=O)N[C@@H]1C(=O)N2[C@]1([H])SCC(C[N+]1(C)CCCC1)=C2C([O-])=O)C1=CSC(N)=N1
DB01415	Ceftibuten	approved	[H][C@]12SCC=C(N1C(=O)[C@H]2NC(=O)C(=C/CC(O)=O)\C1=CSC(N)=N1)C(O)=O
DB01416	Cefpodoxime	approved	[H][C@]12SCC(COC)=C(N1C(=O)[C@H]2NC(=O)C(=N/OC)\C1=CSC(N)=N1)C(O)=O
DB01418	Acenocoumarol	approved	CC(=O)CC(C1=CC=C(C=C1)[N+]([O-])=O)C1=C(O)C2=CC=CC=C2OC1=O
DB01419	Antrafenine	approved	FC(F)(F)C1=CC(=CC=C1)N1CCN(CCOC(=O)C2=CC=CC=C2NC2=C3C=CC(=CC3=NC=C2)C(F)(F)F)CC1
DB01420	Testosterone propionate	approved	[H][C@@]12CC[C@H](OC(=O)CC)[C@@]1(C)CC[C@@]1([H])[C@@]2([H])CCC2=CC(=O)CC[C@]12C
DB01421	Paromomycin	approved	NC[C@@H]1O[C@H](O[C@@H]2[C@@H](CO)O[C@@H](O[C@@H]3[C@@H](O)[C@H](N)C[C@H](N)[C@H]3O[C@H]3O[C@H](CO)[C@@H](O)[C@H](O)[C@H]3N)[C@@H]2O)[C@H](N)[C@@H](O)[C@@H]1O
DB01424	Aminophenazone	approved	CN(C)C1=C(C)N(C)N(C1=O)C1=CC=CC=C1
DB01426	Ajmaline	approved	[H][C@]12C[C@]34[C@H](O)C1[C@@]1([H])C[C@]([H])(N2[C@H](O)[C@H]1CC)[C@]3([H])N(C)C1=CC=CC=C41
DB01427	Amrinone	approved	NC1=CC(=CNC1=O)C1=CC=NC=C1
DB01428	Oxybenzone	approved	COC1=CC(O)=C(C=C1)C(=O)C1=CC=CC=C1
DB01430	Almitrine	approved	FC1=CC=C(C=C1)C(N1CCN(CC1)C1=NC(NCC=C)=NC(NCC=C)=N1)C1=CC=C(F)C=C1
DB01435	Antipyrine	approved	CN1N(C(=O)C=C1C)C1=CC=CC=C1
DB01436	Alfacalcidol	approved	CC(C)CCC[C@@H](C)[C@@]1([H])CC[C@@]2([H])\C(CCC[C@]12C)=C\C=C1\C[C@@H](O)C[C@H](O)C1=C
DB01437	Glutethimide	approved	CCC1(CCC(=O)NC1=O)C1=CC=CC=C1
DB01438	Phenazopyridine	approved	NC1=NC(N)=C(C=C1)\N=N\C1=CC=CC=C1
DB01440	gamma-Hydroxybutyric acid	approved	OCCCC(O)=O
DB01452	Diamorphine	approved	[H][C@@]12C=C[C@H](OC(C)=O)[C@@H]3OC4=C(OC(C)=O)C=CC5=C4[C@]13CCN(C)[C@@H]2C5
DB01495	Dichloralphenazone	approved	OC(O)C(Cl)(Cl)Cl.OC(O)C(Cl)(Cl)Cl.CN1N(C(=O)C=C1C)C1=CC=CC=C1
DB01501	Difenoxin	approved	OC(=O)C1(CCN(CCC(C#N)(C2=CC=CC=C2)C2=CC=CC=C2)CC1)C1=CC=CC=C1
DB01544	Flunitrazepam	approved	CN1C2=C(C=C(C=C2)[N+]([O-])=O)C(=NCC1=O)C1=CC=CC=C1F
DB01551	Dihydrocodeine	approved	[H][C@@]12OC3=C4C(C[C@H]5N(C)CC[C@@]14[C@@]5([H])CC[C@@H]2O)=CC=C3OC
DB01558	Bromazepam	approved	BrC1=CC2=C(NC(=O)CN=C2C2=CC=CC=N2)C=C1
DB01559	Clotiazepam	approved	CCC1=CC2=C(S1)N(C)C(=O)CN=C2C1=CC=CC=C1Cl
DB01563	Chloral hydrate	approved	OC(O)C(Cl)(Cl)Cl
DB01574	Attapulgite	approved	[O--].[O--].[O--].[O--].[O--].[O--].[O--].[O--].[O--].[O--].[Mg++].[Al+3].[Si+4].[Si+4].[Si+4].[Si+4].[O-][H].[H]O[H].[H]O[H].[H]O[H].[H]O[H]
DB01575	Kaolin	approved	O.O.[Al+3].[Al+3].[O-][Si]([O-])([O-])O[Si]([O-])([O-])[O-]
DB01576	Dextroamphetamine	approved	C[C@H](N)CC1=CC=CC=C1
DB01577	Metamfetamine	approved	CN[C@@H](C)CC1=CC=CC=C1
DB01579	Phendimetrazine	approved	C[C@H]1[C@@H](OCCN1C)C1=CC=CC=C1
DB01580	Oxprenolol	approved	CC(C)NCC(O)COC1=CC=CC=C1OCC=C
DB01581	Sulfamerazine	approved	CC1=NC(NS(=O)(=O)C2=CC=C(N)C=C2)=NC=C1
DB01582	Sulfamethazine	approved	CC1=CC(C)=NC(NS(=O)(=O)C2=CC=C(N)C=C2)=N1
DB01583	Liotrix	approved	[Na+].[Na+].N[C@@H](CC1=CC(I)=C(OC2=CC(I)=C(O)C=C2)C(I)=C1)C([O-])=O.N[C@@H](CC1=CC(I)=C(OC2=CC(I)=C(O)C(I)=C2)C(I)=C1)C([O-])=O
DB01586	Ursodeoxycholic acid	approved	[H][C@@]1(CC[C@@]2([H])[C@]3([H])[C@@H](O)C[C@]4([H])C[C@H](O)CC[C@]4(C)[C@@]3([H])CC[C@]12C)[C@H](C)CCC(O)=O
DB01587	Ketazolam	approved	CN1C2=C(C=C(Cl)C=C2)C2(OC(C)=CC(=O)N2CC1=O)C1=CC=CC=C1
DB01588	Prazepam	approved	ClC1=CC2=C(C=C1)N(CC1CC1)C(=O)CN=C2C1=CC=CC=C1
DB01589	Quazepam	approved	FC1=CC=CC=C1C1=NCC(=S)N(CC(F)(F)F)C2=C1C=C(Cl)C=C2
DB01590	Everolimus	approved	[H][C@@]1(C[C@@H](C)[C@]2([H])CC(=O)[C@H](C)\C=C(C)\[C@@H](O)[C@@H](OC)C(=O)[C@H](C)C[C@H](C)\C=C\C=C\C=C(C)\[C@H](C[C@]3([H])CC[C@@H](C)[C@@](O)(O3)C(=O)C(=O)N3CCCC[C@@]3([H])C(=O)O2)OC)CC[C@@H](OCCO)[C@@H](C1)OC
DB01591	Solifenacin	approved	O=C(O[C@H]1CN2CCC1CC2)N1CCC2=CC=CC=C2[C@@H]1C1=CC=CC=C1
DB01592	Iron	approved	[Fe]
DB01593	Zinc	approved	[Zn]
DB01595	Nitrazepam	approved	[O-][N+](=O)C1=CC2=C(NC(=O)CN=C2C2=CC=CC=C2)C=C1
DB01597	Cilastatin	approved	CC1(C)C[C@@H]1C(=O)N\C(=C/CCCCSC[C@H](N)C(O)=O)C(O)=O
DB01598	Imipenem	approved	[H][C@]12CC(SCC\N=C\N)=C(N1C(=O)[C@]2([H])[C@@H](C)O)C(O)=O
DB01599	Probucol	approved	CC(C)(SC1=CC(=C(O)C(=C1)C(C)(C)C)C(C)(C)C)SC1=CC(=C(O)C(=C1)C(C)(C)C)C(C)(C)C
DB01600	Tiaprofenic acid	approved	CC(C(O)=O)C1=CC=C(S1)C(=O)C1=CC=CC=C1
DB01601	Lopinavir	approved	CC(C)[C@H](N1CCCNC1=O)C(=O)N[C@H](C[C@H](O)[C@H](CC1=CC=CC=C1)NC(=O)COC1=C(C)C=CC=C1C)CC1=CC=CC=C1
DB01602	Bacampicillin	approved	[H][C@]12SC(C)(C)[C@@H](N1C(=O)[C@H]2NC(=O)[C@H](N)C1=CC=CC=C1)C(=O)OC(C)OC(=O)OCC
DB01603	Meticillin	approved	[H][C@]12SC(C)(C)[C@@H](N1C(=O)[C@H]2NC(=O)C1=C(OC)C=CC=C1OC)C(O)=O
DB01604	Pivampicillin	approved	[H][C@]12SC(C)(C)[C@@H](N1C(=O)[C@H]2NC(=O)[C@H](N)C1=CC=CC=C1)C(=O)OCOC(=O)C(C)(C)C
DB01605	Pivmecillinam	approved	[H]C(=N[C@@H]1C(=O)N2[C@@H](C(=O)OCOC(=O)C(C)(C)C)C(C)(C)S[C@]12[H])N1CCCCCC1
DB01606	Tazobactam	approved	[H][C@@]12CC(=O)N1[C@@H](C(O)=O)[C@](C)(CN1C=CN=N1)S2(=O)=O
DB01607	Ticarcillin	approved	[H][C@]12SC(C)(C)[C@@H](N1C(=O)[C@H]2NC(=O)[C@H](C(O)=O)C1=CSC=C1)C(O)=O
DB01608	Periciazine	approved	OC1CCN(CCCN2C3=CC=CC=C3SC3=C2C=C(C=C3)C#N)CC1
DB01609	Deferasirox	approved	OC(=O)C1=CC=C(C=C1)N1N=C(N=C1C1=CC=CC=C1O)C1=CC=CC=C1O
DB01610	Valganciclovir	approved	CC(C)[C@H](N)C(=O)OCC(CO)OCN1C=NC2=C1NC(N)=NC2=O
DB01611	Hydroxychloroquine	approved	CCN(CCO)CCCC(C)NC1=C2C=CC(Cl)=CC2=NC=C1
DB01612	Amyl Nitrite	approved	CCCCCON=O
DB01613	Erythrityl tetranitrate	approved	[O-][N+](=O)OC[C@@H](O[N+]([O-])=O)[C@H](CO[N+]([O-])=O)O[N+]([O-])=O
DB01616	Alverine	approved	CCN(CCCC1=CC=CC=C1)CCCC1=CC=CC=C1
DB01618	Molindone	approved	CCC1=C(C)NC2=C1C(=O)C(CN1CCOCC1)CC2
DB01619	Phenindamine	approved	CN1CCC2=C(C1)C(C1=CC=CC=C21)C1=CC=CC=C1
DB01620	Pheniramine	approved	CN(C)CCC(C1=CC=CC=C1)C1=CC=CC=N1
DB01621	Pipotiazine	approved	CN(C)S(=O)(=O)C1=CC2=C(SC3=CC=CC=C3N2CCCN2CCC(CCO)CC2)C=C1
DB01623	Thiothixene	approved	CN(C)S(=O)(=O)C1=CC2=C(SC3=CC=CC=C3\C2=C\CCN2CCN(C)CC2)C=C1
DB01624	Zuclopenthixol	approved	OCCN1CCN(CC\C=C2\C3=C(SC4=C2C=C(Cl)C=C4)C=CC=C3)CC1
DB01625	Isopropamide	approved	CC(C)[N+](C)(CCC(C(N)=O)(C1=CC=CC=C1)C1=CC=CC=C1)C(C)C
DB01626	Pargyline	approved	CN(CC#C)CC1=CC=CC=C1
DB01627	Lincomycin	approved	[H][C@]1(C[C@@H](CCC)CN1C)C(=O)N[C@H]([C@@H](C)O)[C@H]1O[C@H](SC)[C@H](O)[C@@H](O)[C@H]1O
DB01628	Etoricoxib	approved	CC1=NC=C(C=C1)C1=C(C=C(Cl)C=N1)C1=CC=C(C=C1)S(C)(=O)=O
DB01632	5-O-phosphono-alpha-D-ribofuranosyl diphosphate	approved	O[C@H]1[C@@H](O)[C@@H](OP(O)(=O)OP(O)(O)=O)O[C@@H]1COP(O)(O)=O
DB01638	Sorbitol	approved	OC[C@H](O)[C@@H](O)[C@H](O)[C@H](O)CO
DB01656	Roflumilast	approved	FC(F)OC1=C(OCC2CC2)C=C(C=C1)C(=O)NC1=C(Cl)C=NC=C1Cl
DB01698	Rutin	approved	C[C@@H]1O[C@@H](OC[C@H]2O[C@@H](OC3=C(OC4=CC(O)=CC(O)=C4C3=O)C3=CC(O)=C(O)C=C3)[C@H](O)[C@@H](O)[C@@H]2O)[C@H](O)[C@H](O)[C@H]1O
DB01708	Prasterone	approved	[H][C@@]12CCC(=O)[C@@]1(C)CC[C@@]1([H])[C@@]2([H])CC=C2C[C@@]([H])(O)CC[C@]12C
DB01718	Cetrimonium	approved	CCCCCCCCCCCCCCCC[N+](C)(C)C
DB01744	Camphor	approved	[H][C@@]12CC[C@@](C)(C(=O)C1)C2(C)C
DB01764	Dalfopristin	approved	CCN(CC)CCS(=O)(=O)[C@@H]1CCN2[C@H]1C(=O)O[C@H](C(C)C)[C@H](C)\C=C\C(=O)NC\C=C\C(\C)=C\[C@@H](O)CC(=O)CC1=NC(=CO1)C2=O
DB01783	Pantothenic acid	approved	CC(C)(CO)[C@@H](O)C(=O)NCCC(O)=O
DB01839	Propylene glycol	approved	CC(O)CO
DB01914	D-glucose	approved	[H][C@@](O)(CO)[C@@]([H])(O)[C@]([H])(O)[C@@]([H])(O)C=O
DB01956	Taurine	approved	NCCS(O)(=O)=O
DB01987	Cocarboxylase	approved	CC1=C(CCO[P@](O)(=O)O[P@](O)([O-])=O)SC=[N+]1CC1=CN=C(C)N=C1N
DB02266	Flufenamic acid	approved	OC(=O)C1=CC=CC=C1NC1=CC(=CC=C1)C(F)(F)F
DB02300	Calcipotriol	approved	O[C@H](\C=C\[C@@H](C)[C@@]1([H])CC[C@@]2([H])\C(CCC[C@]12C)=C\C=C1\C[C@@H](O)C[C@H](O)C1=C)C1CC1
DB02325	Isopropyl alcohol	approved	CC(C)O
DB02362	Aminobenzoic acid	approved	NC1=CC=C(C=C1)C(O)=O
DB02513	Thymol	approved	CC(C)C1=CC=C(C)C=C1O
DB02530	gamma-Aminobutyric acid	approved	NCCCC(O)=O
DB02546	Vorinostat	approved	ONC(=O)CCCCCCC(=O)NC1=CC=CC=C1
DB02659	Cholic Acid	approved	[H][C@@](C)(CCC(O)=O)[C@@]1([H])CC[C@@]2([H])[C@]3([H])[C@]([H])(O)C[C@]4([H])C[C@]([H])(O)CC[C@]4(C)[C@@]3([H])C[C@]([H])(O)[C@]12C
DB02701	Nicotinamide	approved	NC(=O)C1=CC=CN=C1
DB02703	Fusidic acid	approved	[H][C@@]12C[C@@H](O)[C@@]3([H])[C@@]4(C)CC[C@@H](O)[C@@H](C)[C@]4([H])CC[C@]3(C)[C@@]1(C)C[C@H](OC(C)=O)\C2=C(\CCC=C(C)C)C(O)=O
DB02772	Sucrose	approved	OC[C@H]1O[C@@](CO)(O[C@H]2O[C@H](CO)[C@@H](O)[C@H](O)[C@H]2O)[C@@H](O)[C@@H]1O
DB02789	Pregnenolone	approved	[H][C@@]12CC[C@H](C(C)=O)[C@@]1(C)CC[C@@]1([H])[C@@]2([H])CC=C2C[C@@H](O)CC[C@]12C
DB02893	D-Methionine	approved	CSCC[C@@H](N)C(O)=O
DB02925	Piretanide	approved	NS(=O)(=O)C1=CC(=CC(N2CCCC2)=C1OC1=CC=CC=C1)C(O)=O
DB02959	Oxitriptan	approved	N[C@@H](CC1=CNC2=C1C=C(O)C=C2)C(O)=O
DB03017	Lauric acid	approved	CCCCCCCCCCCC(O)=O
DB03085	Glycolic acid	approved	OCC(O)=O
DB03088	Pidolic acid	approved	OC(=O)[C@@H]1CCC(=O)N1
DB03128	Acetylcholine	approved	CC(=O)OCC[N+](C)(C)C
DB03147	Flavin adenine dinucleotide	approved	CC1=CC2=C(C=C1C)N(C[C@H](O)[C@H](O)[C@H](O)CO[P@](O)(=O)O[P@@](O)(=O)OC[C@H]1O[C@H]([C@H](O)[C@@H]1O)N1C=NC3=C1N=CN=C3N)C1=NC(=O)NC(=O)C1=N2
DB03166	Acetic acid	approved	CC(O)=O
DB03175	Propyl alcohol	approved	CCCO
DB03193	Stearic acid	approved	CCCCCCCCCCCCCCCCCC(O)=O
DB03209	Oteracil	approved	OC(=O)C1=NC(=O)NC(=O)N1
DB03247	Flavin mononucleotide	approved	CC1=CC2=C(C=C1C)N(C[C@H](O)[C@H](O)[C@H](O)COP(O)(O)=O)C1=NC(=O)NC(=O)C1=N2
DB03255	Phenol	approved	OC1=CC=CC=C1
DB03310	Glutathione disulfide	approved	N[C@@H](CCC(=O)N[C@@H](CSSC[C@H](NC(=O)CC[C@H](N)C(O)=O)C(=O)NCC(O)=O)C(=O)NCC(O)=O)C(O)=O
DB03312	Brivudine	approved	OC[C@H]1O[C@H](C[C@@H]1O)N1C=C(\C=C\Br)C(=O)NC1=O
DB03585	Oxyphenbutazone	approved	CCCCC1C(=O)N(N(C1=O)C1=CC=C(O)C=C1)C1=CC=CC=C1
DB03614	Mecobalamin	approved	C1(CC[C@@]2([C@@H](CC(N)=O)[C@@]3([C@@]4([N+]5=C([C@H]([C@@]4(CC(N)=O)C)CCC(N)=O)C(C)=C4[N+]6=C(C=C7[N+]8=C([C@H](C7(C)C)CCC(N)=O)C(C)=C2N3[Co-3]568([N+]2=CN([C@H]3O[C@@H]([C@@H](OP(O[C@@H](CN1)C)([O-])=O)[C@H]3O)CO)C1=CC(C)=C(C=C21)C)C)[C@H]([C@@]4(CC(N)=O)C)CCC(N)=O)C)[H])C)=O
DB03615	Ribostamycin	approved	[H][C@@]1(O[C@@H]2[C@@H](O)[C@H](N)C[C@H](N)[C@H]2O[C@H]2O[C@H](CN)[C@@H](O)[C@H](O)[C@H]2N)O[C@H](CO)[C@@H](O)[C@H]1O
DB03619	Deoxycholic acid	approved	[H][C@@]12CC[C@H]([C@H](C)CCC(O)=O)[C@@]1(C)[C@@H](O)C[C@@]1([H])[C@@]2([H])CC[C@]2([H])C[C@H](O)CC[C@]12C
DB03754	Tromethamine	approved	NC(CO)(CO)CO
DB03756	Doconexent	approved	CC\C=C/C\C=C/C\C=C/C\C=C/C\C=C/C\C=C/CCC(O)=O
DB03766	Propanoic acid	approved	CCC(O)=O
DB03793	Benzoic acid	approved	OC(=O)C1=CC=CC=C1
DB03796	Palmitic Acid	approved	CCCCCCCCCCCCCCCC(O)=O
DB03808	Hexamidine	approved	NC(=N)C1=CC=C(OCCCCCCOC2=CC=C(C=C2)C(N)=N)C=C1
DB03843	Formaldehyde	approved	[H]C([H])=O
DB03904	Urea	approved	NC(N)=O
DB03929	D-Serine	approved	N[C@H](CO)C(O)=O
DB04038	Ergosterol	approved	CC(C)[C@@H](C)\C=C\[C@@H](C)[C@H]1CC[C@H]2C3=CC=C4C[C@@H](O)CC[C@]4(C)[C@H]3CC[C@]12C
DB04115	Berberine	approved	COC1=CC=C2C=C3C4=CC5=C(OCO5)C=C4CC[N+]3=CC2=C1OC
DB04160	Pyrophosphoric acid	approved	OP(O)(=O)OP(O)(O)=O
DB04173	Fructose	approved	OC[C@@H]1O[C@@](O)(CO)[C@H](O)[C@H]1O
DB04209	Dequalinium	approved	CC1=CC(N)=C2C=CC=CC2=[N+]1CCCCCCCCCC[N+]1=C(C)C=C(N)C2=C1C=CC=C2
DB04221	Didecyldimethylammonium	approved	CCCCCCCCCC[N+](C)(C)CCCCCCCCCC
DB04224	Oleic Acid	approved	CCCCCCCC\C=C\CCCCCCCC(O)=O
DB04272	Citric acid	approved	OC(=O)CC(O)(CC(O)=O)C(O)=O
DB04339	Carbocisteine	approved	N[C@@H](CSCC(O)=O)C(O)=O
DB04348	Taurocholic acid	approved	[H][C@@]1(CC[C@@]2([H])[C@]3([H])[C@H](O)C[C@]4([H])C[C@H](O)CC[C@]4(C)[C@@]3([H])C[C@H](O)[C@]12C)[C@H](C)CCC(=O)NCCS(O)(=O)=O
DB04398	Lactic acid	approved	CC(O)C(O)=O
DB04465	Lactose	approved	OC[C@H]1O[C@@H](O[C@H]2[C@H](O)[C@@H](O)C(O)O[C@@H]2CO)[C@H](O)[C@@H](O)[C@H]1O
DB04540	Cholesterol	approved	[H][C@@]1(CC[C@@]2([H])[C@]3([H])CC=C4C[C@@H](O)CC[C@]4(C)[C@@]3([H])CC[C@]12C)[C@H](C)CCCC(C)C
DB04564	Gluconolactone	approved	OC[C@H]1OC(=O)[C@H](O)[C@@H](O)[C@@H]1O
DB04570	Latamoxef	approved	[H][C@]12OCC(CSC3=NN=NN3C)=C(N1C(=O)[C@]2(NC(=O)C(C(O)=O)C1=CC=C(O)C=C1)OC)C(O)=O
DB04571	Trioxsalen	approved	CC1=CC2=CC3=C(OC(=O)C=C3C)C(C)=C2O1
DB04572	Thiotepa	approved	S=P(N1CC1)(N1CC1)N1CC1
DB04573	Estriol	approved	[H][C@@]12C[C@@H](O)[C@H](O)[C@@]1(C)CC[C@]1([H])C3=C(CC[C@@]21[H])C=C(O)C=C3
DB04574	Estrone sulfate	approved	[H][C@@]12CCC(=O)[C@@]1(C)CC[C@]1([H])C3=C(CC[C@@]21[H])C=C(OS(O)(=O)=O)C=C3
DB04575	Quinestrol	approved	[H][C@@]12CC[C@@](O)(C#C)[C@@]1(C)CC[C@]1([H])C3=C(CC[C@@]21[H])C=C(OC1CCCC1)C=C3
DB04657	Carboxin	approved	CC1=C(SCCO1)C(=O)NC1=CC=CC=C1
DB04703	Hesperidin	approved	COC1=CC=C(C=C1O)[C@@H]1CC(=O)C2=C(O1)C=C(O[C@@H]1O[C@H](CO[C@@H]3O[C@@H](C)[C@H](O)[C@@H](O)[C@H]3O)[C@@H](O)[C@H](O)[C@H]1O)C=C2O
DB04711	Iodipamide	approved	OC(=O)C1=C(I)C(NC(=O)CCCCC(=O)NC2=C(I)C=C(I)C(C(O)=O)=C2I)=C(I)C=C1I
DB04743	Nimesulide	approved	CS(=O)(=O)NC1=C(OC2=CC=CC=C2)C=C(C=C1)[N+]([O-])=O
DB04794	Bifonazole	approved	C1=CN(C=N1)C(C1=CC=CC=C1)C1=CC=C(C=C1)C1=CC=CC=C1
DB04812	Benoxaprofen	approved	CC(C(O)=O)C1=CC2=C(OC(=N2)C2=CC=C(Cl)C=C2)C=C1
DB04813	Bithionol	approved	OC1=C(SC2=C(O)C(Cl)=CC(Cl)=C2)C=C(Cl)C=C1Cl
DB04815	Clioquinol	approved	OC1=C(I)C=C(Cl)C2=C1N=CC=C2
DB04816	Dantron	approved	OC1=CC=CC2=C1C(=O)C1=C(C=CC=C1O)C2=O
DB04817	Metamizole	approved	CN(CS(O)(=O)=O)C1=C(C)N(C)N(C1=O)C1=CC=CC=C1
DB04820	Nialamide	approved	O=C(CCNNC(=O)C1=CC=NC=C1)NCC1=CC=CC=C1
DB04821	Nomifensine	approved	CN1CC(C2=CC=CC=C2)C2=C(C1)C(N)=CC=C2
DB04822	Oxeladin	approved	CCN(CC)CCOCCOC(=O)C(CC)(CC)C1=CC=CC=C1
DB04824	Phenolphthalein	approved	OC1=CC=C(C=C1)C1(OC(=O)C2=CC=CC=C12)C1=CC=C(O)C=C1
DB04825	Prenylamine	approved	CC(CC1=CC=CC=C1)NCCC(C1=CC=CC=C1)C1=CC=CC=C1
DB04826	Thenalidine	approved	CN1CCC(CC1)N(CC1=CC=CS1)C1=CC=CC=C1
DB04827	Urethane	approved	CCOC(N)=O
DB04832	Zimelidine	approved	CN(C)C\C=C(\C1=CC=C(Br)C=C1)C1=CC=CN=C1
DB04834	Rapacuronium	approved	[H][C@@]12C[C@@H]([C@H](OC(=O)CC)[C@@]1(C)CC[C@@]1([H])[C@@]2([H])CC[C@@]2([H])C[C@H](OC(C)=O)[C@H](C[C@]12C)N1CCCCC1)[N+]1(CC=C)CCCCC1
DB04835	Maraviroc	approved	CC(C)C1=NN=C(C)N1[C@H]1C[C@@H]2CC[C@H](C1)N2CC[C@H](NC(=O)C1CCC(F)(F)CC1)C1=CC=CC=C1
DB04837	Clofedanol	approved	CN(C)CCC(O)(C1=CC=CC=C1)C1=CC=CC=C1Cl
DB04838	Cyclandelate	approved	CC1CC(CC(C)(C)C1)OC(=O)C(O)C1=CC=CC=C1
DB04839	Cyproterone acetate	approved	[H][C@@]12C[C@]1([H])[C@@]1(C)C(=CC2=O)C(Cl)=C[C@@]2([H])[C@]3([H])CC[C@](OC(C)=O)(C(C)=O)[C@@]3(C)CC[C@]12[H]
DB04840	Debrisoquine	approved	NC(=N)N1CCC2=CC=CC=C2C1
DB04841	Flunarizine	approved	FC1=CC=C(C=C1)C(N1CCN(C\C=C\C2=CC=CC=C2)CC1)C1=CC=C(F)C=C1
DB04842	Fluspirilene	approved	FC1=CC=C(C=C1)C(CCCN1CCC2(CC1)N(CNC2=O)C1=CC=CC=C1)C1=CC=C(F)C=C1
DB04843	Mepenzolate	approved	C[N+]1(C)CCCC(C1)OC(=O)C(O)(C1=CC=CC=C1)C1=CC=CC=C1
DB04844	Tetrabenazine	approved	COC1=C(OC)C=C2C3CC(=O)C(CC(C)C)CN3CCC2=C1
DB04845	Ixabepilone	approved	[H][C@]12C[C@H](NC(=O)C[C@H](O)C(C)(C)C(=O)[C@H](C)[C@@H](O)[C@@H](C)CCC[C@@]1(C)O2)C(\C)=C\C1=CSC(C)=N1
DB04846	Celiprolol	approved	CCN(CC)C(=O)NC1=CC=C(OCC(O)CNC(C)(C)C)C(=C1)C(C)=O
DB04847	Roxadustat	approved	CC1=NC(C(=O)NCC(O)=O)=C(O)C2=C1C=C(OC1=CC=CC=C1)C=C2
DB04854	Febuxostat	approved	CC(C)COC1=C(C=C(C=C1)C1=NC(C)=C(S1)C(O)=O)C#N
DB04855	Dronedarone	approved	CCCCN(CCCC)CCCOC1=CC=C(C=C1)C(=O)C1=C(CCCC)OC2=C1C=C(NS(C)(=O)=O)C=C2
DB04861	Nebivolol	approved	OC(CNCC(O)C1CCC2=C(O1)C=CC(F)=C2)C1CCC2=C(O1)C=CC(F)=C2
DB04864	Huperzine A	approved	[H][C@@]12CC3=C(C=CC(=O)N3)[C@@](N)(CC(C)=C1)\C2=C\C
DB04865	Omacetaxine mepesuccinate	approved	[H][C@@]1(OC(=O)[C@@](O)(CCCC(C)(C)O)CC(=O)OC)C(OC)=C[C@]23CCCN2CCC2=CC4=C(OCO4)C=C2[C@]13[H]
DB04868	Nilotinib	approved	CC1=CN(C=N1)C1=CC(NC(=O)C2=CC=C(C)C(NC3=NC=CC(=N3)C3=CN=CC=C3)=C2)=CC(=C1)C(F)(F)F
DB04871	Lorcaserin	approved	C[C@H]1CNCCC2=CC=C(Cl)C=C12
DB04876	Vildagliptin	approved	OC12CC3CC(C1)CC(C3)(C2)NCC(=O)N1CCC[C@H]1C#N
DB04880	Enoximone	approved	CSC1=CC=C(C=C1)C(=O)C1=C(C)NC(=O)N1
DB04890	Bepotastine	approved	OC(=O)CCCN1CCC(CC1)OC(C1=CC=C(Cl)C=C1)C1=CC=CC=N1
DB04896	Milnacipran	approved	CCN(CC)C(=O)C1(CC1CN)C1=CC=CC=C1
DB04898	Ximelagatran	approved	CCOC(=O)CN[C@@H](C(=O)N1CC[C@H]1C(=O)NCC1=CC=C(C=C1)C(\N)=N\O)C1CCCCC1
DB04908	Flibanserin	approved	FC(F)(F)C1=CC(=CC=C1)N1CCN(CCN2C(=O)NC3=CC=CC=C23)CC1
DB04911	Oritavancin	approved	CN[C@H](CC(C)C)C(=O)N[C@@H]1[C@H](O)C2=CC=C(OC3=C(O[C@@H]4O[C@H](CO)[C@@H](O)[C@H](O)[C@H]4O[C@H]4C[C@](C)(NCC5=CC=C(C=C5)C5=CC=C(Cl)C=C5)[C@@H](O)[C@H](C)O4)C4=CC(=C3)[C@@H](NC(=O)[C@H](CC(N)=O)NC1=O)C(=O)N[C@@H]1C3=CC(=C(O)C=C3)C3=C(O)C=C(O)C=C3[C@H](NC(=O)[C@@H](NC1=O)[C@H](O[C@H]1C[C@](C)(N)[C@@H](O)[C@H](C)O1)C1=CC(Cl)=C(O4)C=C1)C(O)=O)C(Cl)=C2
DB04918	Ceftobiprole	approved	[H][C@@]1(NC(=O)C(=N/O)\C2=NSC(N)=N2)C(=O)N2C(C(O)=O)=C(CS[C@]12[H])\C=C1/CCN(C1=O)[C@]1([H])CCNC1
DB04920	Clevidipine	approved	CCCC(=O)OCOC(=O)C1=C(C)NC(C)=C(C1C1=CC=CC(Cl)=C1Cl)C(=O)OC
DB04930	Permethrin	approved	CC1(C)C(C=C(Cl)Cl)C1C(=O)OCC1=CC(OC2=CC=CC=C2)=CC=C1
DB04931	Afamelanotide	approved	CCCC[C@H](NC(=O)[C@H](CO)NC(=O)[C@H](CC1=CC=C(O)C=C1)NC(=O)[C@H](CO)NC(C)=O)C(=O)N[C@@H](CCC(O)=O)C(=O)N[C@@H](CC1=CN=CN1)C(=O)N[C@H](CC1=CC=CC=C1)C(=O)N[C@@H](CCCNC(N)=N)C(=O)N[C@@H](CC1=CNC2=CC=CC=C12)C(=O)NCC(=O)N[C@@H](CCCCN)C(=O)N1CCC[C@H]1C(=O)N[C@@H](C(C)C)C(N)=O
DB04938	Ospemifene	approved	OCCOC1=CC=C(C=C1)C(=C(\CCCl)C1=CC=CC=C1)\C1=CC=CC=C1
DB04946	Iloperidone	approved	COC1=C(OCCCN2CCC(CC2)C2=NOC3=C2C=CC(F)=C3)C=CC(=C1)C(C)=O
DB04948	Lofexidine	approved	CC(OC1=C(Cl)C=CC=C1Cl)C1=NCCN1
DB04951	Pirfenidone	approved	CC1=CN(C(=O)C=C1)C1=CC=CC=C1
DB04953	Ezogabine	approved	CCOC(=O)NC1=C(N)C=C(NCC2=CC=C(F)C=C2)C=C1
DB05013	Ingenol mebutate	approved	[H][C@@]12C[C@@H](C)[C@]34C=C(C)[C@H](OC(=O)C(\C)=C/C)[C@@]3(O)[C@H](O)C(CO)=C[C@@]([H])(C4=O)[C@]1([H])C2(C)C
DB05015	Belinostat	approved	ONC(=O)\C=C\C1=CC=CC(=C1)S(=O)(=O)NC1=CC=CC=C1
DB05016	Ataluren	approved	OC(=O)C1=CC=CC(=C1)C1=NOC(=N1)C1=CC=CC=C1F
DB05018	Migalastat	approved	OC[C@H]1NC[C@H](O)[C@@H](O)[C@H]1O
DB05039	Indacaterol	approved	CCC1=C(CC)C=C2CC(CC2=C1)NC[C@H](O)C1=C2C=CC(=O)NC2=C(O)C=C1
DB05057	Erdosteine	approved	OC(=O)CSCC(=O)NC1CCSC1=O
DB05087	Ganaxolone	approved	[H][C@@]12CC[C@H](C(C)=O)[C@@]1(C)CC[C@@]1([H])[C@@]2([H])CC[C@@]2([H])C[C@](C)(O)CC[C@]12C
DB05109	Trabectedin	approved	[H][C@@]12[C@@H]3SC[C@]4(NCCC5=C4C=C(OC)C(O)=C5)C(=O)OC[C@H](N1[C@@H](O)[C@@H]1CC4=CC(C)=C(OC)C(O)=C4[C@H]2N1C)C1=C2OCOC2=C(C)C(OC(C)=O)=C31
DB05154	Pretomanid	approved	[O-][N+](=O)C1=CN2C[C@@H](COC2=N1)OCC1=CC=C(OC(F)(F)F)C=C1
DB05219	Crisaborole	approved	OB1OCC2=C1C=CC(OC1=CC=C(C=C1)C#N)=C2
DB05239	Cobimetinib	approved	OC1(CN(C1)C(=O)C1=C(NC2=C(F)C=C(I)C=C2)C(F)=C(F)C=C1)[C@@H]1CCCCN1
DB05245	Silver sulfadiazine	approved	[Ag+].NC1=CC=C(C=C1)S(=O)(=O)[N-]C1=NC=CC=N1
DB05246	Methsuximide	approved	CN1C(=O)CC(C)(C1=O)C1=CC=CC=C1
DB05260	Gallium nitrate	approved	[Ga+3].[O-][N+]([O-])=O.[O-][N+]([O-])=O.[O-][N+]([O-])=O
DB05271	Rotigotine	approved	CCCN(CCC1=CC=CS1)[C@H]1CCC2=C(O)C=CC=C2C1
DB05273	Samarium (153Sm) lexidronam	approved	[153Sm+3].OP(O)(=O)CN(CCN(CP(O)([O-])=O)CP(O)([O-])=O)CP(O)([O-])=O
DB05294	Vandetanib	approved	COC1=C(OCC2CCN(C)CC2)C=C2N=CN=C(NC3=C(F)C=C(Br)C=C3)C2=C1
DB05316	Pimavanserin	approved	CC(C)COC1=CC=C(CNC(=O)N(CC2=CC=C(F)C=C2)C2CCN(C)CC2)C=C1
DB05351	Dexlansoprazole	approved	CC1=C(OCC(F)(F)F)C=CN=C1C[S@@](=O)C1=NC2=CC=CC=C2N1
DB05381	Histamine	approved	NCCC1=CNC=N1
DB05382	Iodine	approved	II
DB05389	Tetrachlorodecaoxide	approved	O.O=O.[O-][Cl]=O.[O-][Cl]=O.[O-][Cl]=O.[O-][Cl]=O
DB05467	Palovarotene	approved	CC1(C)CCC(C)(C)C2=C1C=C(CN1C=CC=N1)C(\C=C\C1=CC=C(C=C1)C(O)=O)=C2
DB05521	Telaprevir	approved	[H][C@@]12CCC[C@]1([H])[C@H](N(C2)C(=O)[C@@H](NC(=O)[C@@H](NC(=O)C1=NC=CN=C1)C1CCCCC1)C(C)(C)C)C(=O)N[C@@H](CCC)C(=O)C(=O)NC1CC1
DB05541	Brivaracetam	approved	CCC[C@H]1CN([C@@H](CC)C(N)=O)C(=O)C1
DB05630	Sodium stibogluconate	approved	O.O.O.O.O.O.O.O.O.[Na+].[Na+].[Na+].[H][C@@]1(O[Sb]2(O)(O[Sb]34([O-])O[C@@H](C([O-])=O)[C@@]([H])(O3)[C@]([H])(O4)[C@H](O)CO)O[C@@H](C([O-])=O)[C@@]1([H])O2)[C@H](O)CO
DB05667	Levoketoconazole	approved	CC(=O)N1CCN(CC1)C1=CC=C(OC[C@@H]2CO[C@](CN3C=CN=C3)(O2)C2=CC=C(Cl)C=C2Cl)C=C1
DB05676	Apremilast	approved	CCOC1=CC(=CC=C1OC)[C@@H](CS(C)(=O)=O)N1C(=O)C2=CC=CC(NC(C)=O)=C2C1=O
DB05812	Abiraterone	approved	[H][C@@]12CC=C(C3=CC=CN=C3)[C@@]1(C)CC[C@@]1([H])[C@@]2([H])CC=C2C[C@@H](O)CC[C@]12C
DB05990	Obeticholic acid	approved	[H][C@@]1(CC[C@@]2([H])[C@]3([H])[C@H](O)[C@H](CC)[C@]4([H])C[C@H](O)CC[C@]4(C)[C@@]3([H])CC[C@]12C)[C@H](C)CCC(O)=O
DB06016	Cariprazine	approved	CN(C)C(=O)N[C@H]1CC[C@H](CCN2CCN(CC2)C2=C(Cl)C(Cl)=CC=C2)CC1
DB06077	Lumateperone	approved	[H][C@]12CCN(CCCC(=O)C3=CC=C(F)C=C3)C[C@@]1([H])C1=CC=CC3=C1N2CCN3C
DB06083	Tapinarof	approved	CC(C)C1=C(O)C=C(\C=C\C2=CC=CC=C2)C=C1O
DB06119	Cenobamate	approved	NC(=O)O[C@@H](CN1N=CN=N1)C1=C(Cl)C=CC=C1
DB06137	Tirbanibulin	approved	O=C(CC1=CC=C(C=N1)C1=CC=C(OCCN2CCOCC2)C=C1)NCC1=CC=CC=C1
DB06144	Sertindole	approved	FC1=CC=C(C=C1)N1C=C(C2CCN(CCN3CCNC3=O)CC2)C2=C1C=CC(Cl)=C2
DB06145	Spiramycin	approved	[H][C@@]1(CC[C@@H]([C@@H](C)O1)N(C)C)O[C@H]1\C=C\C=C\C[C@@H](C)OC(=O)C[C@@H](O)[C@H](OC)[C@@H](O[C@]2([H])O[C@H](C)[C@@H](O[C@@]3([H])C[C@@](C)(O)[C@@H](O)[C@H](C)O3)[C@@H]([C@H]2O)N(C)C)[C@@H](CC=O)C[C@H]1C
DB06147	Sulfathiazole	approved	NC1=CC=C(C=C1)S(=O)(=O)NC1=NC=CS1
DB06148	Mianserin	approved	CN1CCN2C(C1)C1=CC=CC=C1CC1=CC=CC=C21
DB06149	Teicoplanin	approved	CCCCCCCCCC(=O)N[C@@H]1[C@@H](O)[C@H](O)[C@@H](CO)O[C@H]1OC1=C2OC3=C(Cl)C=C(C=C3)[C@@H](O[C@@H]3O[C@H](CO)[C@@H](O)[C@H](O)[C@H]3NC(C)=O)[C@@H]3NC(=O)[C@H](NC(=O)[C@@H]4NC(=O)[C@H]5NC(=O)[C@@H](CC6=CC=C(OC1=CC4=C2)C(Cl)=C6)NC(=O)[C@H](N)C1=CC=C(O)C(OC2=CC(O)=CC5=C2)=C1)C1=CC=C(O)C(=C1)C1=C(C=C(O)C=C1OC1O[C@H](CO)[C@@H](O)[C@H](O)[C@@H]1O)[C@H](NC3=O)C(O)=O
DB06150	Sulfadimethoxine	approved	COC1=NC(OC)=NC(NS(=O)(=O)C2=CC=C(N)C=C2)=C1
DB06151	Acetylcysteine	approved	CC(=O)N[C@@H](CS)C(O)=O
DB06152	Nylidrin	approved	CC(CCC1=CC=CC=C1)NC(C)C(O)C1=CC=C(O)C=C1
DB06153	Pizotifen	approved	CN1CCC(CC1)=C1C2=C(CCC3=CC=CC=C13)SC=C2
DB06154	Pentaerythritol tetranitrate	approved	[O-][N+](=O)OCC(CO[N+]([O-])=O)(CO[N+]([O-])=O)CO[N+]([O-])=O
DB06155	Rimonabant	approved	CC1=C(N(N=C1C(=O)NN1CCCCC1)C1=C(Cl)C=C(Cl)C=C1)C1=CC=C(Cl)C=C1
DB06174	Noscapine	approved	[H][C@@]1(OC(=O)C2=C1C=CC(OC)=C2OC)[C@]1([H])N(C)CCC2=CC3=C(OCO3)C(OC)=C12
DB06176	Romidepsin	approved	C\C=C1/NC(=O)[C@H]2CSSCC\C=C\[C@H](CC(=O)N[C@H](C(C)C)C(=O)N2)OC(=O)[C@@H](NC1=O)C(C)C
DB06193	Pixantrone	approved	NCCNC1=CC=C(NCCN)C2=C1C(=O)C1=C(C=NC=C1)C2=O
DB06196	Icatibant	approved	[H][C@]12C[C@]([H])(N(C(=O)[C@@]3([H])CC4=C(CN3C(=O)[C@H](CO)NC(=O)[C@H](CC3=CC=CS3)NC(=O)CNC(=O)[C@]3([H])C[C@@H](O)CN3C(=O)[C@@H]3CCCN3C(=O)[C@H](CCCNC(N)=N)NC(=O)[C@H](N)CCCNC(N)=N)C=CC=C4)[C@@]1([H])CCCC2)C(=O)N[C@@H](CCCNC(N)=N)C(O)=O
DB06201	Rufinamide	approved	NC(=O)C1=CN(CC2=C(F)C=CC=C2F)N=N1
DB06202	Lasofoxifene	approved	[H][C@@]1(CCC2=CC(O)=CC=C2[C@@]1([H])C1=CC=C(OCCN2CCCC2)C=C1)C1=CC=CC=C1
DB06203	Alogliptin	approved	CN1C(=O)C=C(N2CCC[C@@H](N)C2)N(CC2=C(C=CC=C2)C#N)C1=O
DB06204	Tapentadol	approved	CC[C@H]([C@@H](C)CN(C)C)C1=CC(O)=CC=C1
DB06206	Sugammadex	approved	O[C@@H]1[C@@H](O)[C@@H]2O[C@H]3O[C@H](CSCCC(O)=O)[C@@H](O[C@H]4O[C@H](CSCCC(O)=O)[C@@H](O[C@H]5O[C@H](CSCCC(O)=O)[C@@H](O[C@H]6O[C@H](CSCCC(O)=O)[C@@H](O[C@H]7O[C@H](CSCCC(O)=O)[C@@H](O[C@H]8O[C@H](CSCCC(O)=O)[C@@H](O[C@H]9O[C@H](CSCCC(O)=O)[C@@H](O[C@H]1O[C@@H]2CSCCC(O)=O)[C@H](O)[C@H]9O)[C@H](O)[C@H]8O)[C@H](O)[C@H]7O)[C@H](O)[C@H]6O)[C@H](O)[C@H]5O)[C@H](O)[C@H]4O)[C@H](O)[C@H]3O
DB06207	Silodosin	approved	C[C@H](CC1=CC2=C(N(CCCO)CC2)C(=C1)C(N)=O)NCCOC1=CC=CC=C1OCC(F)(F)F
DB06209	Prasugrel	approved	CC(=O)OC1=CC2=C(CCN(C2)C(C(=O)C2CC2)C2=CC=CC=C2F)S1
DB06210	Eltrombopag	approved	CC1=NN(C(=O)\C1=N/NC1=CC=CC(C2=CC=CC(=C2)C(O)=O)=C1O)C1=CC=C(C)C(C)=C1
DB06211	Doripenem	approved	[H][C@]12[C@@H](C)C(S[C@@H]3CN[C@H](CNS(N)(=O)=O)C3)=C(N1C(=O)[C@]2([H])[C@@H](C)O)C(O)=O
DB06212	Tolvaptan	approved	CC1=CC=CC=C1C(=O)NC1=CC(C)=C(C=C1)C(=O)N1CCC[C@@H](O)C2=C1C=CC(Cl)=C2
DB06213	Regadenoson	approved	CNC(=O)C1=CN(N=C1)C1=NC2=C(N=CN2[C@@H]2O[C@H](CO)[C@@H](O)[C@H]2O)C(N)=N1
DB06215	Ferumoxytol	approved	[O--].[O--].[O--].[O--].[Fe++].[Fe+3].[Fe+3]
DB06216	Asenapine	approved	CN1CC2C(C1)C1=C(OC3=CC=C(Cl)C=C23)C=CC=C1
DB06217	Vernakalant	approved	COC1=C(OC)C=C(CCO[C@@H]2CCCC[C@H]2N2CC[C@@H](O)C2)C=C1
DB06218	Lacosamide	approved	COC[C@@H](NC(C)=O)C(=O)NCC1=CC=CC=C1
DB06228	Rivaroxaban	approved	ClC1=CC=C(S1)C(=O)NC[C@H]1CN(C(=O)O1)C1=CC=C(C=C1)N1CCOCC1=O
DB06230	Nalmefene	approved	OC1=CC=C2C[C@H]3N(CC4CC4)CC[C@@]45[C@@H](OC1=C24)C(=C)CC[C@@]35O
DB06234	Maribavir	approved	CC(C)NC1=NC2=CC(Cl)=C(Cl)C=C2N1[C@H]1O[C@@H](CO)[C@H](O)[C@@H]1O
DB06237	Avanafil	approved	COC1=C(Cl)C=C(CNC2=C(C=NC(=N2)N2CCC[C@H]2CO)C(=O)NCC2=NC=CC=N2)C=C1
DB06243	Eflornithine	approved	NCCCC(N)(C(F)F)C(O)=O
DB06249	Arzoxifene	approved	COC1=CC=C(C=C1)C1=C(OC2=CC=C(OCCN3CCCCC3)C=C2)C2=C(S1)C=C(O)C=C2
DB06261	Hexaminolevulinate	approved	[H]N([H])CC(=O)CCC(=O)OCCCCCC
DB06262	Droxidopa	approved	N[C@@H]([C@H](O)C1=CC(O)=C(O)C=C1)C(O)=O
DB06267	Udenafil	approved	CCCOC1=C(C=C(C=C1)S(=O)(=O)NCCC1CCCN1C)C1=NC(=O)C2=C(N1)C(CCC)=NN2C
DB06268	Sitaxentan	approved	CC1=NOC(NS(=O)(=O)C2=C(SC=C2)C(=O)CC2=CC3=C(OCO3)C=C2C)=C1Cl
DB06274	Alvimopan	approved	C[C@H]1CN(C[C@H](CC2=CC=CC=C2)C(=O)NCC(O)=O)CC[C@@]1(C)C1=CC(O)=CC=C1
DB06282	Levocetirizine	approved	OC(=O)COCCN1CCN(CC1)[C@H](C1=CC=CC=C1)C1=CC=C(Cl)C=C1
DB06283	Ziconotide	approved	[H][C@]12CSSC[C@]3([H])NC(=O)[C@H](CCCCN)NC(=O)[C@H](C)NC(=O)CNC(=O)[C@H](CCCCN)NC(=O)CNC(=O)[C@H](CCCCN)NC(=O)[C@@H](N)CSSC[C@]([H])(NC(=O)[C@]([H])(CSSC[C@H](NC(=O)[C@H](CCCCN)NC(=O)CNC(=O)[C@H](CO)NC(=O)[C@H](CCCNC(N)=N)NC1=O)C(N)=O)NC(=O)[C@H](CC(O)=O)NC(=O)[C@H](CC1=CC=C(O)C=C1)NC(=O)[C@H](CCSC)NC(=O)[C@H](CC(C)C)NC(=O)[C@H](CCCNC(N)=N)NC(=O)[C@H](CO)NC3=O)C(=O)N[C@@]([H])([C@@H](C)O)C(=O)NC…
DB06287	Temsirolimus	approved	OCC(C)(CO)C(=O)O[C@@H]1CC[C@@H](C[C@@H](C)[C@]2([H])CC(=O)[C@H](C)\C=C(C)\[C@@H](O)[C@@H](OC)C(=O)[C@H](C)C[C@H](C)\C=C\C=C\C=C(C)\[C@@H](OC)C[C@]3([H])CC[C@@H](C)[C@@](O)(O3)C(=O)C(=O)N3CCCC[C@H]3C(=O)O2)C[C@H]1OC
DB06288	Amisulpride	approved	CCN1CCCC1CNC(=O)C1=CC(=C(N)C=C1OC)S(=O)(=O)CC
DB06290	Simeprevir	approved	[H][C@]12C[C@]1(NC(=O)[C@]1([H])C[C@H](C[C@@]1([H])C(=O)N(C)CCCC\C=C/2)OC1=CC(=NC2=C1C=CC(OC)=C2C)C1=NC(=CS1)C(C)C)C(=O)NS(=O)(=O)C1CC1
DB06292	Dapagliflozin	approved	CCOC1=CC=C(CC2=C(Cl)C=CC(=C2)[C@@H]2O[C@H](CO)[C@@H](O)[C@H](O)[C@H]2O)C=C1
DB06335	Saxagliptin	approved	[H][C@@]12C[C@]1([H])N([C@@H](C2)C#N)C(=O)[C@@H](N)C12CC3CC(CC(O)(C3)C1)C2
DB06401	Bazedoxifene	approved	CC1=C(N(CC2=CC=C(OCCN3CCCCCC3)C=C2)C2=C1C=C(O)C=C2)C1=CC=C(O)C=C1
DB06402	Telavancin	approved	CCCCCCCCCCNCCN[C@@]1(C)C[C@H](O[C@@H]2[C@@H](O)[C@H](O)[C@@H](CO)O[C@H]2OC2=C3OC4=CC=C(C=C4Cl)[C@@H](O)[C@@H](NC(=O)[C@@H](CC(C)C)NC)C(=O)N[C@@H](CC(N)=O)C(=O)N[C@@H]4C(C=C2OC2=C(Cl)C=C(C=C2)[C@@H](O)[C@@H]2NC(=O)[C@H](NC4=O)C4=CC(=C(O)C=C4)C4=C(O)C(CNCP(O)(O)=O)=C(O)C=C4[C@H](NC2=O)C(O)=O)=C3)O[C@@H](C)[C@H]1O
DB06403	Ambrisentan	approved	COC([C@H](OC1=NC(C)=CC(C)=N1)C(O)=O)(C1=CC=CC=C1)C1=CC=CC=C1
DB06410	Doxercalciferol	approved	[H][C@@]1(CC[C@@]2([H])\C(CCC[C@]12C)=C\C=C1\C[C@@H](O)C[C@H](O)C1=C)[C@H](C)\C=C\[C@H](C)C(C)C
DB06412	Oxymetholone	approved	[H][C@@]12CC[C@](C)(O)[C@@]1(C)CC[C@@]1([H])[C@@]2([H])CC[C@@]2([H])CC(=O)\C(C[C@]12C)=C/O
DB06413	Armodafinil	approved	NC(=O)C[S@@](=O)C(C1=CC=CC=C1)C1=CC=CC=C1
DB06414	Etravirine	approved	CC1=CC(=CC(C)=C1OC1=C(Br)C(N)=NC(NC2=CC=C(C=C2)C#N)=N1)C#N
DB06441	Cangrelor	approved	CSCCNC1=C2N=CN([C@@H]3O[C@H](COP(O)(=O)OP(O)(=O)C(Cl)(Cl)P(O)(O)=O)[C@@H](O)[C@H]3O)C2=NC(SCCC(F)(F)F)=N1
DB06448	Lonafarnib	approved	NC(=O)N1CCC(CC(=O)N2CCC(CC2)[C@H]2C3=C(CCC4=C2C(Br)=CC(Cl)=C4)C=C(Br)C=N3)CC1
DB06480	Prucalopride	approved	COCCCN1CCC(CC1)NC(=O)C1=C2OCCC2=C(N)C(Cl)=C1
DB06589	Pazopanib	approved	CN(C1=CC2=NN(C)C(C)=C2C=C1)C1=CC=NC(NC2=CC=C(C)C(=C2)S(N)(=O)=O)=N1
DB06590	Ceftaroline fosamil	approved	[H][C@]12SCC(SC3=NC(=CS3)C3=CC=[N+](C)C=C3)=C(N1C(=O)[C@H]2NC(=O)C(=N/OCC)\C1=NSC(NP(O)(O)=O)=N1)C([O-])=O
DB06594	Agomelatine	approved	COC1=CC2=C(CCNC(C)=O)C=CC=C2C=C1
DB06595	Midostaurin	approved	CO[C@@H]1[C@@H](C[C@H]2O[C@]1(C)N1C3=C(C=CC=C3)C3=C1C1=C(C4=C(C=CC=C4)N21)C1=C3CNC1=O)N(C)C(=O)C1=CC=CC=C1
DB06603	Panobinostat	approved	CC1=C(CCNCC2=CC=C(\C=C\C(=O)NO)C=C2)C2=CC=CC=C2N1
DB06605	Apixaban	approved	COC1=CC=C(C=C1)N1N=C(C(N)=O)C2=C1C(=O)N(CC2)C1=CC=C(C=C1)N1CCCCC1=O
DB06608	Tafenoquine	approved	COC1=CC(C)=C2C(OC3=CC=CC(=C3)C(F)(F)F)=C(OC)C=C(NC(C)CCCN)C2=N1
DB06614	Peramivir	approved	[H][C@@]1([C@@H](NC(C)=O)C(CC)CC)[C@H](O)[C@H](C[C@H]1NC(N)=N)C(O)=O
DB06616	Bosutinib	approved	COC1=CC(NC2=C(C=NC3=CC(OCCCN4CCN(C)CC4)=C(OC)C=C23)C#N)=C(Cl)C=C1Cl
DB06626	Axitinib	approved	CNC(=O)C1=C(SC2=CC=C3C(NN=C3\C=C\C3=CC=CC=N3)=C2)C=CC=C1
DB06636	Isavuconazonium	approved	[H]C(C)(OC(=O)N(C)C1=C(COC(=O)CNC)C=CC=N1)[N+]1=CN(C[C@](O)(C2=C(F)C=CC(F)=C2)[C@@]([H])(C)C2=NC(=CS2)C2=CC=C(C=C2)C#N)N=C1
DB06637	Dalfampridine	approved	NC1=CC=NC=C1
DB06654	Safinamide	approved	C[C@H](NCC1=CC=C(OCC2=CC(F)=CC=C2)C=C1)C(N)=O
DB06663	Pasireotide	approved	NCCCC[C@@H]1NC(=O)[C@@H](CC2=CNC3=C2C=CC=C3)NC(=O)[C@@H](NC(=O)[C@@H]2C[C@H](CN2C(=O)[C@H](CC2=CC=CC=C2)NC(=O)[C@H](CC2=CC=C(OCC3=CC=CC=C3)C=C2)NC1=O)OC(=O)NCCN)C1=CC=CC=C1
DB06684	Vilazodone	approved	NC(=O)C1=CC2=CC(=CC=C2O1)N1CCN(CCCCC2=CNC3=C2C=C(C=C3)C#N)CC1
DB06689	Ethanolamine oleate	approved	NCCO.CCCCCCCC\C=C/CCCCCCCC(O)=O
DB06690	Nitrous oxide	approved	[N-]=[N+]=O
DB06691	Mepyramine	approved	COC1=CC=C(CN(CCN(C)C)C2=NC=CC=C2)C=C1
DB06694	Xylometazoline	approved	CC1=CC(=CC(C)=C1CC1=NCCN1)C(C)(C)C
DB06695	Dabigatran etexilate	approved	CCCCCCOC(=O)\N=C(\N)C1=CC=C(NCC2=NC3=C(C=CC(=C3)C(=O)N(CCC(=O)OCC)C3=NC=CC=C3)N2C)C=C1
DB06697	Artemether	approved	[H][C@@]12CC[C@@H](C)[C@]3([H])CC[C@@]4(C)OO[C@@]13[C@]([H])(O[C@H](OC)[C@@H]2C)O4
DB06698	Betahistine	approved	CNCCC1=CC=CC=N1
DB06699	Degarelix	approved	CC(C)C[C@H](NC(=O)[C@@H](CC1=CC=C(NC(N)=O)C=C1)NC(=O)[C@H](CC1=CC=C(NC(=O)[C@@H]2CC(=O)NC(=O)N2)C=C1)NC(=O)[C@H](CO)NC(=O)[C@@H](CC1=CC=CN=C1)NC(=O)[C@@H](CC1=CC=C(Cl)C=C1)NC(=O)[C@@H](CC1=CC=C2C=CC=CC2=C1)NC(C)=O)C(=O)N[C@@H](CCCCNC(C)C)C(=O)N1CCC[C@H]1C(=O)N[C@H](C)C(N)=O
DB06700	Desvenlafaxine	approved	CN(C)CC(C1=CC=C(O)C=C1)C1(O)CCCCC1
DB06701	Dexmethylphenidate	approved	[H][C@@](C(=O)OC)(C1=CC=CC=C1)[C@@]1([H])CCCCN1
DB06702	Fesoterodine	approved	CC(C)N(CC[C@H](C1=CC=CC=C1)C1=C(OC(=O)C(C)C)C=CC(CO)=C1)C(C)C
DB06703	Gadobutrol	approved	OC[C@H](O)[C@H](CO)[N+]12CC[N+]3(CC([O-])=O)CC[N+]4(CC([O-])=O)CC[N+](CC([O-])=O)(CC1)[Gd-]234
DB06704	Iobenguane	approved	NC(N)=NCC1=CC(I)=CC=C1
DB06705	Gadofosveset trisodium	approved	[Na+].[Na+].[Na+].[Gd+3].[O-]C(=O)CN(CCN(CC([O-])=O)CC([O-])=O)C[C@H](COP([O-])(=O)OC1CCC(CC1)(C1=CC=CC=C1)C1=CC=CC=C1)N(CC([O-])=O)CC([O-])=O
DB06706	Isometheptene	approved	CNC(C)CCC=C(C)C
DB06707	Levonordefrin	approved	C[C@H](N)[C@H](O)C1=CC(O)=C(O)C=C1
DB06708	Lumefantrine	approved	CCCCN(CCCC)CC(O)C1=C2C(=CC(Cl)=C1)\C(=C/C1=CC=C(Cl)C=C1)C1=C2C=CC(Cl)=C1
DB06709	Methacholine	approved	CC(C[N+](C)(C)C)OC(C)=O
DB06710	Methyltestosterone	approved	[H][C@@]12CC[C@](C)(O)[C@@]1(C)CC[C@@]1([H])[C@@]2([H])CCC2=CC(=O)CC[C@]12C
DB06711	Naphazoline	approved	C(C1=NCCN1)C1=CC=CC2=CC=CC=C12
DB06712	Nilvadipine	approved	COC(=O)C1=C(NC(C)=C(C1C1=CC(=CC=C1)[N+]([O-])=O)C(=O)OC(C)C)C#N
DB06713	Norelgestromin	approved	[H][C@@]12CC[C@@](O)(C#C)[C@@]1(CC)CC[C@]1([H])[C@@]3([H])CCC(C=C3CC[C@@]21[H])=NO
DB06714	Propylhexedrine	approved	CNC(C)CC1CCCCC1
DB06715	Potassium Iodide	approved	[K+].[I-]
DB06716	Fospropofol	approved	CC(C)C1=CC=CC(C(C)C)=C1OCOP(O)(O)=O
DB06717	Fosaprepitant	approved	C[C@@H](O[C@H]1OCCN(CC2=NC(=O)N(N2)P(O)(O)=O)[C@H]1C1=CC=C(F)C=C1)C1=CC(=CC(=C1)C(F)(F)F)C(F)(F)F
DB06718	Stanozolol	approved	[H][C@@]12CC[C@](C)(O)[C@@]1(C)CC[C@@]1([H])[C@@]2([H])CC[C@@]2([H])CC3=NNC=C3C[C@]12C
DB06719	Buserelin	approved	CCNC(=O)[C@@H]1CCCN1C(=O)[C@H](CCCNC(N)=N)NC(=O)[C@H](CC(C)C)NC(=O)[C@@H](COC(C)(C)C)NC(=O)[C@H](CC1=CC=C(O)C=C1)NC(=O)[C@H](CO)NC(=O)[C@H](CC1=CNC2=C1C=CC=C2)NC(=O)[C@H](CC1=CN=CN1)NC(=O)[C@@H]1CCC(=O)N1
DB06723	Aluminum hydroxide	approved	[OH-].[OH-].[OH-].[Al+3]
DB06724	Calcium carbonate	approved	[Ca++].[O-]C([O-])=O
DB06725	Lornoxicam	approved	CN1C(C(=O)NC2=CC=CC=N2)=C(O)C2=C(C=C(Cl)S2)S1(=O)=O
DB06729	Sulfaphenazole	approved	NC1=CC=C(C=C1)S(=O)(=O)NC1=CC=NN1C1=CC=CC=C1
DB06736	Aceclofenac	approved	OC(=O)COC(=O)CC1=CC=CC=C1NC1=C(Cl)C=CC=C1Cl
DB06742	Ambroxol	approved	NC1=C(Br)C=C(Br)C=C1CN[C@H]1CC[C@H](O)CC1
DB06751	Drotaverine	approved	CCOC1=C(OCC)C=C(\C=C2/NCCC3=CC(OCC)=C(OCC)C=C23)C=C1
DB06753	Triclofos	approved	OP(O)(=O)OCC(Cl)(Cl)Cl
DB06755	Beta carotene	approved	C\C(\C=C\C=C(/C)\C=C\C1=C(C)CCCC1(C)C)=C/C=C/C=C(\C)/C=C/C=C(\C)/C=C/C1=C(C)CCCC1(C)C
DB06756	Betaine	approved	C[N+](C)(C)CC([O-])=O
DB06757	Manganese	approved	[Mn++]
DB06762	Pinacidil	approved	CC(N\C(NC#N)=N\C1=CC=NC=C1)C(C)(C)C
DB06764	Tetryzoline	approved	C1CN=C(N1)C1CCCC2=CC=CC=C12
DB06766	Alcaftadine	approved	CN1CCC(CC1)=C1C2=NC=C(C=O)N2CCC2=CC=CC=C12
DB06767	Ammonium chloride	approved	[NH4+].[Cl-]
DB06768	Ammonium lactate	approved	[NH4+].CC(O)C([O-])=O
DB06769	Bendamustine	approved	CN1C(CCCC(O)=O)=NC2=CC(=CC=C12)N(CCCl)CCCl
DB06770	Benzyl alcohol	approved	OCC1=CC=CC=C1
DB06771	Besifloxacin	approved	N[C@@H]1CCCCN(C1)C1=C(F)C=C2C(=O)C(=CN(C3CC3)C2=C1Cl)C(O)=O
DB06772	Cabazitaxel	approved	[H][C@]12[C@H](OC(=O)C3=CC=CC=C3)[C@]3(O)C[C@H](OC(=O)[C@H](O)[C@@H](NC(=O)OC(C)(C)C)C4=CC=CC=C4)C(C)=C([C@@H](OC)C(=O)[C@]1(C)[C@H](C[C@H]1OC[C@@]21OC(C)=O)OC)C3(C)C
DB06774	Capsaicin	approved	COC1=C(O)C=CC(CNC(=O)CCCC\C=C\C(C)C)=C1
DB06775	Carglumic acid	approved	NC(=O)N[C@@H](CCC(O)=O)C(O)=O
DB06777	Chenodeoxycholic acid	approved	[H][C@@]1(CC[C@@]2([H])[C@]3([H])[C@H](O)C[C@]4([H])C[C@H](O)CC[C@]4(C)[C@@]3([H])CC[C@]12C)[C@H](C)CCC(O)=O
DB06778	Cupric sulfate	approved	[Cu++].[O-]S([O-])(=O)=O
DB06780	Desoxycorticosterone acetate	approved	[H][C@@]12CC[C@H](C(=O)COC(C)=O)[C@@]1(C)CC[C@@]1([H])[C@@]2([H])CCC2=CC(=O)CC[C@]12C
DB06781	Difluprednate	approved	[H][C@@]12CC[C@](OC(=O)CCC)(C(=O)COC(C)=O)[C@@]1(C)C[C@H](O)[C@@]1(F)[C@@]2([H])C[C@H](F)C2=CC(=O)C=C[C@]12C
DB06782	Dimercaprol	approved	OCC(S)CS
DB06783	Prussian blue	approved	[Fe+3].[Fe+3].[Fe+3].[Fe+3].N#C[Fe-4](C#N)(C#N)(C#N)(C#N)C#N.N#C[Fe-4](C#N)(C#N)(C#N)(C#N)C#N.N#C[Fe-4](C#N)(C#N)(C#N)(C#N)C#N
DB06784	Gallium citrate Ga-67	approved	[67Ga+3].OC(CC([O-])=O)(CC([O-])=O)C([O-])=O
DB06785	Ganirelix	approved	CCNC(NCC)=NCCCC[C@@H](NC(=O)[C@H](CC1=CC=C(O)C=C1)NC(=O)[C@H](CO)NC(=O)[C@@H](CC1=CC=CN=C1)NC(=O)[C@@H](CC1=CC=C(Cl)C=C1)NC(=O)[C@@H](CC1=CC2=CC=CC=C2C=C1)NC(C)=O)C(=O)N[C@@H](CC(C)C)C(=O)N[C@@H](CCCCN=C(NCC)NCC)C(=O)N1CCC[C@H]1C(=O)N[C@H](C)C(N)=O
DB06786	Halcinonide	approved	[H][C@@]12C[C@H]3OC(C)(C)O[C@@]3(C(=O)CCl)[C@@]1(C)C[C@H](O)[C@@]1(F)[C@@]2([H])CCC2=CC(=O)CC[C@]12C
DB06787	Hexocyclium	approved	C[N+]1(C)CCN(CC(O)(C2CCCCC2)C2=CC=CC=C2)CC1
DB06788	Histrelin	approved	CC(O)=O.CC(O)=O.CCNC(=O)[C@@H]1CCCN1C(=O)[C@H](CCCNC(N)=N)NC(=O)[C@H](CC(C)C)NC(=O)[C@@H](CC1=CN(CC2=CC=CC=C2)C=N1)NC(=O)[C@H](CC1=CC=C(O)C=C1)NC(=O)[C@H](CO)NC(=O)[C@H](CC1=CNC2=C1C=CC=C2)NC(=O)[C@H](CC1=CNC=N1)NC(=O)[C@@H]1CCC(=O)N1
DB06789	Hydroxyprogesterone caproate	approved	[H][C@@]12CC[C@](OC(=O)CCCCC)(C(C)=O)[C@@]1(C)CC[C@@]1([H])[C@@]2([H])CCC2=CC(=O)CC[C@]12C
DB06791	Lanreotide	approved	[H]N([H])CCCCC1N([H])C(=O)C(CC2=CN([H])C3=CC=CC=C23)N([H])C(=O)C(CC2=CC=C(O)C=C2)N([H])C(=O)C(CSSCC(N([H])C(=O)C(N([H])C1=O)C(C)C)C(=O)N([H])C(C(C)O)C(=O)N([H])[H])N([H])C(=O)C(CC1=CC2=CC=CC=C2C=C1)N([H])[H]
DB06792	Lanthanum carbonate	approved	[La+3].[La+3].[O-]C([O-])=O.[O-]C([O-])=O.[O-]C([O-])=O
DB06794	Lodoxamide	approved	OC(=O)C(=O)NC1=CC(=CC(NC(=O)C(O)=O)=C1Cl)C#N
DB06795	Mafenide	approved	NCC1=CC=C(C=C1)S(N)(=O)=O
DB06796	Mangafodipir	approved	[Mn++].CC1=C(O)C(CN(CCN(CC([O-])=O)CC2=CC(COP(O)(O)=O)=NC(C)=C2O)CC([O-])=O)=CC(COP(O)(O)=O)=N1
DB06797	Mebutamate	approved	CCC(C)C(C)(COC(N)=O)COC(N)=O
DB06799	Methenamine	approved	C1N2CN3CN1CN(C2)C3
DB06800	Methylnaltrexone	approved	C[N@+]1(CC2CC2)CC[C@]23[C@H]4OC5=C(O)C=CC(C[C@@H]1[C@]2(O)CCC4=O)=C35
DB06802	Nepafenac	approved	NC(=O)CC1=CC=CC(C(=O)C2=CC=CC=C2)=C1N
DB06803	Niclosamide	approved	OC1=C(C=C(Cl)C=C1)C(=O)NC1=C(Cl)C=C(C=C1)[N+]([O-])=O
DB06804	Nonoxynol-9	approved	CCCCCCCCCC1=CC=C(OCCOCCOCCOCCOCCOCCOCCOCCOCCO)C=C1
DB06807	Phenyl aminosalicylate	approved	NC1=CC(O)=C(C=C1)C(=O)OC1=CC=CC=C1
DB06809	Plerixafor	approved	C(N1CCCNCCNCCCNCC1)C1=CC=C(CN2CCCNCCNCCCNCC2)C=C1
DB06810	Plicamycin	approved	CO[C@@H]([C@@H]1CC2=CC3=CC(O[C@H]4C[C@@H](O[C@H]5C[C@@H](O)[C@H](O)[C@@H](C)O5)[C@H](O)[C@@H](C)O4)=C(C)C(O)=C3C(O)=C2C(=O)[C@H]1O[C@H]1C[C@@H](O[C@H]2C[C@@H](O[C@H]3C[C@](C)(O)[C@H](O)[C@@H](C)O3)[C@@H](O)[C@@H](C)O2)[C@H](O)[C@@H](C)O1)C(=O)[C@@H](O)[C@@H](C)O
DB06811	Polidocanol	approved	CCCCCCCCCCCCOCCOCCOCCOCCOCCOCCOCCOCCOCCO
DB06813	Pralatrexate	approved	NC1=NC2=NC=C(CC(CC#C)C3=CC=C(C=C3)C(=O)N[C@@H](CCC(O)=O)C(O)=O)N=C2C(N)=N1
DB06814	Protokylol	approved	CC(CC1=CC=C2OCOC2=C1)NCC(O)C1=CC=C(O)C(O)=C1
DB06815	Pyrithione	approved	[O-][N+]1=C(S)C=CC=C1
DB06816	Pyrvinium	approved	CN(C)C1=CC2=C(C=C1)[N+](C)=C(\C=C\C1=C(C)N(C(C)=C1)C1=CC=CC=C1)C=C2
DB06817	Raltegravir	approved	CN1C(=O)C(O)=C(N=C1C(C)(C)NC(=O)C1=NN=C(C)O1)C(=O)NCC1=CC=C(F)C=C1
DB06819	Phenylbutyric acid	approved	OC(=O)CCCC1=CC=CC=C1
DB06820	Sulconazole	approved	ClC1=CC=C(CSC(CN2C=CN=C2)C2=C(Cl)C=C(Cl)C=C2)C=C1
DB06821	Sulfameter	approved	COC1=CN=C(NS(=O)(=O)C2=CC=C(N)C=C2)N=C1
DB06823	Tiopronin	approved	CC(S)C(=O)NCC(O)=O
DB06824	Triethylenetetramine	approved	NCCNCCNCCN
DB06825	Triptorelin	approved	CC(C)C[C@H](NC(=O)[C@@H](CC1=CNC2=CC=CC=C12)NC(=O)[C@H](CC1=CC=C(O)C=C1)NC(=O)[C@H](CO)NC(=O)[C@H](CC1=CNC2=C1C=CC=C2)NC(=O)[C@H](CC1=CNC=N1)NC(=O)[C@@H]1CCC(=O)N1)C(=O)N[C@@H](CCCNC(N)=N)C(=O)N1CCC[C@H]1C(=O)NCC(N)=O
DB06826	Unoprostone	approved	CCCCCCCC(=O)CC[C@H]1[C@H](O)C[C@H](O)[C@@H]1C\C=C/CCCC(O)=O
DB06827	Viomycin	approved	[H][C@@]1(C[C@H](O)NC(=N)N1)[C@]1([H])NC(=O)\C(NC(=O)[C@H](CO)NC(=O)[C@H](CO)NC(=O)[C@H](CNC1=O)NC(=O)C[C@@H](N)CCCN)=C\NC(N)=O
DB07565	Chloramphenicol succinate	approved	O[C@@H]([C@@H](COC(=O)CCC(O)=O)NC(=O)C(Cl)Cl)C1=CC=C(C=C1)[N+]([O-])=O
DB07776	Flavone	approved	O=C1C=C(OC2=CC=CC=C12)C1=CC=CC=C1
DB08329	Sulthiame	approved	NS(=O)(=O)C1=CC=C(C=C1)N1CCCCS1(=O)=O
DB08439	Parecoxib	approved	CCC(=O)NS(=O)(=O)C1=CC=C(C=C1)C1=C(C)ON=C1C1=CC=CC=C1
DB08604	Triclosan	approved	OC1=CC(Cl)=CC=C1OC1=C(Cl)C=C(Cl)C=C1
DB08797	Salicylamide	approved	NC(=O)C1=CC=CC=C1O
DB08799	Antazoline	approved	C(N(CC1=CC=CC=C1)C1=CC=CC=C1)C1=NCCN1
DB08801	Dimetindene	approved	CC(C1=C(CCN(C)C)CC2=CC=CC=C12)C1=CC=CC=N1
DB08804	Nandrolone decanoate	approved	[H][C@@]12CC[C@H](OC(=O)CCCCCCCCC)[C@@]1(C)CC[C@]1([H])[C@@]3([H])CCC(=O)C=C3CC[C@@]21[H]
DB08809	Dichloroacetic acid	approved	OC(=O)C(Cl)Cl
DB08814	Triflusal	approved	CC(=O)OC1=C(C=CC(=C1)C(F)(F)F)C(O)=O
DB08815	Lurasidone	approved	[H][C@@]12[C@H]3CC[C@H](C3)[C@]1([H])C(=O)N(C[C@@H]1CCCC[C@H]1CN1CCN(CC1)C1=NSC3=CC=CC=C13)C2=O
DB08816	Ticagrelor	approved	CCCSC1=NC2=C(N=NN2[C@@H]2C[C@H](OCCO)[C@@H](O)[C@H]2O)C(N[C@@H]2C[C@H]2C2=CC(F)=C(F)C=C2)=N1
DB08818	Hyaluronic acid	approved	CC(=O)N[C@H]1[C@H](O)O[C@H](CO)[C@@H](O)C1O[C@@H]1O[C@@H]([C@@H](O[C@@H]2O[C@H](CO)[C@@H](O)C(O[C@@H]3O[C@@H]([C@@H](O)[C@H](O)[C@H]3O)C(O)=O)[C@H]2NC(C)=O)[C@H](O)[C@H]1O)C(O)=O
DB08819	Tafluprost	approved	CC(C)OC(=O)CCC\C=C/C[C@H]1[C@@H](O)C[C@@H](O)[C@@H]1\C=C\C(F)(F)COC1=CC=CC=C1
DB08820	Ivacaftor	approved	CC(C)(C)C1=CC(=C(O)C=C1NC(=O)C1=CNC2=CC=CC=C2C1=O)C(C)(C)C
DB08822	Azilsartan medoxomil	approved	CCOC1=NC2=C(N1CC1=CC=C(C=C1)C1=CC=CC=C1C1=NOC(=O)N1)C(=CC=C2)C(=O)OCC1=C(C)OC(=O)O1
DB08823	Spinosad	approved	[H][C@]1(C[C@@]2([H])C=C[C@@]3([H])[C@]4([H])CC(=O)O[C@@]([H])(CC)CCC[C@]([H])(O[C@@]5([H])CC[C@]([H])(N(C)C)[C@@]([H])(C)O5)[C@@]([H])(C)C(=O)C4=C[C@@]3([H])[C@]2([H])C1)O[C@]1([H])O[C@@]([H])(C)[C@]([H])(OC)[C@@]([H])(OC)[C@@]1([H])OC.[H][C@]1(C[C@@]2([H])C(C)=C[C@@]3([H])[C@]4([H])CC(=O)O[C@@]([H])(CC)CCC[C@]([H])(O[C@@]5([H])CC[C@]([H])(N(C)C)[C@@]([H])(C)O5)[C@@]([H])(C)C(=O)C4=C[C@@]3([H])[…
DB08824	Ioflupane I-123	approved	[H][C@]12CC[C@]([H])([C@H]([C@H](C1)C1=CC=C([123I])C=C1)C(=O)OC)N2CCCF
DB08826	Deferiprone	approved	CN1C=CC(=O)C(O)=C1C
DB08827	Lomitapide	approved	FC(F)(F)CNC(=O)C1(CCCCN2CCC(CC2)NC(=O)C2=C(C=CC=C2)C2=CC=C(C=C2)C(F)(F)F)C2=CC=CC=C2C2=CC=CC=C12
DB08828	Vismodegib	approved	CS(=O)(=O)C1=CC(Cl)=C(C=C1)C(=O)NC1=CC=C(Cl)C(=C1)C1=CC=CC=N1
DB08834	Tauroursodeoxycholic acid	approved	[H][C@@]12CC[C@H]([C@H](C)CCC(=O)NCCS(O)(=O)=O)[C@@]1(C)CC[C@@]1([H])[C@@]2([H])[C@@H](O)C[C@]2([H])C[C@H](O)CC[C@]12C
DB08842	Acetylcarnitine	approved	CC(=O)O[C@H](CC([O-])=O)C[N+](C)(C)C
DB08860	Pitavastatin	approved	O[C@H](C[C@H](O)\C=C\C1=C(N=C2C=CC=CC2=C1C1=CC=C(F)C=C1)C1CC1)CC(O)=O
DB08864	Rilpivirine	approved	CC1=CC(\C=C\C#N)=CC(C)=C1NC1=CC=NC(NC2=CC=C(C=C2)C#N)=N1
DB08865	Crizotinib	approved	C[C@@H](OC1=CC(=CN=C1N)C1=CN(N=C1)C1CCNCC1)C1=C(Cl)C=CC(F)=C1Cl
DB08867	Ulipristal	approved	CN(C)C1=CC=C(C=C1)[C@H]1C[C@@]2(C)[C@@H](CC[C@]2(O)C(C)=O)[C@@H]2CCC3=CC(=O)CCC3=C12
DB08868	Fingolimod	approved	CCCCCCCCC1=CC=C(CCC(N)(CO)CO)C=C1
DB08871	Eribulin	approved	[H][C@@]12CC(=C)[C@]([H])(CC[C@@]3([H])C[C@@H](C)C(=C)[C@@]([H])(C[C@]4([H])O[C@H](C[C@H](O)CN)[C@H](OC)[C@@]4([H])CC(=O)C[C@@]4([H])CC[C@]5([H])O[C@@]6([H])[C@H]7O[C@@]8(C[C@]7([H])O[C@@]6([H])[C@@]([H])(O8)[C@@]5([H])O4)CC1)O3)O2
DB08872	Gabapentin enacarbil	approved	CC(C)C(=O)OC(C)OC(=O)NCC1(CC(O)=O)CCCCC1
DB08873	Boceprevir	approved	[H][C@]12CN([C@H](C(=O)NC(CC3CCC3)C(=O)C(N)=O)[C@@]1([H])C2(C)C)C(=O)[C@@H](NC(=O)NC(C)(C)C)C(C)(C)C
DB08874	Fidaxomicin	approved	[H][C@@]1(O[C@@H]2[C@@H](CC)\C=C(C)\[C@@H](O)C\C=C\C=C(CO[C@@H]3O[C@H](C)[C@@H](OC(=O)C4=C(CC)C(Cl)=C(O)C(Cl)=C4O)[C@H](O)[C@@H]3OC)\C(=O)O[C@@H](C\C=C(/C)\C=C2/C)[C@@H](C)O)OC(C)(C)[C@@H](OC(=O)C(C)C)[C@H](O)[C@@H]1O
DB08875	Cabozantinib	approved	COC1=CC2=C(C=C1OC)C(OC1=CC=C(NC(=O)C3(CC3)C(=O)NC3=CC=C(F)C=C3)C=C1)=CC=N2
DB08877	Ruxolitinib	approved	N#CC[C@H](C1CCCC1)N1C=C(C=N1)C1=C2C=CNC2=NC=N1
DB08880	Teriflunomide	approved	C\C(O)=C(/C#N)C(=O)NC1=CC=C(C=C1)C(F)(F)F
DB08881	Vemurafenib	approved	CCCS(=O)(=O)NC1=C(F)C(C(=O)C2=CNC3=NC=C(C=C23)C2=CC=C(Cl)C=C2)=C(F)C=C1
DB08882	Linagliptin	approved	CC#CCN1C(=NC2=C1C(=O)N(CC1=NC3=C(C=CC=C3)C(C)=N1)C(=O)N2C)N1CCC[C@@H](N)C1
DB08883	Perampanel	approved	O=C1N(C=C(C=C1C1=CC=CC=C1C#N)C1=NC=CC=C1)C1=CC=CC=C1
DB08884	Gadoxetic acid	approved	[Gd+3].[H][C@@](CN(CCN(CC([O-])=O)CC([O-])=O)CC([O-])=O)(CC1=CC=C(OCC)C=C1)N(CC(O)=O)CC(O)=O
DB08887	Icosapent ethyl	approved	CCOC(=O)CCC\C=C/C\C=C/C\C=C/C\C=C/C\C=C/CC
DB08889	Carfilzomib	approved	CC(C)C[C@H](NC(=O)[C@H](CCC1=CC=CC=C1)NC(=O)CN1CCOCC1)C(=O)N[C@@H](CC1=CC=CC=C1)C(=O)N[C@@H](CC(C)C)C(=O)[C@@]1(C)CO1
DB08890	Linaclotide	approved	[H][C@]1(CSSC[C@]2([H])NC(=O)[C@H](CC3=CC=C(O)C=C3)NC(=O)[C@H](CCC(O)=O)NC(=O)[C@@H]3CSSC[C@H](NC(=O)[C@H](C)NC(=O)[C@@H]4CCCN4C(=O)[C@H](CC(N)=O)NC(=O)[C@H](CSSC[C@H](N)C(=O)N3)NC2=O)C(=O)N[C@@]([H])([C@@H](C)O)C(=O)NCC(=O)N1)C(=O)N[C@@H](CC1=CC=C(O)C=C1)C(O)=O
DB08893	Mirabegron	approved	NC1=NC(CC(=O)NC2=CC=C(CCNC[C@H](O)C3=CC=CC=C3)C=C2)=CS1
DB08895	Tofacitinib	approved	C[C@@H]1CCN(C[C@@H]1N(C)C1=NC=NC2=C1C=CN2)C(=O)CC#N
DB08896	Regorafenib	approved	CNC(=O)C1=CC(OC2=CC(F)=C(NC(=O)NC3=CC=C(Cl)C(=C3)C(F)(F)F)C=C2)=CC=N1
DB08897	Aclidinium	approved	OC(C(=O)O[C@H]1C[N+]2(CCCOC3=CC=CC=C3)CCC1CC2)(C1=CC=CS1)C1=CC=CS1
DB08899	Enzalutamide	approved	CNC(=O)C1=C(F)C=C(C=C1)N1C(=S)N(C(=O)C1(C)C)C1=CC=C(C#N)C(=C1)C(F)(F)F
DB08901	Ponatinib	approved	CN1CCN(CC2=CC=C(NC(=O)C3=CC(C#CC4=CN=C5C=CC=NN45)=C(C)C=C3)C=C2C(F)(F)F)CC1
DB08903	Bedaquiline	approved	COC1=NC2=C(C=C(Br)C=C2)C=C1[C@@H](C1=CC=CC=C1)[C@@](O)(CCN(C)C)C1=CC=CC2=C1C=CC=C2
DB08905	Formestane	approved	[H][C@@]12CCC(=O)[C@@]1(C)CC[C@@]1([H])[C@@]2([H])CCC2=C(O)C(=O)CC[C@]12C
DB08906	Fluticasone furoate	approved	[H][C@@]12C[C@@H](C)[C@](OC(=O)C3=CC=CO3)(C(=O)SCF)[C@@]1(C)C[C@H](O)[C@@]1(F)[C@@]2([H])C[C@H](F)C2=CC(=O)C=C[C@]12C
DB08907	Canagliflozin	approved	[H][C@]1(O[C@H](CO)[C@@H](O)[C@H](O)[C@H]1O)C1=CC=C(C)C(CC2=CC=C(S2)C2=CC=C(F)C=C2)=C1
DB08908	Dimethyl fumarate	approved	[H]\C(=C(\[H])C(=O)OC)C(=O)OC
DB08909	Glycerol phenylbutyrate	approved	O=C(CCCC1=CC=CC=C1)OCC(COC(=O)CCCC1=CC=CC=C1)OC(=O)CCCC1=CC=CC=C1
DB08910	Pomalidomide	approved	NC1=CC=CC2=C1C(=O)N(C1CCC(=O)NC1=O)C2=O
DB08911	Trametinib	approved	CN1C(=O)C(C)=C2N(C(=O)N(C3CC3)C(=O)C2=C1NC1=CC=C(I)C=C1F)C1=CC(NC(C)=O)=CC=C1
DB08912	Dabrafenib	approved	CC(C)(C)C1=NC(=C(S1)C1=NC(N)=NC=C1)C1=C(F)C(NS(=O)(=O)C2=C(F)C=CC=C2F)=CC=C1
DB08913	Radium Ra 223 dichloride	approved	[Cl-].[Cl-].[223Ra++]
DB08916	Afatinib	approved	CN(C)C\C=C\C(=O)NC1=C(O[C@H]2CCOC2)C=C2N=CN=C(NC3=CC(Cl)=C(F)C=C3)C2=C1
DB08918	Levomilnacipran	approved	CCN(CC)C(=O)[C@]1(C[C@H]1CN)C1=CC=CC=C1
DB08930	Dolutegravir	approved	[H][C@]12CN3C=C(C(=O)NCC4=CC=C(F)C=C4F)C(=O)C(O)=C3C(=O)N1[C@H](C)CCO2
DB08931	Riociguat	approved	COC(=O)N(C)C1=C(N)N=C(N=C1N)C1=NN(CC2=C(F)C=CC=C2)C2=C1C=CC=N2
DB08932	Macitentan	approved	CCCNS(=O)(=O)NC1=C(C(OCCOC2=NC=C(Br)C=N2)=NC=N1)C1=CC=C(Br)C=C1
DB08933	Luliconazole	approved	ClC1=CC(Cl)=C(C=C1)[C@@H]1CS\C(S1)=C(\C#N)N1C=CN=C1
DB08934	Sofosbuvir	approved	CC(C)OC(=O)[C@H](C)N[P@](=O)(OC[C@H]1O[C@@H](N2C=CC(=O)NC2=O)[C@](C)(F)[C@@H]1O)OC1=CC=CC=C1
DB08936	Chlorcyclizine	approved	CN1CCN(CC1)C(C1=CC=CC=C1)C1=CC=C(Cl)C=C1
DB08938	Magaldrate	approved	O.[OH-].[OH-].[OH-].[OH-].[OH-].[OH-].[OH-].[OH-].[OH-].[OH-].[OH-].[OH-].[OH-].[OH-].[OH-].[OH-].[OH-].[OH-].[OH-].[OH-].[OH-].[OH-].[OH-].[OH-].[OH-].[OH-].[OH-].[OH-].[OH-].[OH-].[OH-].[Mg++].[Mg++].[Mg++].[Mg++].[Mg++].[Mg++].[Mg++].[Mg++].[Mg++].[Mg++].[Al+3].[Al+3].[Al+3].[Al+3].[Al+3].[O-]S([O-])(=O)=O.[O-]S([O-])(=O)=O
DB08941	Isoxsuprine	approved	C[C@H](COC1=CC=CC=C1)N[C@H](C)[C@@H](O)C1=CC=C(O)C=C1
DB08942	Isoxicam	approved	CN1C(C(=O)NC2=NOC(C)=C2)=C(O)C2=C(C=CC=C2)S1(=O)=O
DB08943	Isoconazole	approved	ClC1=CC(Cl)=C(C=C1)C(CN1C=CN=C1)OCC1=C(Cl)C=CC=C1Cl
DB08944	Isoaminile	approved	CC(C)[C@@](C[C@H](C)N(C)C)(C#N)C1=CC=CC=C1
DB08946	Iopanoic acid	approved	CCC(CC1=C(I)C(N)=C(I)C=C1I)C(O)=O
DB08947	Iopamidol	approved	C[C@H](O)C(=O)NC1=C(I)C(C(=O)NC(CO)CO)=C(I)C(C(=O)NC(CO)CO)=C1I
DB08949	Inositol nicotinate	approved	O=C(O[C@H]1[C@H](OC(=O)C2=CC=CN=C2)[C@@H](OC(=O)C2=CC=CN=C2)[C@H](OC(=O)C2=CC=CN=C2)[C@H](OC(=O)C2=CC=CN=C2)[C@@H]1OC(=O)C1=CC=CN=C1)C1=CC=CN=C1
DB08950	Indoramin	approved	O=C(NC1CCN(CCC2=CNC3=C2C=CC=C3)CC1)C1=CC=CC=C1
DB08958	Hexetidine	approved	CCCCC(CC)CN1CN(CC(CC)CCCC)CC(C)(N)C1
DB08964	Gemeprost	approved	CCCCC(C)(C)[C@H](O)\C=C\[C@H]1[C@H](O)CC(=O)[C@@H]1CCCC\C=C\C(=O)OC
DB08965	Fusafungine	approved	[H]C1(OC(=O)[C@]([H])(C(C)C)N(C)C(=O)C([H])(OC(=O)[C@]([H])(C(C)C)N(C)C(=O)C([H])(OC(=O)[C@]([H])(C(C)C)N(C)C1=O)C(C)C)C(C)C)C(C)C
DB08966	Fursultiamine	approved	C\C(N(CC1=C(N)N=C(C)N=C1)C=O)=C(\CCO)SSCC1CCCO1
DB08967	Dimetotiazine	approved	CC(CN1C2=CC=CC=C2SC2=C1C=C(C=C2)S(=O)(=O)N(C)C)N(C)C
DB08971	Fluocortolone	approved	[H][C@@]12C[C@@H](C)[C@H](C(=O)CO)[C@@]1(C)C[C@H](O)[C@@]1([H])[C@@]2([H])C[C@H](F)C2=CC(=O)C=C[C@]12C
DB08973	Fluclorolone acetonide	approved	[H][C@@]12C[C@@]3([H])[C@]4([H])C[C@H](F)C5=CC(=O)C=C[C@]5(C)[C@@]4(Cl)[C@@H](Cl)C[C@]3(C)[C@@]1(OC(C)(C)O2)C(=O)CO
DB08976	Floctafenine	approved	OCC(O)COC(=O)C1=CC=CC=C1NC1=CC=NC2=C(C=CC=C12)C(F)(F)F
DB08981	Fenbufen	approved	OC(=O)CCC(=O)C1=CC=C(C=C1)C1=CC=CC=C1
DB08985	Etilefrine	approved	CCNCC(O)C1=CC=CC(O)=C1
DB08987	Etidocaine	approved	CCCN(CC)C(CC)C(=O)NC1=C(C)C=CC=C1C
DB08988	Ethoheptazine	approved	CCOC(=O)C1(CCCN(C)CC1)C1=CC=CC=C1
DB08995	Diosmin	approved	COC1=C(O)C=C(C=C1)C1=CC(=O)C2=C(O)C=C(O[C@@H]3O[C@H](CO[C@@H]4O[C@@H](C)[C@H](O)[C@@H](O)[C@H]4O)[C@@H](O)[C@H](O)[C@H]3O)C=C2O1
DB09009	Articaine	approved	CCCNC(C)C(=O)NC1=C(SC=C1C)C(=O)OC
DB09015	Canrenoic acid	approved	[H][C@@]12CC[C@@](O)(CCC(O)=O)[C@@]1(C)CC[C@@]1([H])[C@@]2([H])C=CC2=CC(=O)CC[C@]12C
DB09019	Bromhexine	approved	CN(CC1=CC(Br)=CC(Br)=C1N)C1CCCCC1
DB09020	Bisacodyl	approved	CC(=O)OC1=CC=C(C=C1)C(C1=CC=C(OC(C)=O)C=C1)C1=CC=CC=N1
DB09026	Aliskiren	approved	COCCCOC1=C(OC)C=CC(C[C@@H](C[C@H](N)[C@@H](O)C[C@@H](C(C)C)C(=O)NCC(C)(C)C(N)=O)C(C)C)=C1
DB09027	Ledipasvir	approved	COC(=O)N[C@@H](C(C)C)C(=O)N1CC2(CC2)C[C@H]1C1=NC(=CN1)C1=CC=C2C3=CC=C(C=C3C(F)(F)C2=C1)C1=CC=C2NC(=NC2=C1)[C@@H]1[C@H]2CC[C@H](C2)N1C(=O)[C@@H](NC(=O)OC)C(C)C
DB09030	Vorapaxar	approved	[H][C@@]12C[C@]3([H])C[C@@H](CC[C@@]3([H])[C@H](\C=C\C3=CC=C(C=N3)C3=CC(F)=CC=C3)[C@]1([H])[C@@H](C)OC2=O)NC(=O)OCC
DB09031	Miltefosine	approved	CCCCCCCCCCCCCCCCOP([O-])(=O)OCC[N+](C)(C)C
DB09034	Suvorexant	approved	[H][C@@]1(C)CCN(CCN1C(=O)C1=C(C=CC(C)=C1)N1N=CC=N1)C1=NC2=C(O1)C=CC(Cl)=C2
DB09038	Empagliflozin	approved	OC[C@H]1O[C@H]([C@H](O)[C@@H](O)[C@@H]1O)C1=CC=C(Cl)C(CC2=CC=C(O[C@H]3CCOC3)C=C2)=C1
DB09039	Eliglustat	approved	CCCCCCCC(=O)N[C@H](CN1CCCC1)[C@H](O)C1=CC=C2OCCOC2=C1
DB09040	Efinaconazole	approved	C[C@@H](N1CCC(=C)CC1)[C@](O)(CN1C=NC=N1)C1=C(F)C=C(F)C=C1
DB09041	Tavaborole	approved	OB1OCC2=CC(F)=CC=C12
DB09042	Tedizolid phosphate	approved	CN1N=NC(=N1)C1=CC=C(C=N1)C1=CC=C(C=C1F)N1C[C@H](COP(O)(O)=O)OC1=O
DB09047	Finafloxacin	approved	[H][C@]12CN(C[C@]1([H])OCCN2)C1=C(F)C=C2C(=O)C(=CN(C3CC3)C2=C1C#N)C(O)=O
DB09048	Netupitant	approved	CN(C(=O)C(C)(C)C1=CC(=CC(=C1)C(F)(F)F)C(F)(F)F)C1=CN=C(C=C1C1=CC=CC=C1C)N1CCN(C)CC1
DB09049	Naloxegol	approved	COCCOCCOCCOCCOCCOCCOCCO[C@H]1CC[C@@]2(O)[C@H]3CC4=CC=C(O)C5=C4[C@@]2(CCN3CC=C)[C@H]1O5
DB09050	Ceftolozane	approved	CN1C(N)=C(NC(=O)NCCN)C=[N+]1CC1=C(N2[C@H](SC1)[C@H](NC(=O)C(=N/OC(C)(C)C(O)=O)\C1=NSC(N)=N1)C2=O)C([O-])=O
DB09053	Ibrutinib	approved	NC1=NC=NC2=C1C(=NN2[C@@H]1CCCN(C1)C(=O)C=C)C1=CC=C(OC2=CC=CC=C2)C=C1
DB09054	Idelalisib	approved	[H][C@@](CC)(NC1=NC=NC2=C1N=CN2)C1=NC2=CC=CC(F)=C2C(=O)N1C1=CC=CC=C1
DB09055	Acipimox	approved	CC1=[N+]([O-])C=C(N=C1)C(O)=O
DB09056	Amorolfine	approved	[H]C(C)(CN1C[C@]([H])(C)O[C@]([H])(C)C1)CC1=CC=C(C=C1)C(C)(C)CC
DB09059	Atosiban	approved	[H][C@]1(NC(=O)[C@@]([H])(NC(=O)[C@@H](CC2=CC=C(OCC)C=C2)NC(=O)CCSSC[C@H](NC(=O)[C@H](CC(N)=O)NC1=O)C(=O)N1CCC[C@H]1C(=O)N[C@@H](CCCN)C(=O)NCC(N)=O)[C@@H](C)CC)[C@@H](C)O
DB09060	Avibactam	approved	NC(=O)[C@@H]1CC[C@@H]2CN1C(=O)N2OS(O)(=O)=O
DB09061	Cannabidiol	approved	CCCCCC1=CC(O)=C([C@@H]2C=C(C)CC[C@H]2C(C)=C)C(O)=C1
DB09063	Ceritinib	approved	CC(C)OC1=C(NC2=NC=C(Cl)C(N2)=NC2=CC=CC=C2S(=O)(=O)C(C)C)C=C(C)C(=C1)C1CCNCC1
DB09064	Ciprofibrate	approved	CC(C)(OC1=CC=C(C=C1)C1CC1(Cl)Cl)C(O)=O
DB09065	Cobicistat	approved	CC(C)C1=NC(CN(C)C(=O)N[C@@H](CCN2CCOCC2)C(=O)N[C@H](CC[C@H](CC2=CC=CC=C2)NC(=O)OCC2=CN=CS2)CC2=CC=CC=C2)=CS1
DB09068	Vortioxetine	approved	CC1=CC=C(SC2=CC=CC=C2N2CCNCC2)C(C)=C1
DB09069	Trimetazidine	approved	COC1=C(OC)C(OC)=C(CN2CCNCC2)C=C1
DB09070	Tibolone	approved	[H][C@@]12CC[C@@](O)(C#C)[C@@]1(C)CC[C@]1([H])C3=C(CC(=O)CC3)C[C@@]([H])(C)[C@@]21[H]
DB09071	Tasimelteon	approved	CCC(=O)NC[C@@H]1C[C@H]1C1=CC=CC2=C1CCO2
DB09072	Sodium oxybate	approved	[Na+].OCCCC([O-])=O
DB09073	Palbociclib	approved	CC(=O)C1=C(C)C2=CN=C(NC3=NC=C(C=C3)N3CCNCC3)N=C2N(C2CCCC2)C1=O
DB09074	Olaparib	approved	FC1=CC=C(CC2=NNC(=O)C3=CC=CC=C23)C=C1C(=O)N1CCN(CC1)C(=O)C1CC1
DB09075	Edoxaban	approved	CN(C)C(=O)[C@H]1CC[C@H](NC(=O)C(=O)NC2=NC=C(Cl)C=C2)[C@@H](C1)NC(=O)C1=NC2=C(CN(C)CC2)S1
DB09076	Umeclidinium	approved	OC(C1=CC=CC=C1)(C1=CC=CC=C1)C12CC[N+](CCOCC3=CC=CC=C3)(CC1)CC2
DB09078	Lenvatinib	approved	COC1=C(C=C2C(OC3=CC=C(NC(=O)NC4CC4)C(Cl)=C3)=CC=NC2=C1)C(N)=O
DB09079	Nintedanib	approved	COC(=O)C1=CC=C2C(NC(=O)\C2=C(/NC2=CC=C(C=C2)N(C)C(=O)CN2CCN(C)CC2)C2=CC=CC=C2)=C1
DB09080	Olodaterol	approved	COC1=CC=C(CC(C)(C)NC[C@H](O)C2=C3OCC(=O)NC3=CC(O)=C2)C=C1
DB09081	Idebenone	approved	COC1=C(OC)C(=O)C(CCCCCCCCCCO)=C(C)C1=O
DB09082	Vilanterol	approved	OCC1=C(O)C=CC(=C1)[C@@H](O)CNCCCCCCOCCOCC1=C(Cl)C=CC=C1Cl
DB09083	Ivabradine	approved	COC1=C(OC)C=C2[C@@H](CN(C)CCCN3CCC4=CC(OC)=C(OC)C=C4CC3=O)CC2=C1
DB09084	Benzydamine	approved	CN(C)CCCOC1=NN(CC2=CC=CC=C2)C2=CC=CC=C12
DB09085	Tetracaine	approved	CCCCNC1=CC=C(C=C1)C(=O)OCCN(C)C
DB09086	Eugenol	approved	COC1=C(O)C=CC(CC=C)=C1
DB09087	Potassium alum	approved	[Al+3].[K+].[O-]S([O-])(=O)=O.[O-]S([O-])(=O)=O
DB09088	Amylocaine	approved	CCC(C)(CN(C)C)OC(=O)C1=CC=CC=C1
DB09089	Trimebutine	approved	CCC(COC(=O)C1=CC(OC)=C(OC)C(OC)=C1)(N(C)C)C1=CC=CC=C1
DB09090	Pinaverium	approved	COC1=C(OC)C=C(C[N+]2(CCOCCC3CCC4CC3C4(C)C)CCOCC2)C(Br)=C1
DB09091	Tixocortol	approved	[H][C@@]12CC[C@](O)(C(=O)CS)[C@@]1(C)C[C@H](O)[C@@]1([H])[C@@]2([H])CCC2=CC(=O)CC[C@]12C
DB09092	Xanthinol	approved	CN(CCO)CC(O)CN1C=NC2=C1C(=O)N(C)C(=O)N2C
DB09093	Chlortetracycline	approved	[H][C@@]12C[C@@]3([H])C(=C(O)[C@]1(O)C(=O)C(C(N)=O)=C(O)[C@H]2N(C)C)C(=O)C1=C(O)C=CC(Cl)=C1[C@@]3(C)O
DB09094	Podophyllin	approved	COC1=CC(=CC(OC)=C1OC)C1C2C(COC2=O)C(O)C2=CC3=C(OCO3)C=C12.COC1=CC(=CC(OC)=C1OC)C1C2C(COC2=O)C(O)C2=CC3=C(OCO3)C=C12.COC1=CC(=CC(OC)=C1OC)C1C(C(CO)C(O)C2=CC3=C(OCO3)C=C12)C(O)=O.COC1=CC(=CC(OC)=C1OC)C1C(C(CO)C(O)C2=CC3=C(OCO3)C=C12)C(O)=O
DB09095	Difluocortolone	approved	[H][C@@]12C[C@@H](C)[C@H](C(=O)CO)[C@@]1(C)C[C@H](O)[C@@]1(F)[C@@]2([H])C[C@H](F)C2=CC(=O)C=C[C@]12C
DB09096	Benzoyl peroxide	approved	O=C(OOC(=O)C1=CC=CC=C1)C1=CC=CC=C1
DB09097	Quinagolide	approved	[H][C@]12C[C@@H](CN(CCC)[C@]1([H])CC1=CC=CC(O)=C1C2)NS(=O)(=O)N(CC)CC
DB09099	Somatostatin	approved	C[C@@H](O)[C@@H]1NC(=O)[C@H](CC2=CC=CC=C2)NC(=O)[C@@H](NC(=O)[C@H](CCCCN)NC(=O)[C@H](CC2=CNC3=C2C=CC=C3)NC(=O)[C@H](CC2=CC=CC=C2)NC(=O)[C@H](CC2=CC=CC=C2)NC(=O)[C@H](CC(N)=O)NC(=O)[C@H](CCCCN)NC(=O)[C@H](CSSC[C@H](NC(=O)[C@H](CO)NC1=O)C(O)=O)NC(=O)CNC(=O)[C@H](C)N)[C@@H](C)O
DB09101	Elvitegravir	approved	[H][C@@](CO)(C(C)C)N1C=C(C(O)=O)C(=O)C2=C1C=C(OC)C(CC1=C(F)C(Cl)=CC=C1)=C2
DB09102	Daclatasvir	approved	COC(=O)N[C@@H](C(C)C)C(=O)N1CCC[C@H]1C1=NC=C(N1)C1=CC=C(C=C1)C1=CC=C(C=C1)C1=CN=C(N1)[C@@H]1CCCN1C(=O)[C@@H](NC(=O)OC)C(C)C
DB09104	Magnesium hydroxide	approved	[OH-].[OH-].[Mg++]
DB09110	Coenzyme M	approved	OS(=O)(=O)CCS
DB09112	Nitrous acid	approved	ON=O
DB09114	Colfosceril palmitate	approved	CCCCCCCCCCCCCCCC(=O)OC[C@H](COP([O-])(=O)OCC[N+](C)(C)C)OC(=O)CCCCCCCCCCCCCCC
DB09115	Diiodohydroxyquinoline	approved	OC1=C2N=CC=CC2=C(I)C=C1I
DB09116	Calcium carbimide	approved	[Ca++].[N-]=C=[N-]
DB09117	Paraldehyde	approved	CC1OC(C)OC(C)O1
DB09118	Stiripentol	approved	CC(C)(C)C(O)\C=C\C1=CC2=C(OCO2)C=C1
DB09119	Eslicarbazepine acetate	approved	CC(=O)O[C@H]1CC2=CC=CC=C2N(C(N)=O)C2=CC=CC=C12
DB09120	Zucapsaicin	approved	COC1=C(O)C=CC(CNC(=O)CCCC\C=C/C(C)C)=C1
DB09121	Aurothioglucose	approved	OC[C@H]1O[C@H](S[Au])[C@H](O)[C@@H](O)[C@@H]1O
DB09123	Dienogest	approved	[H][C@@]12CC[C@@](O)(CC#N)[C@@]1(C)CCC1=C3CCC(=O)C=C3CC[C@@]21[H]
DB09124	Medrogestone	approved	[H][C@@]12CC[C@](C)(C(C)=O)[C@@]1(C)CC[C@@]1([H])[C@@]2([H])C=C(C)C2=CC(=O)CC[C@]12C
DB09125	Potassium citrate	approved	[K+].[K+].[K+].OC(CC([O-])=O)(CC([O-])=O)C([O-])=O
DB09128	Brexpiprazole	approved	O=C1NC2=CC(OCCCCN3CCN(CC3)C3=C4C=CSC4=CC=C3)=CC=C2C=C1
DB09129	Chromic chloride	approved	[Cl-].[Cl-].[Cl-].[Cr+3]
DB09130	Copper	approved	[Cu]
DB09131	Cupric Chloride	approved	Cl[Cu]Cl
DB09132	Gadoteric acid	approved	[Gd+3].OC(=O)CN1CCN(CC([O-])=O)CCN(CC([O-])=O)CCN(CC([O-])=O)CC1
DB09133	Iothalamic acid	approved	CNC(=O)C1=C(I)C(C(O)=O)=C(I)C(NC(C)=O)=C1I
DB09134	Ioversol	approved	OCCN(C(=O)CO)C1=C(I)C(C(=O)NCC(O)CO)=C(I)C(C(=O)NCC(O)CO)=C1I
DB09135	Ioxilan	approved	CC(=O)N(CC(O)CO)C1=C(I)C(C(=O)NCC(O)CO)=C(I)C(C(=O)NCCO)=C1I
DB09136	Isosulfan blue	approved	CCN(CC)C1=CC=C(C=C1)C(=C1C=CC(C=C1)=[N+](CC)CC)C1=CC(=CC=C1S(O)(=O)=O)S(O)(=O)=O
DB09137	Technetium Tc-99m mebrofenin	approved	[Tc].CC1=CC(C)=C(Br)C(C)=C1NC(=O)CN(CC(O)=O)CC(O)=O
DB09138	Technetium Tc-99m medronate	approved	O.O.[98Tc+4].[O-]P([O-])(=O)CP([O-])([O-])=O
DB09139	Technetium Tc-99m oxidronate	approved	[99Tc].OC(P(O)(O)=O)P(O)(O)=O
DB09140	Oxygen	approved	O=O
DB09142	Sincalide	approved	CSCC[C@H](NC(=O)[C@H](CC1=CC=C(OS(O)(=O)=O)C=C1)NC(=O)[C@@H](N)CC(O)=O)C(=O)NCC(=O)N[C@@H](CC1=CNC2=CC=CC=C12)C(=O)N[C@@H](CCSC)C(=O)N[C@@H](CC(O)=O)C(=O)N[C@@H](CC1=CC=CC=C1)C(N)=O
DB09143	Sonidegib	approved	[H][C@]1(C)CN(C[C@@]([H])(C)O1)C1=CC=C(NC(=O)C2=CC=CC(=C2C)C2=CC=C(OC(F)(F)F)C=C2)C=N1
DB09144	Uridine triacetate	approved	CC(=O)OC[C@H]1O[C@H]([C@H](OC(C)=O)[C@@H]1OC(C)=O)N1C=CC(=O)NC1=O
DB09145	Water	approved	O
DB09146	Iron sucrose	approved	O.O.O.[OH-].[O--].[O--].[O--].[O--].[O--].[O--].[O--].[O--].[Na+].[Na+].[Fe+3].[Fe+3].[Fe+3].[Fe+3].[Fe+3].OC[C@H]1O[C@@](CO)(O[C@H]2O[C@H](CO)[C@@H](O)[C@H](O)[C@H]2O)[C@@H](O)[C@@H]1O
DB09148	Florbetaben (18F)	approved	CNC1=CC=C(\C=C\C2=CC=C(OCCOCCOCC[18F])C=C2)C=C1
DB09149	Florbetapir (18F)	approved	[H]N(C1=C([H])C([H])=C(\C([H])=C(/[H])C2=C([H])N=C(OC([H])([H])C([H])([H])OC([H])([H])C([H])([H])OC([H])([H])C([H])([H])[18F])C([H])=C2[H])C([H])=C1[H])C([H])([H])[H]
DB09151	Flutemetamol (18F)	approved	CNC1=C([18F])C=C(C=C1)C1=NC2=CC=C(O)C=C2S1
DB09152	Nitrogen	approved	N#N
DB09153	Sodium chloride	approved	[Na+].[Cl-]
DB09154	Sodium citrate	approved	[Na+].[Na+].[Na+].OC(CC([O-])=O)(CC([O-])=O)C([O-])=O
DB09155	Helium	approved	[He]
DB09156	Iopromide	approved	COCC(=O)NC1=C(I)C(C(=O)N(C)CC(O)CO)=C(I)C(C(=O)NCC(O)CO)=C1I
DB09157	Carbon dioxide	approved	O=C=O
DB09158	Trypan blue free acid	approved	CC1=CC(=CC=C1\N=N\C1=C(C=C2C=C(C=C(N)C2=C1O)S(O)(=O)=O)S(O)(=O)=O)C1=CC(C)=C(C=C1)\N=N\C1=C(O)C2=C(N)C=C(C=C2C=C1S(O)(=O)=O)S(O)(=O)=O
DB09160	Technetium Tc-99m tetrofosmin	approved	O.O.[98Tc].CCOCCP(CCOCC)CCP(CCOCC)CCOCC.CCOCCP(CCOCC)CCP(CCOCC)CCOCC
DB09161	Technetium Tc-99m sestamibi	approved	[Tc+].COC(C)(C)C[N+]#[C-].COC(C)(C)C[N+]#[C-].COC(C)(C)C[N+]#[C-].COC(C)(C)C[N+]#[C-].COC(C)(C)C[N+]#[C-].COC(C)(C)C[N+]#[C-]
DB09164	Technetium Tc-99m disofenin	approved	[99Tc].CC(C)C1=CC=CC(C(C)C)=C1NC(=O)CN(CC(O)=O)CC(O)=O
DB09165	Technetium Tc-99m pyrophosphate	approved	[99Tc+4].[O-]P([O-])(=O)OP([O-])([O-])=O
DB09167	Dosulepin	approved	CN(C)CC\C=C1/C2=CC=CC=C2CSC2=CC=CC=C12
DB09183	Dasabuvir	approved	COC1=C(C=C(C=C1C1=CC2=CC=C(NS(C)(=O)=O)C=C2C=C1)N1C=CC(=O)NC1=O)C(C)(C)C
DB09185	Viloxazine	approved	CCOC1=CC=CC=C1OCC1CNCCO1
DB09195	Lorpiprazole	approved	[H][C@@]12CCC[C@]1([H])C1=NN=C(CCN3CCN(CC3)C3=CC=CC(=C3)C(F)(F)F)N1C2
DB09205	Moxisylyte	approved	CC(C)C1=C(OCCN(C)C)C=C(C)C(OC(C)=O)=C1
DB09209	Pholcodine	approved	[H][C@@]12OC3=C(OCCN4CCOCC4)C=CC4=C3[C@@]11CCN(C)[C@]([H])(C4)[C@]1([H])C=C[C@@H]2O
DB09210	Piracetam	approved	NC(=O)CN1CCCC1=O
DB09212	Loxoprofen	approved	CC(C(O)=O)C1=CC=C(CC2CCCC2=O)C=C1
DB09213	Dexibuprofen	approved	CC(C)CC1=CC=C(C=C1)[C@H](C)C(O)=O
DB09214	Dexketoprofen	approved	[H][C@@](C)(C(O)=O)C1=CC(=CC=C1)C(=O)C1=CC=CC=C1
DB09216	Tolfenamic acid	approved	CC1=C(Cl)C=CC=C1NC1=CC=CC=C1C(O)=O
DB09219	Bisoxatin	approved	OC1=CC=C(C=C1)C1(OC2=CC=CC=C2NC1=O)C1=CC=C(O)C=C1
DB09220	Nicorandil	approved	[O-][N+](=O)OCCNC(=O)C1=CC=CN=C1
DB09225	Zotepine	approved	CN(C)CCOC1=CC2=CC=CC=C2SC2=CC=C(Cl)C=C12
DB09236	Lacidipine	approved	CCOC(=O)C1=C(C)NC(C)=C(C1C1=CC=CC=C1\C=C\C(=O)OC(C)(C)C)C(=O)OCC
DB09237	Levamlodipine	approved	CCOC(=O)C1=C(COCCN)NC(C)=C([C@@H]1C1=CC=CC=C1Cl)C(=O)OC
DB09238	Manidipine	approved	COC(=O)C1=C(C)NC(C)=C(C1C1=CC(=CC=C1)N(=O)=O)C(=O)OCCN1CCN(CC1)C(C1=CC=CC=C1)C1=CC=CC=C1
DB09241	Methylene blue	approved	[Cl-].CN(C)C1=CC2=[S+]C3=C(C=CC(=C3)N(C)C)N=C2C=C1
DB09242	Moxonidine	approved	COC1=NC(C)=NC(Cl)=C1NC1=NCCN1
DB09256	Tegafur	approved	FC1=CN(C2CCCO2)C(=O)NC1=O
DB09257	Gimeracil	approved	OC1=CC(=O)NC=C1Cl
DB09267	Strontium ranelate	approved	[Sr++].[Sr++].[O-]C(=O)CN(CC([O-])=O)C1=C(C#N)C(CC([O-])=O)=C(S1)C([O-])=O
DB09268	Picosulfuric acid	approved	OS(=O)(=O)OC1=CC=C(C=C1)C(C1=CC=C(OS(O)(=O)=O)C=C1)C1=CC=CC=N1
DB09269	Phenylacetic acid	approved	OC(=O)CC1=CC=CC=C1
DB09270	Ubidecarenone	approved	COC1=C(OC)C(=O)C(C\C=C(/C)CC\C=C(/C)CC\C=C(/C)CC\C=C(/C)CC\C=C(/C)CC\C=C(/C)CC\C=C(/C)CC\C=C(/C)CC\C=C(/C)CCC=C(C)C)=C(C)C1=O
DB09272	Eluxadoline	approved	COC1=CC=C(CN([C@@H](C)C2=NC(=CN2)C2=CC=CC=C2)C(=O)[C@@H](N)CC2=C(C)C=C(C=C2C)C(N)=O)C=C1C(O)=O
DB09274	Artesunate	approved	[H][C@@]12CC[C@@H](C)[C@]3([H])CC[C@@]4(C)OO[C@@]13[C@]([H])(O[C@@H](OC(=O)CCC(O)=O)[C@@H]2C)O4
DB09275	Bismuth subcitrate potassium	approved	[K+].[K+].[K+].[K+].[K+].[Bi+3].[O-]C(=O)CC([O-])(CC([O-])=O)C([O-])=O.[O-]C(=O)CC([O-])(CC([O-])=O)C([O-])=O
DB09276	Sodium aurothiomalate	approved	[Na+].[Na+].[O-]C(=O)CC(S[Au])C([O-])=O
DB09277	Choline C 11	approved	[Cl-].C[N+](C)([11CH3])CCO
DB09278	Activated charcoal	approved	[C]
DB09280	Lumacaftor	approved	CC1=CC=C(NC(=O)C2(CC2)C2=CC=C3OC(F)(F)OC3=C2)N=C1C1=CC(=CC=C1)C(O)=O
DB09281	Magnesium trisilicate	approved	[Mg++].[Mg++].[O-][Si](=O)O[Si]([O-])([O-])O[Si]([O-])=O
DB09282	Molsidomine	approved	CCOC(=O)[N-]C1=C[N+](=NO1)N1CCOCC1
DB09291	Rolapitant	approved	C[C@@H](OC[C@]1(CC[C@]2(CCC(=O)N2)CN1)C1=CC=CC=C1)C1=CC(=CC(=C1)C(F)(F)F)C(F)(F)F
DB09292	Sacubitril	approved	CCOC(=O)[C@H](C)C[C@@H](CC1=CC=C(C=C1)C1=CC=CC=C1)NC(=O)CCC(O)=O
DB09293	Iodide I-131	approved	[131I-]
DB09296	Ombitasvir	approved	COC(=O)N[C@@H](C(C)C)C(=O)N1CCC[C@H]1C(=O)NC1=CC=C(C=C1)[C@@H]1CC[C@H](N1C1=CC=C(C=C1)C(C)(C)C)C1=CC=C(NC(=O)[C@@H]2CCCN2C(=O)[C@@H](NC(=O)OC)C(C)C)C=C1
DB09297	Paritaprevir	approved	[H][C@@]12C[C@]1(NC(=O)[C@]1([H])C[C@H](CN1C(=O)[C@H](CCCCC\C=C/2)NC(=O)C1=CN=C(C)C=N1)OC1=NC2=C(C=CC=C2)C2=C1C=CC=C2)C(=O)NS(=O)(=O)C1CC1
DB09299	Tenofovir alafenamide	approved	CC(C)OC(=O)[C@H](C)N[P@](=O)(CO[C@H](C)CN1C=NC2=C(N)N=CN=C12)OC1=CC=CC=C1
DB09300	Butylscopolamine	approved	CCCC[N+]1(C)[C@H]2C[C@@H](C[C@@H]1[C@H]1O[C@@H]21)OC(=O)[C@H](CO)C1=CC=CC=C1
DB09313	Ioxaglic acid	approved	CNC(=O)C1=C(I)C(C(=O)NCC(=O)NC2=C(I)C(C(O)=O)=C(I)C(C(=O)NCCO)=C2I)=C(I)C(N(C)C(C)=O)=C1I
DB09314	Technetium Tc-99m pertechnetate	approved	O.O.O.O.[98Tc-]
DB09315	Xenon-133	approved	[133Xe]
DB09316	Thallous chloride	approved	[Cl-].[Tl+]
DB09319	Carindacillin	approved	[H][C@]12SC(C)(C)[C@@H](N1C(=O)[C@H]2NC(=O)C(C(=O)OC1=CC2=C(CCC2)C=C1)C1=CC=CC=C1)C(O)=O
DB09320	Procaine benzylpenicillin	approved	CCN(CC)CCOC(=O)C1=CC=C(N)C=C1.[H][C@]12SC(C)(C)[C@@H](N1C(=O)[C@H]2NC(=O)CC1=CC=CC=C1)C(O)=O
DB09321	Zinc oxide	approved	O=[Zn]
DB09322	Zinc sulfate	approved	[Zn++].[O-]S([O-])(=O)=O
DB09324	Sulbactam	approved	[H][C@@]12CC(=O)N1[C@@]([H])(C(O)=O)C(C)(C)S2(=O)=O
DB09325	Sodium fluoride	approved	[F-].[Na+]
DB09326	Ammonia N-13	approved	[13NH3]
DB09327	Tegafur-uracil	approved	O=C1NC=CC(=O)N1.FC1=CN(C2CCCO2)C(=O)NC1=O
DB09330	Osimertinib	approved	COC1=C(NC2=NC=CC(=N2)C2=CN(C)C3=C2C=CC=C3)C=C(NC(=O)C=C)C(=C1)N(C)CCN(C)C
DB09332	Kappadione	approved	[Na+].[Na+].[Na+].[Na+].CC1=C(OP([O-])([O-])=O)C2=CC=CC=C2C(OP([O-])([O-])=O)=C1
DB09333	Iopodic acid	approved	CN(C)C=NC1=C(I)C=C(I)C(CCC(O)=O)=C1I
DB09335	Alatrofloxacin	approved	[H][C@@]12CN(C[C@]1([H])[C@H]2NC(=O)[C@H](C)NC(=O)[C@H](C)N)C1=NC2=C(C=C1F)C(=O)C(=CN2C1=CC=C(F)C=C1F)C(O)=O
DB09340	Tyropanoic acid	approved	CCCC(=O)NC1=C(I)C=C(I)C(CC(CC)C(O)=O)=C1I
DB09342	Propoxycaine	approved	CCCOC1=CC(N)=CC=C1C(=O)OCCN(CC)CC
DB09343	Tipiracil	approved	ClC1=C(CN2CCCC2=N)NC(=O)NC1=O
DB09345	Pramocaine	approved	CCCCOC1=CC=C(OCCCN2CCOCC2)C=C1
DB09346	Metrizoic acid	approved	CN(C(C)=O)C1=C(I)C(C(O)=O)=C(I)C(NC(C)=O)=C1I
DB09348	Propiolactone	approved	O=C1CCO1
DB09350	Piperonyl butoxide	approved	CCCCOCCOCCOCC1=CC2=C(OCO2)C=C1CCC
DB09351	Levobetaxolol	approved	CC(C)NC[C@H](O)COC1=CC=C(CCOCC2CC2)C=C1
DB09352	Hydroxyamphetamine	approved	CC(N)CC1=CC=C(O)C=C1
DB09353	Octasulfur	approved	S1SSSSSSS1
DB09355	Sulfabenzamide	approved	NC1=CC=C(C=C1)S(=O)(=O)NC(=O)C1=CC=CC=C1
DB09357	Dexpanthenol	approved	CC(C)(CO)[C@@H](O)C(=O)NCCCO
DB09364	Procaine merethoxylline	approved	O.[Hg+].CCN(CC)CCOC(=O)C1=CC=C(N)C=C1.[CH2]C(CN=C(O)C1=CC=CC=C1OCC([O-])=O)OCCOC
DB09366	Propyliodone	approved	CCCOC(=O)CN1C=C(I)C(=O)C(I)=C1
DB09370	Sodium phosphate P 32	approved	[Na+].[Na+].O[32P]([O-])([O-])=O
DB09371	Norethynodrel	approved	[H][C@@]12CC[C@@](O)(C#C)[C@@]1(C)CC[C@]1([H])C3=C(CC[C@@]21[H])CC(=O)CC3
DB09372	Tannic acid	approved	OC1=CC(=CC(O)=C1O)C(=O)OC1=C(O)C(O)=CC(=C1)C(=O)OC[C@H]1OC(OC(=O)C2=CC(OC(=O)C3=CC(O)=C(O)C(O)=C3)=C(O)C(O)=C2)[C@H](OC(=O)C2=CC(OC(=O)C3=CC(O)=C(O)C(O)=C3)=C(O)C(O)=C2)[C@@H](OC(=O)C2=CC(OC(=O)C3=CC(O)=C(O)C(O)=C3)=C(O)C(O)=C2)[C@@H]1OC(=O)C1=CC(OC(=O)C2=CC(O)=C(O)C(O)=C2)=C(O)C(O)=C1
DB09374	Indocyanine green acid form	approved	CC1(C)\C(=C\C=C\C=C\C=C\C2=[N+](CCCCS(O)(=O)=O)C3=C(C4=CC=CC=C4C=C3)C2(C)C)N(CCCCS(O)(=O)=O)C2=C1C1=CC=CC=C1C=C2
DB09376	Lapyrium	approved	CCCCCCCCCCCC(=O)OCCNC(=O)C[N+]1=CC=CC=C1
DB09377	Undecoylium chloride iodine complex	approved	[Cl-].CCC(=O)OCCNC(=O)C[N+]1=CC=CC=C1
DB09378	Fluprednisolone	approved	[H][C@@]12CC[C@](O)(C(=O)CO)[C@@]1(C)C[C@H](O)[C@@]1([H])[C@@]2([H])C[C@H](F)C2=CC(=O)C=C[C@]12C
DB09380	Sodium chromate Cr-51	approved	[Na+].[Na+].[O-][51Cr]([O-])(=O)=O
DB09382	Iodohippurate sodium I-131	approved	[Na+].[O-]C(=O)CNC(=O)C1=C([131I])C=CC=C1
DB09383	Meprednisone	approved	[H][C@]1(C)C[C@@]2([H])[C@]3([H])CCC4=CC(=O)C=C[C@]4(C)[C@@]3([H])C(=O)C[C@]2(C)[C@@]1(O)C(=O)CO
DB09385	Cyanocobalamin Co-57	approved	[57Co+3].[C-]#N.C[C@H](CNC(=O)CC[C@]1(C)[C@@H](CC(N)=O)C2[N-]\C1=C(C)/C1=N/C(=C\C3=N\C(=C(C)/C4=N[C@]2(C)[C@@](C)(CC(N)=O)[C@@H]4CCC(N)=O)\[C@@](C)(CC(N)=O)[C@@H]3CCC(N)=O)/C(C)(C)[C@@H]1CCC(N)=O)OP([O-])(=O)O[C@@H]1[C@@H](CO)O[C@@H]([C@@H]1O)N1C=[NH]C2=C1C=C(C)C(C)=C2
DB09387	Cyanocobalamin Co-60	approved	[60Co+3].[C-]#N.C[C@H](CNC(=O)CC[C@]1(C)[C@@H](CC(N)=O)C2[N-]\C1=C(C)/C1=N/C(=C\C3=N\C(=C(C)/C4=N[C@]2(C)[C@@](C)(CC(N)=O)[C@@H]4CCC(N)=O)\[C@@](C)(CC(N)=O)[C@@H]3CCC(N)=O)/C(C)(C)[C@@H]1CCC(N)=O)OP([O-])(=O)O[C@@H]1[C@@H](CO)O[C@@H]([C@@H]1O)N1C=NC2=C1C=C(C)C(C)=C2
DB09388	Rose bengal I-131	approved	OC(=O)C1=C(C(Cl)=C(Cl)C(Cl)=C1Cl)C1=C2C=C([131I])C(=O)C([131I])=C2OC2=C([131I])C(O)=C([131I])C=C12
DB09389	Norgestrel	approved	CCC12CCC3C(CCC4=CC(=O)CCC34)C1CCC2(O)C#C
DB09394	Phosphoric acid	approved	OP(O)(O)=O
DB09395	Sodium acetate	approved	[Na+].CC([O-])=O
DB09397	Technetium Tc-99m sulfur colloid	approved	[99Tc].S1SSSSSSS1
DB09398	Fluoride ion F-18	approved	[18F-]
DB09400	Selenomethionine Se-75	approved	C[75Se]CC[C@H](N)C(O)=O
DB09401	Isosorbide	approved	[H][C@]1(O)CO[C@]2([H])[C@]([H])(O)CO[C@]12[H]
DB09403	Iocetamic acid	approved	CC(CN(C(C)=O)C1=C(I)C=C(I)C(N)=C1I)C(O)=O
DB09406	Chlormerodrin Hg-197	approved	[Cl-].COC(C[197Hg+])CNC(N)=O
DB09407	Magnesium chloride	approved	[Mg++].[Cl-].[Cl-]
DB09409	Magnesium acetate tetrahydrate	approved	O.O.O.O.[Mg++].CC([O-])=O.CC([O-])=O
DB09411	Technetium Tc-99m etidronate	approved	[99Tc].CC(O)(P(O)(O)=O)P(O)(O)=O
DB09413	Monopotassium phosphate	approved	[K+].OP(O)([O-])=O
DB09414	Dipotassium phosphate	approved	[K+].[K+].OP([O-])([O-])=O
DB09415	Meglumine	approved	CNC[C@H](O)[C@@H](O)[C@H](O)[C@H](O)CO
DB09418	Potassium perchlorate	approved	[K+].[O-][Cl](=O)(=O)=O
DB09419	Xylose	approved	OC[C@@H](O)[C@H](O)[C@@H](O)C=O
DB09420	Iodide I-123	approved	[123I-]
DB09421	Protirelin	approved	[H][C@@](CC1=CN=CN1)(NC(=O)[C@]1([H])CCC(=O)N1)C(=O)N1CCC[C@@]1([H])C(N)=O
DB09425	Indium In-111 pentetate	approved	[111In+3].OC(=O)CN(CCN(CCN(CC([O-])=O)CC([O-])=O)CC([O-])=O)CC(O)=O
DB09436	Technetium Tc-99m succimer	approved	[99Tc].OC(=O)[C@@H](S)[C@@H](S)C(O)=O
DB09443	Krypton Kr 81m	approved	[81Kr]
DB09448	Iodohippurate sodium I-123	approved	[Na+].[O-]C(=O)CNC(=O)C1=CC=CC=C1[123I]
DB09449	Sodium phosphate, monobasic	approved	[Na+].OP(O)([O-])=O
DB09460	Sodium carbonate	approved	[Na+].[Na+].[O-]C([O-])=O
DB09461	Xenon Xe-127	approved	[127Xe]
DB09462	Glycerin	approved	OCC(O)CO
DB09472	Sodium sulfate	approved	[Na+].[Na+].[O-]S([O-])(=O)=O
DB09473	Indium In-111 oxyquinoline	approved	[111In+3].[O-]C1=CC=CC2=C1N=CC=C2.[O-]C1=CC=CC2=C1N=CC=C2.[O-]C1=CC=CC2=C1N=CC=C2
DB09477	Enalaprilat	approved	[H][C@@](C)(N[C@@]([H])(CCC1=CC=CC=C1)C(O)=O)C(=O)N1CCC[C@@]1([H])C(O)=O
DB09479	Rubidium Rb-82	approved	[82Rb+]
DB09480	Iofetamine I-123	approved	CC(C)NC(C)CC1=CC=C([123I])C=C1
DB09481	Magnesium carbonate	approved	[Mg++].[O-]C([O-])=O
DB09483	Potassium lactate	approved	[K+].CC(O)C([O-])=O
DB09484	Sodium fluorophosphate	approved	[Na+].[Na+].[O-]P([O-])(F)=O
DB09487	Iotrolan	approved	CN(C(=O)CC(=O)N(C)C1=C(I)C(C(=O)NC(CO)C(O)CO)=C(I)C(C(=O)NC(CO)C(O)CO)=C1I)C1=C(I)C(C(=O)NC(CO)C(O)CO)=C(I)C(C(=O)NC(CO)C(O)CO)=C1I
DB09488	Acrivastine	approved	[H]\C(CN1CCCC1)=C(\C1=CC=C(C)C=C1)C1=CC=CC(=N1)C(\[H])=C(/[H])C(O)=O
DB09490	Indium In-111 chloride	approved	Cl[111In](Cl)Cl
DB09494	Cetyl alcohol	approved	CCCCCCCCCCCCCCCCO
DB09495	Avobenzone	approved	COC1=CC=C(C=C1)C(=O)CC(=O)C1=CC=C(C=C1)C(C)(C)C
DB09496	Octinoxate	approved	[H]\C(=C(\[H])C1=CC=C(OC)C=C1)C(=O)OCC(CC)CCCC
DB09498	Strontium chloride Sr-89	approved	[Cl-].[Cl-].[89Sr++]
DB09499	Thiosulfuric acid	approved	OS(O)(=O)=S
DB09501	Ferric ammonium citrate	approved	N.[Fe+3].OC(=O)CC(O)(CC(O)=O)C(O)=O
DB09502	Fludeoxyglucose (18F)	approved	[H]C(=O)[C@H]([18F])[C@@H](O)[C@H](O)[C@H](O)CO
DB09510	Urea C-13	approved	N[13C](N)=O
DB09511	Talc	approved	[O--].[O--].[O--].[O--].[O--].[O--].[O--].[O--].[O--].[O--].[Mg++].[Mg++].[Mg++].[Si+4].[Si+4].[Si+4].[Si+4].[O-][H].[O-][H]
DB09512	Simethicone	approved	O=[Si]=O.CO[Si](C)(C)O[Si](C)(C)C
DB09513	Urea C-14	approved	N[14C](N)=O
DB09516	Mequinol	approved	COC1=CC=C(O)C=C1
DB09517	Sodium ferric gluconate complex	approved	[O--].[O--].[O--].[Na+].[Fe+3].[Fe+3].OC[C@@H](O)[C@@H](O)[C@H](O)[C@@H](O)C([O-])=O.OC[C@H]1O[C@@](CO)(O[C@H]2O[C@H](CO)[C@@H](O)[C@H](O)[C@H]2O)[C@@H](O)[C@@H]1O.OC[C@H]1O[C@@](CO)(O[C@H]2O[C@H](CO)[C@@H](O)[C@H](O)[C@H]2O)[C@@H](O)[C@@H]1O.OC[C@H]1O[C@@](CO)(O[C@H]2O[C@H](CO)[C@@H](O)[C@H](O)[C@H]2O)[C@@H](O)[C@@H]1O.OC[C@H]1O[C@@](CO)(O[C@H]2O[C@H](CO)[C@@H](O)[C@H](O)[C@H]2O)[C@@H](O)[C@@H]1…
DB09526	Hydroquinone	approved	OC1=CC=C(O)C=C1
DB09531	Perflexane	approved	FC(F)(F)C(F)(F)C(F)(F)C(F)(F)C(F)(F)C(F)(F)F
DB09534	Ecamsule	approved	CC1(C)C2CCC1(CS(O)(=O)=O)C(=O)C2=CC1=CC=C(C=C2C3CCC(CS(O)(=O)=O)(C2=O)C3(C)C)C=C1
DB09535	Octocrylene	approved	CCCCC(CC)COC(=O)C(C#N)=C(C1=CC=CC=C1)C1=CC=CC=C1
DB09536	Titanium dioxide	approved	O=[Ti]=O
DB09543	Methyl salicylate	approved	COC(=O)C1=CC=CC=C1O
DB09546	Iobenguane sulfate I-123	approved	OS(O)(=O)=O.NC(=N)NCC1=CC([123I])=CC=C1.NC(=N)NCC1=CC([123I])=CC=C1
DB09550	Tetracycline phosphate complex	approved	[Na+].OP(=O)=O.OP(=O)=O.OP(=O)=O.OP(=O)=O.OP(=O)=O.[O-]P(=O)=O.[H][C@@]12C[C@@]3([H])C(=C(O)[C@]1(O)C(=O)C(C(N)=O)=C(O)[C@H]2N(C)C)C(=O)C1=C(O)C=CC=C1[C@@]3(C)O.[H][C@@]12C[C@@]3([H])C(=C(O)[C@]1(O)C(=O)C(C(N)=O)=C(O)[C@H]2N(C)C)C(=O)C1=C(O)C=CC=C1[C@@]3(C)O.[H][C@@]12C[C@@]3([H])C(=C(O)[C@]1(O)C(=O)C(C(N)=O)=C(O)[C@H]2N(C)C)C(=O)C1=C(O)C=CC=C1[C@@]3(C)O.[H][C@@]12C[C@@]3([H])C(=C(O)[C@]1(O)C(=O)…
DB09552	Thonzonium	approved	CCCCCCCCCCCCCCCC[N+](C)(C)CCN(CC1=CC=C(OC)C=C1)C1=NC=CC=N1
DB09555	Dexchlorpheniramine maleate	approved	OC(=O)\C=C/C(O)=O.CN(C)CC[C@@H](C1=CC=C(Cl)C=C1)C1=CC=CC=N1
DB09561	Sodium glycerophosphate	approved	[Na+].[Na+].OCC(O)COP([O-])([O-])=O
DB09563	Choline C-11	approved	C[N+](C)([11CH3])CCO
DB09570	Ixazomib	approved	CC(C)C[C@H](NC(=O)CNC(=O)C1=CC(Cl)=CC=C1Cl)B(O)O
DB09571	Levmetamfetamine	approved	CN[C@H](C)CC1=CC=CC=C1
DB11056	Stannous chloride	approved	[Cl-].[Cl-].[Sn++]
DB11062	Octisalate	approved	CCCCC(CC)COC(=O)C1=C(O)C=CC=C1
DB11064	Homosalate	approved	CC1CC(CC(C)(C)C1)OC(=O)C1=C(O)C=CC=C1
DB11068	Selenic acid	approved	O[Se](O)(=O)=O
DB11071	Phenyl salicylate	approved	OC1=CC=CC=C1C(=O)OC1=CC=CC=C1
DB11072	Hydrogen fluoride	approved	F
DB11073	Cetylpyridinium	approved	CCCCCCCCCCCCCCCC[N+]1=CC=CC=C1
DB11079	Trolamine salicylate	approved	OCCN(CCO)CCO.OC(=O)C1=CC=CC=C1O
DB11080	Silver nitrate	approved	[Ag+].[O-]N(=O)=O
DB11081	Aluminum chloride	approved	Cl[Al](Cl)Cl
DB11085	Resorcinol	approved	OC1=CC(O)=CC=C1
DB11089	Docusate	approved	CCCCC(CC)COC(=O)CC(C(=O)OCC(CC)CCCC)S(O)(=O)=O
DB11090	Potassium nitrate	approved	[K+].[O-][N+]([O-])=O
DB11091	Hydrogen peroxide	approved	OO
DB11092	Stannous fluoride	approved	F[Sn]F
DB11093	Calcium citrate	approved	[Ca++].[Ca++].[Ca++].OC(CC([O-])=O)(CC([O-])=O)C([O-])=O.OC(CC([O-])=O)(CC([O-])=O)C([O-])=O
DB11096	Meradimate	approved	CC(C)C1CCC(C)CC1OC(=O)C1=CC=CC=C1N
DB11098	Potassium bicarbonate	approved	[K+].OC([O-])=O
DB11100	Allantoin	approved	NC(=O)NC1NC(=O)NC1=O
DB11102	N-acetyltyrosine	approved	CC(=O)N[C@@H](CC1=CC=C(O)C=C1)C(O)=O
DB11104	Sulfur hexafluoride	approved	FS(F)(F)(F)(F)F
DB11110	Magnesium citrate	approved	[Mg++].[Mg++].[Mg++].OC(CC([O-])=O)(CC([O-])=O)C([O-])=O.OC(CC([O-])=O)(CC([O-])=O)C([O-])=O
DB11115	Ensulizole	approved	OS(=O)(=O)C1=CC2=C(C=C1)N=C(N2)C1=CC=CC=C1
DB11117	Undecylenic acid	approved	OC(=O)CCCCCCCCC=C
DB11119	Sodium iodide	approved	[Na+].[I-]
DB11121	Chloroxylenol	approved	CC1=CC(O)=CC(C)=C1Cl
DB11123	Hypochlorite	approved	[O-]Cl
DB11125	Benzethonium	approved	CC(C)(C)CC(C)(C)C1=CC=C(OCCOCC[N+](C)(C)CC2=CC=CC=C2)C=C1
DB11126	Calcium gluconate	approved	[Ca++].[H][C@@](O)(CO)[C@@]([H])(O)[C@]([H])(O)[C@@]([H])(O)C([O-])=O.[H][C@@](O)(CO)[C@@]([H])(O)[C@]([H])(O)[C@@]([H])(O)C([O-])=O
DB11127	Selenious acid	approved	O[Se](O)=O
DB11129	Carbamide peroxide	approved	OO.NC(N)=O
DB11132	Silicon dioxide	approved	O=[Si]=O
DB11134	Cupric oxide	approved	[O--].[Cu++]
DB11135	Selenium	approved	[Se]
DB11136	Chromium	approved	[Cr]
DB11137	Molybdenum	approved	[Mo]
DB11140	Chromium Cr-51	approved	[51Cr]
DB11141	Manganese gluconate	approved	[Mn++].[H][C@@](O)(CO)[C@@]([H])(O)[C@]([H])(O)[C@@]([H])(O)C([O-])=O.[H][C@@](O)(CO)[C@@]([H])(O)[C@]([H])(O)[C@@]([H])(O)C([O-])=O
DB11142	Selenomethionine	approved	C[Se]CC[C@H](N)C(O)=O
DB11145	Oxyquinoline	approved	OC1=CC=CC2=C1N=CC=C2
DB11148	Butamben	approved	CCCCOC(=O)C1=CC=C(N)C=C1
DB11150	Barium sulfate	approved	[Ba++].[O-]S([O-])(=O)=O
DB11151	Sodium hydroxide	approved	[OH-].[Na+]
DB11153	Potassium hydroxide	approved	[OH-].[K+]
DB11155	Triclocarban	approved	ClC1=CC=C(NC(=O)NC2=CC(Cl)=C(Cl)C=C2)C=C1
DB11156	Pyrantel	approved	[H]\C(=C(\[H])C1=NCCCN1C)C1=CC=CS1
DB11157	Anthralin	approved	OC1=CC=CC2=C1C(=O)C1=C(O)C=CC=C1C2
DB11159	Sodium sulfide	approved	[Na+].[Na+].[S--]
DB11160	Phenyltoloxamine	approved	CN(C)CCOC1=CC=CC=C1CC1=CC=CC=C1
DB11164	Bicisate	approved	CCOC(=O)[C@H](CS)NCCN[C@@H](CS)C(=O)OCC
DB11168	Calcium threonate	approved	[Ca++].OC[C@H](O)[C@@H](O)C([O-])=O.OC[C@H](O)[C@@H](O)C([O-])=O
DB11171	Ferric sulfate	approved	O.O.O.O.O.[Fe+3].[Fe+3].[O-]S([O-])(=O)=O.[O-]S([O-])(=O)=O.[O-]S([O-])(=O)=O
DB11176	Zeaxanthin	approved	C\C(\C=C\C=C(/C)\C=C\C1=C(C)C[C@@H](O)CC1(C)C)=C/C=C/C=C(\C)/C=C/C=C(\C)/C=C/C1=C(C)C[C@@H](O)CC1(C)C
DB11179	Exametazime	approved	C[C@@H](NCC(C)(C)CN[C@H](C)C(\C)=N\O)C(\C)=N\O
DB11180	Tetrofosmin	approved	CCOCCP(CCOCC)CCP(CCOCC)CCOCC
DB11181	Homatropine	approved	[H][C@]12CC[C@]([H])(C[C@@H](C1)OC(=O)C(O)C1=CC=CC=C1)N2C
DB11182	Rose bengal	approved	OC(=O)C1=C(Cl)C(Cl)=C(Cl)C(Cl)=C1C1=C2C=C(I)C(=O)C(I)=C2OC2=C(I)C(O)=C(I)C=C12
DB11183	Light green SF yellowish	approved	[Na+].[Na+].CCN(CC1=CC(=CC=C1)S([O-])(=O)=O)C1=CC=C(C=C1)C(C1=CC=C(C=C1)S([O-])(=O)=O)=C1C=CC(C=C1)=[N+](CC)CC1=CC(=CC=C1)S([O-])(=O)=O
DB11184	Oftasceine	approved	OC(=O)CN(CC(O)=O)CC1=CC2=C(OC3=CC(O)=C(CN(CC(O)=O)CC(O)=O)C=C3C22OC(=O)C3=CC=CC=C23)C=C1O
DB11186	Pentoxyverine	approved	CCN(CC)CCOCCOC(=O)C1(CCCC1)C1=CC=CC=C1
DB11189	Magnesium glycinate	approved	[Mg++].NCC([O-])=O.NCC([O-])=O
DB11190	Pantethine	approved	CC(C)(CO)[C@@H](O)C(=O)NCCC(=O)NCCSSCCNC(=O)CCNC(=O)[C@H](O)C(C)(C)CO
DB11197	Ferrous cysteine glycinate	approved	[Fe++].NCC(O)=O.[H][C@](N)(CS)C(O)=O.[H][C@](N)(C[S-])C([O-])=O
DB11200	Aluminum zirconium octachlorohydrex gly	approved	O.O.[Al+3].[Cl-].[Zr+4].NCC([O-])=O
DB11201	Menthyl salicylate	approved	CC(C)[C@@H]1CC[C@@H](C)C[C@H]1OC(=O)C1=CC=CC=C1O
DB11204	Panthenol	approved	CC(C)(CO)C(O)C(=O)NCCCO
DB11205	Alcloxa	approved	[OH-].[OH-].[OH-].[OH-].[Al+3].[Al+3].[Cl-].NC(=O)NC1NC(=O)[N-]C1=O
DB11206	Bemotrizinol	approved	CCCCC(CC)COC1=CC(O)=C(C=C1)C1=NC(=NC(=N1)C1=CC=C(OC)C=C1)C1=C(O)C=C(OCC(CC)CCCC)C=C1
DB11207	Amiloxate	approved	COC1=CC=C(\C=C\C(=O)OCCC(C)C)C=C1
DB11210	Ferrous bisglycinate	approved	[Fe++].NCC([O-])=O.NCC([O-])=O
DB11217	Arbutin	approved	OC[C@H]1O[C@@H](OC2=CC=C(O)C=C2)[C@H](O)[C@@H](O)[C@@H]1O
DB11219	Enzacamene	approved	CC1=CC=C(\C=C2/C3CCC(C)(C2=O)C3(C)C)C=C1
DB11221	Dioxybenzone	approved	COC1=CC(O)=C(C=C1)C(=O)C1=CC=CC=C1O
DB11226	Ethylhexyl methoxycrylene	approved	CCCCC(CC)COC(=O)C(C#N)=C(C1=CC=CC=C1)C1=CC=C(OC)C=C1
DB11231	Lycopene	approved	CC(C)=CCC\C(C)=C\C=C\C(\C)=C\C=C\C(\C)=C\C=C\C=C(/C)\C=C\C=C(/C)\C=C\C=C(/C)CCC=C(C)C
DB11235	Thonzylamine	approved	COC1=CC=C(CN(CCN(C)C)C2=NC=CC=N2)C=C1
DB11239	Aluminum sulfate	approved	[Al+3].[Al+3].[O-]S([O-])(=O)=O.[O-]S([O-])(=O)=O.[O-]S([O-])(=O)=O
DB11246	Copper gluconate	approved	[Cu++].OC[C@@H](O)[C@@H](O)[C@H](O)[C@@H](O)C([O-])=O.OC[C@@H](O)[C@@H](O)[C@H](O)[C@@H](O)C([O-])=O
DB11248	Zinc gluconate	approved	[Zn++].[H][C@@](O)(CO)[C@@]([H])(O)[C@]([H])(O)[C@@]([H])(O)C([O-])=O.[H][C@@](O)(CO)[C@@]([H])(O)[C@]([H])(O)[C@@]([H])(O)C([O-])=O
DB11254	Hexylresorcinol	approved	CCCCCCC1=C(O)C=C(O)C=C1
DB11255	Chromium picolinate	approved	[Cr+3].[O-]C(=O)C1=NC=CC=C1.[O-]C(=O)C1=NC=CC=C1.[O-]C(=O)C1=NC=CC=C1
DB11256	Levomefolic acid	approved	CN1[C@@H](CNC2=CC=C(C=C2)C(=O)N[C@@H](CCC(O)=O)C(O)=O)CNC2=C1C(=O)N=C(N)N2
DB11257	Fluoride ion	approved	[F-]
DB11260	Diacetyl benzoyl lathyrol	approved	C[C@H]1C[C@@]2(OC(C)=O)[C@H]([C@H]1OC(=O)C1=CC=CC=C1)[C@@H](OC(C)=O)C(=C)CC[C@H]1[C@@H](\C=C(C)\C2=O)C1(C)C
DB11262	Bisoctrizole	approved	CC(C)(C)CC(C)(C)C1=CC(CC2=C(O)C(=CC(=C2)C(C)(C)CC(C)(C)C)N2N=C3C=CC=CC3=N2)=C(O)C(=C1)N1N=C2C=CC=CC2=N1
DB11263	Polydatin	approved	OC[C@H]1O[C@@H](OC2=CC(\C=C\C3=CC=C(O)C=C3)=CC(O)=C2)[C@H](O)[C@@H](O)[C@@H]1O
DB11264	Calcium glycerophosphate	approved	[Ca++].OCC(CO)OP([O-])([O-])=O
DB11269	Diethylamino hydroxybenzoyl hexyl benzoate	approved	CCCCCCOC(=O)C1=CC=CC=C1C(=O)C1=CC=C(C=C1O)N(CC)CC
DB11273	Dihydroergocornine	approved	[H][C@@]12CCCN1C(=O)[C@H](C(C)C)N1C(=O)[C@](NC(=O)[C@H]3CN(C)[C@]4([H])CC5=CNC6=CC=CC(=C56)[C@@]4([H])C3)(O[C@@]21O)C(C)C
DB11274	Dihydro-alpha-ergocryptine	approved	[H][C@@]12CCCN1C(=O)[C@H](CC(C)C)N1C(=O)[C@](NC(=O)[C@H]3CN(C)[C@]4([H])CC5=CNC6=CC=CC(=C56)[C@@]4([H])C3)(O[C@@]21O)C(C)C
DB11275	Epicriptine	approved	[H][C@@]12CCCN1C(=O)[C@]([H])([C@H](C)CC)N1C(=O)[C@](NC(=O)[C@H]3CN(C)[C@]4([H])CC5=CNC6=CC=CC(=C56)[C@@]4([H])C3)(O[C@@]21O)C(C)C
DB11278	DL-Methylephedrine	approved	C[C@@H]([C@H](O)C1=CC=CC=C1)N(C)C
DB11279	Brilliant green cation	approved	CCN(CC)C1=CC=C(C=C1)C(C1=CC=CC=C1)=C1C=CC(C=C1)=[N+](CC)CC
DB11282	Diethyltoluamide	approved	CCN(CC)C(=O)C1=CC(C)=CC=C1
DB11283	DL-dimyristoylphosphatidylcholine	approved	CCCCCCCCCCCCCC(=O)OCC(COP([O-])(=O)OCC[N+](C)(C)C)OC(=O)CCCCCCCCCCCCC
DB11284	DL-dimyristoylphosphatidylglycerol	approved	CCCCCCCCCCCCCC(=O)OCC(COP(O)(=O)OCC(O)CO)OC(=O)CCCCCCCCCCCCC
DB11285	Ethyl ferulate	approved	[H]\C(=C(\[H])C1=CC(OC)=C(O)C=C1)C(=O)OCC
DB11299	Vanillyl butyl ether	approved	CCCCOCC1=CC(OC)=C(O)C=C1
DB11315	Methscopolamine	approved	C[N+]1(C)[C@H]2C[C@@H](C[C@@H]1[C@H]1O[C@@H]21)OC(=O)[C@H](CO)C1=CC=CC=C1
DB11323	Glycol salicylate	approved	OCCOC(=O)C1=CC=CC=C1O
DB11326	Boric acid	approved	OB(O)O
DB11327	Dipyrithione	approved	[O-][N+]1=CC=CC=C1SSC1=CC=CC=[N+]1[O-]
DB11328	Tetradecyl hydrogen sulfate (ester)	approved	CCCCC(CC)CCC(CC(C)C)OS(O)(=O)=O
DB11331	1-Palmitoyl-2-oleoyl-sn-glycero-3-(phospho-rac-(1-glycerol))	approved	CCCCCCCCCCCCCCCC(=O)OC[C@H](COP(O)(=O)OCC(O)CO)OC(=O)CCCCCCC\C=C/CCCCCCCC
DB11332	Sinapultide	approved	CC(C)C[C@H](NC(=O)[C@@H](N)CCCCN)C(=O)N[C@@H](CC(C)C)C(=O)N[C@@H](CC(C)C)C(=O)N[C@@H](CC(C)C)C(=O)N[C@@H](CCCCN)C(=O)N[C@@H](CC(C)C)C(=O)N[C@@H](CC(C)C)C(=O)N[C@@H](CC(C)C)C(=O)N[C@@H](CC(C)C)C(=O)N[C@@H](CCCCN)C(=O)N[C@@H](CC(C)C)C(=O)N[C@@H](CC(C)C)C(=O)N[C@@H](CC(C)C)C(=O)N[C@@H](CC(C)C)C(=O)N[C@@H](CCCCN)C(=O)N[C@@H](CC(C)C)C(=O)N[C@@H](CC(C)C)C(=O)N[C@@H](CC(C)C)C(=O)N[C@@H](CC(C)C)C(=O)N[C@…
DB11336	Kinetin	approved	C(NC1=NC=NC2=C1NC=N2)C1=CC=CO1
[truncated: 588 more rows]

## Sheet: (B)Similarity to zanamivir
The chemical similarity of zanamivir and 2585 approved drugs
Drug	T(zanamivir)
Zanamivir	1
Capreomycin	0.686567
Viomycin	0.686567
Hyaluronic acid	0.677966
Streptomycin	0.671875
Azacitidine	0.661538
Dihydrostreptomycin	0.651515
Acarbose	0.644068
Cytarabine	0.641791
Fosdenopterin	0.638889
Sapropterin	0.636364
Amikacin	0.634921
Streptozocin	0.632353
Glucosamine	0.62963
Decitabine	0.617647
N-Acetylglucosamine	0.615385
Leucovorin	0.608108
Levoleucovorin	0.608108
Oseltamivir	0.606557
Peramivir	0.606557
Plazomicin	0.605634
Levomefolic acid	0.605263
Telbivudine	0.6
Riboflavin	0.597222
Folic acid	0.594203
Edoxudine	0.591549
Stavudine	0.590909
Kanamycin	0.590164
Roxadustat	0.587302
Entecavir	0.586667
Inosine pranobex	0.585714
Iopamidol	0.583333
Tobramycin	0.580645
Valganciclovir	0.578947
Gemcitabine	0.577465
Nelarabine	0.575342
Ziconotide	0.575
Regadenoson	0.573333
Framycetin	0.571429
Paromomycin	0.571429
Ribostamycin	0.571429
Icatibant	0.571429
Proxibarbal	0.571429
Brivudine	0.569444
Ganciclovir	0.567568
Iohexol	0.5625
Dibekacin	0.5625
Idoxuridine	0.561644
Floxuridine	0.561644
Vidarabine	0.557143
Adenosine	0.557143
Pemetrexed	0.557143
Netilmicin	0.557143
Gonadorelin	0.556962
Nafarelin	0.556962
Triptorelin	0.556962
Semaglutide	0.555556
Trifluridine	0.554054
Zidovudine	0.552632
Cefoxitin	0.552632
Oteracil	0.551724
Vancomycin	0.551282
Epirubicin	0.550725
Doxorubicin	0.550725
Bortezomib D-mannitol	0.549296
Pralatrexate	0.545455
Iomeprol	0.545455
Bivalirudin	0.544304
Candicidin	0.544118
Iobitridol	0.544118
Leuprolide	0.54321
Capecitabine	0.54321
Histrelin	0.54321
Guanoxan	0.542373
Afamelanotide	0.542169
Zalcitabine	0.541667
Fludarabine	0.540541
Natamycin	0.539683
Etelcalcetide	0.538462
Ioxilan	0.537313
Aminohippuric acid	0.537037
Uridine triacetate	0.536232
Gadopiclenol	0.536232
Tetracosactide	0.535714
Ribavirin	0.535211
Novobiocin	0.535211
Dyphylline	0.534247
Maribavir	0.533333
Cidofovir	0.532468
Pantothenic acid	0.532258
Vasopressin	0.531646
Cefuroxime	0.531646
Flavin mononucleotide	0.530864
Nystatin	0.530303
Amphotericin B	0.530303
Balsalazide	0.530303
Benserazide	0.530303
Piflufolastat F 18	0.530303
Iodixanol	0.529412
Pramlintide	0.529412
Imidurea	0.529412
Methotrexate	0.527778
Polymyxin B	0.527778
Caspofungin	0.525641
Migalastat	0.525424
Oritavancin	0.52439
Flavin adenine dinucleotide	0.523256
Acebutolol	0.521739
Colistin	0.521127
Iotrolan	0.521127
Cedazuridine	0.52
Tigecycline	0.519481
Desmopressin	0.518987
Daptomycin	0.518987
NADH	0.518072
Cetrorelix	0.517647
Buserelin	0.517647
Ganirelix	0.517647
Methocarbamol	0.516667
Atenolol	0.516129
Spectinomycin	0.516129
Floctafenine	0.515152
Diazolidinylurea	0.514706
Paclitaxel	0.514286
Iopromide	0.514286
Celiprolol	0.513889
Micronomicin	0.513889
Dabigatran	0.513514
Pentostatin	0.513158
Bacitracin	0.512821
Asparagine	0.509434
Glutathione	0.508475
Clavulanic acid	0.507937
Practolol	0.507937
Ioxitalamic acid	0.507937
Gentamicin	0.507246
Cefradine	0.507246
Ioversol	0.507246
Cephaloglycin	0.507042
Docetaxel	0.507042
Gallium-68 PSMA	0.507042
Penciclovir	0.506667
Everolimus	0.506667
Plecanatide	0.506667
Mitomycin	0.506494
Acyclovir	0.506494
Valaciclovir	0.506329
Lopinavir	0.506329
Somatostatin	0.506329
Lymecycline	0.506173
Cefixime	0.506024
Midodrine	0.5
Guanadrel	0.5
Bleomycin	0.5
Ertapenem	0.5
Valrubicin	0.5
Fondaparinux	0.5
Labetalol	0.5
Rifabutin	0.5
Clofarabine	0.5
Lamivudine	0.5
Amlexanox	0.5
Cefadroxil	0.5
Cefprozil	0.5
Ceftibuten	0.5
Gluconolactone	0.5
Temsirolimus	0.5
Cabazitaxel	0.5
Carglumic acid	0.5
Dexpanthenol	0.5
Panthenol	0.5
Indium In-111 pentetreotide	0.5
Terizidone	0.5
Netarsudil	0.5
Gallium Ga-68 gozetotide	0.5
Brincidofovir	0.494118
Pentetreotide	0.493827
Adenosine phosphate	0.493671
Cladribine	0.493506
Mifamurtide	0.493333
Xamoterol	0.493151
Romidepsin	0.492958
Cephalexin	0.492754
Betiatide	0.491525
Goserelin	0.488889
Ademetionine	0.487805
Raltegravir	0.487805
Copanlisib	0.487805
Anidulafungin	0.4875
Emtricitabine	0.487179
Cabotegravir	0.487179
Aliskiren	0.486842
Omadacycline	0.486842
Cefalotin	0.486486
Tacrolimus	0.486486
Sirolimus	0.486486
Deflazacort	0.486486
Cyclosporine	0.486111
Idarubicin	0.485294
Rifamycin	0.485294
Pemoline	0.483333
Allantoin	0.483333
Calcium glubionate anhydrous	0.483333
Degarelix	0.482759
Tilarginine	0.482759
Ascorbic acid	0.482143
Gaxilose	0.482143
Lactitol	0.482143
Niacinamide ascorbate	0.482143
Ferrous ascorbate	0.482143
Acetylcysteine	0.481481
Linaclotide	0.481481
Dolutegravir	0.481013
Rifaximin	0.480519
Setmelanotide	0.480519
Didanosine	0.48
Voclosporin	0.479452
Citicoline	0.477778
Lisinopril	0.477612
Cycloserine	0.476923
Cefotaxime	0.47619
Ergotamine	0.47619
Lacosamide	0.47619
Ceftizoxime	0.475
Ximelagatran	0.474359
Lanreotide	0.474359
Telavancin	0.473684
Olodaterol	0.473684
Cyanocobalamin Co-57	0.473684
Cyanocobalamin Co-60	0.473684
N-acetyltyrosine	0.473684
Phenoxymethylpenicillin	0.472973
Serdexmethylphenidate	0.472973
Felbamate	0.472727
Eribulin	0.472222
Doxycycline	0.471429
Chloramphenicol	0.471429
Oxytetracycline	0.471429
Daunorubicin	0.471429
Metacycline	0.471429
Pantethine	0.471429
Ponesimod	0.470588
Edotreotide gallium Ga-68	0.470588
Dotatate	0.46988
Enalaprilat	0.469697
Cefdinir	0.469136
Butalbital	0.46875
Bimatoprost	0.46875
Metipranolol	0.46875
Mecobalamin	0.46875
Pentagastrin	0.468354
Testosterone enantate benzilic acid hydrazone	0.468354
Sinapultide	0.467742
Chlorphenesin carbamate	0.467742
Cefapirin	0.467532
Saquinavir	0.467532
Pasireotide	0.467532
Bictegravir	0.467532
Imipenem	0.466667
Tetracycline	0.465753
Minocycline	0.465753
Spiramycin	0.465753
Tetracycline phosphate complex	0.465753
Lutetium Lu-177 vipivotide tetraxetan	0.465753
Creatine	0.465517
Ferric derisomaltose	0.465517
Dactinomycin	0.465116
Cefpodoxime	0.465116
Cefaclor	0.464789
Ioxaglic acid	0.464789
Dotatate gallium Ga-68	0.464286
Lutetium Lu 177 dotatate	0.464286
Sodium ascorbate	0.464286
Calcium ascorbate	0.464286
Magnesium ascorbate	0.464286
Zinc ascorbate	0.464286
Copper oxodotreotide Cu-64	0.464286
Indacaterol	0.463768
Atosiban	0.463415
Alatrofloxacin	0.463415
Ritonavir	0.4625
Aspartic acid	0.461538
Pimecrolimus	0.461538
D-Serine	0.461538
Technetium Tc-99m disofenin	0.461538
Boceprevir	0.460526
Amiloride	0.460317
Phenobarbital	0.460317
Rutin	0.460317
Glutathione disulfide	0.460317
Sofosbuvir	0.45977
Eravacycline	0.45977
Difelikefalin	0.459459
Samidorphan	0.459459
Vibegron	0.459459
Cyanocobalamin	0.459184
Alcloxa	0.459016
Esculin	0.459016
Bucetin	0.459016
Lenvatinib	0.458333
Dihydroergotamine	0.457831
Tezacaftor	0.457831
Polydatin	0.457627
Loracarbef	0.457143
Fosaprepitant	0.456522
Meglumine	0.45614
Cilastatin	0.455882
Atazanavir	0.455696
Carfilzomib	0.455696
Lypressin	0.455696
Ceftazidime	0.455556
L-Glutamine	0.454545
Phenacemide	0.454545
Rifapentine	0.454545
Doripenem	0.454545
Eliglustat	0.454545
Ceftobiprole medocaril	0.454545
Alfuzosin	0.453488
Elagolix	0.453488
Demeclocycline	0.453333
Bacampicillin	0.453333
Gabapentin enacarbil	0.453125
Topotecan	0.452381
Cefditoren	0.452381
Lumacaftor	0.452055
Vaborbactam	0.452055
Azlocillin	0.45122
Gramicidin D	0.450704
Flecainide	0.450704
Lodoxamide	0.45
Rifampicin	0.449438
Remdesivir	0.449438
Lincomycin	0.448718
Alvimopan	0.448718
Tipiracil	0.448718
Abarelix	0.448276
Lactose	0.448276
Arbutin	0.448276
alpha-Arbutin	0.448276
Talbutal	0.447761
Miglitol	0.447761
Rebamipide	0.447761
Rolitetracycline	0.447059
Azilsartan medoxomil	0.447059
Dihydro-alpha-ergocryptine	0.447059
Epicriptine	0.447059
Dihydroergocristine	0.447059
Tiopronin	0.446429
Metaxalone	0.446154
Primidone	0.446154
Diosmin	0.446154
Carteolol	0.445946
Benazepril	0.445946
Dabigatran etexilate	0.445783
Latamoxef	0.445652
Raltitrexed	0.444444
Doxazosin	0.444444
Uracil mustard	0.444444
Oxprenolol	0.444444
Fostamatinib	0.444444
Tazemetostat	0.444444
Naftazone	0.444444
Cangrelor	0.443299
Fursultiamine	0.443038
Ramipril	0.442857
Miglustat	0.442857
Procaine merethoxylline	0.442857
Ixazomib	0.442857
Lactulose	0.442623
Ceftolozane	0.442308
Aprepitant	0.44186
Meropenem	0.441558
Chlortetracycline	0.441558
Mupirocin	0.441176
Pirbuterol	0.441176
Technetium Tc-99m mebrofenin	0.441176
Mebrofenin	0.441176
Guanfacine	0.440678
Tannic acid	0.440678
Dihydroergocornine	0.440476
Sarecycline	0.440476
Azithromycin	0.44
Cinoxacin	0.44
Cilazapril	0.44
Pivampicillin	0.44
Gadobutrol	0.44
Chloramphenicol succinate	0.44
Bromocriptine	0.43956
Ceftriaxone	0.43956
Cefotetan	0.43956
Esmolol	0.439394
Carbidopa	0.439394
Ezogabine	0.439394
Nepafenac	0.438596
Erythromycin	0.438356
Oxaliplatin	0.438356
Quinapril	0.438356
Vindesine	0.438202
Quinupristin	0.438202
Naldemedine	0.438202
Mebendazole	0.4375
Carboxin	0.4375
Lurbinectedin	0.436782
Trandolapril	0.43662
Enalapril	0.43662
Perindopril	0.43662
Solriamfetol	0.436364
Argatroban	0.43617
Ranolazine	0.435897
Moexipril	0.435897
Nitrofurantoin	0.435897
Telaprevir	0.435897
Revefenacin	0.435897
Fluorouracil	0.435484
Bortezomib	0.434783
Secobarbital	0.434783
Mitoxantrone	0.434783
Ivacaftor	0.434783
Roxithromycin	0.433735
Teriflunomide	0.433333
Butabarbital	0.432836
Formoterol	0.432836
Arformoterol	0.432836
Macimorelin	0.432836
Indinavir	0.432099
Clindamycin	0.432099
Ceftobiprole	0.431579
Levodopa	0.431034
Erdosteine	0.430769
Nitrofural	0.430556
Benzylpenicillin	0.430556
Amoxicillin	0.430556
Procaine benzylpenicillin	0.430556
Chloramphenicol palmitate	0.43038
Trabectedin	0.430233
Cefmetazole	0.430108
Sorafenib	0.428571
Cefpiramide	0.428571
Droxidopa	0.428571
Regorafenib	0.428571
Finafloxacin	0.428571
Xanthinol	0.428571
Eluxadoline	0.428571
Gilteritinib	0.428571
Apronalide	0.428571
1,2-icosapentoyl-sn-glycero-3-phosphoserine	0.428571
Cefiderocol	0.427184
Irinotecan	0.426966
Cefamandole	0.426966
Tedizolid phosphate	0.426966
Carbetocin	0.426829
Ozanimod	0.426829
Linzagolix	0.426829
Biotin	0.426471
Clorazepic acid	0.426471
Colchiceine	0.426471
Methyldopa	0.42623
Sucrose	0.42623
Iron sucrose	0.42623
Sodium ferric gluconate complex	0.42623
Pafolacianine	0.425926
Cefazolin	0.425287
Atorvastatin	0.425
Bicalutamide	0.425
Dantrolene	0.425
Ouabain	0.424658
Clarithromycin	0.424658
Mirabegron	0.424658
Procaterol	0.424242
Enoximone	0.424242
Iocetamic acid	0.424242
Fructose	0.423729
Gimeracil	0.423729
Chlormerodrin Hg-197	0.423729
Avanafil	0.423529
Cobicistat	0.423529
Nafcillin	0.423077
Calcium threonate	0.423077
Gluconic Acid	0.423077
Ampicillin	0.422535
Carbenicillin	0.422535
Trimetrexate	0.422535
Protirelin	0.422535
Salbutamol	0.421875
Sacubitril	0.421875
Levosalbutamol	0.421875
Terazosin	0.421687
Tedizolid	0.421687
Amlodipine	0.421053
Cyclacillin	0.421053
Eltrombopag	0.421053
Levamlodipine	0.421053
Piperacillin	0.420455
Isocarboxazid	0.42029
Butobarbital	0.42029
Protokylol	0.42029
Undecoylium chloride iodine complex	0.42029
Micafungin	0.42
Linezolid	0.419753
Cefmenoxime	0.419355
Cromoglicic acid	0.419355
Aceclofenac	0.419355
Alloin	0.419355
Deslanoside	0.418919
Fidaxomicin	0.418919
Tegafur	0.418919
Tegafur-uracil	0.418919
Lusutrombopag	0.418605
Mobocertinib	0.418605
Troglitazone	0.417722
Fosphenytoin	0.417722
Moxidectin	0.417722
Ceforanide	0.417582
Diatrizoate	0.416667
Bromfenac	0.416667
Pioglitazone	0.416667
Silodosin	0.416667
Pomalidomide	0.416667
Articaine	0.416667
Aurothioglucose	0.416667
Velpatasvir	0.416667
Telotristat ethyl	0.416667
Moxonidine	0.415584
Hesperidin	0.415385
Iodipamide	0.415385
Calcium glucoheptonate	0.415094
Calcium gluconate	0.415094
Manganese gluconate	0.415094
Copper gluconate	0.415094
Zinc gluconate	0.415094
Potassium gluconate	0.415094
Magnesium gluconate	0.415094
Ferrous gluconate	0.415094
Chromium gluconate	0.415094
Pentobarbital	0.414286
Zoledronic acid	0.414286
Amobarbital	0.414286
Nialamide	0.414286
Enasidenib	0.414286
Zoledronate D,L-Lysine Monohydrate	0.414286
Telithromycin	0.413793
Temocillin	0.413333
Sugammadex	0.412698
Entacapone	0.4125
Repaglinide	0.4125
Elbasvir	0.4125
Trimethoprim	0.411765
Benfotiamine	0.411765
Bumadizone	0.411765
Cefamandole nafate	0.411111
Vildagliptin	0.410959
Steviolbioside	0.410959
Finerenone	0.410959
Carbocisteine	0.410714
Tafenoquine	0.410256
Cisapride	0.409639
Rivaroxaban	0.409639
Dipivefrin	0.409091
Acetarsol	0.409091
Ceruletide	0.408602
Cefpirome	0.408602
Lapyrium	0.408451
Oftasceine	0.408451
Midostaurin	0.407895
Palbociclib	0.407407
Doravirine	0.406977
Orciprenaline	0.40678
Lisdexamfetamine	0.40678
Phenytoin	0.40625
Flucytosine	0.40625
Favipiravir	0.40625
Pyridoxal phosphate	0.405797
Abacavir	0.405797
Nadolol	0.405797
Capsaicin	0.405797
Zucapsaicin	0.405797
Mavacamten	0.405797
Nedocromil	0.405405
Carvedilol	0.405405
Cabozantinib	0.405405
Nicorandil	0.405405
Lefamulin	0.405405
Pheneticillin	0.405405
Melphalan flufenamide	0.405405
Moricizine	0.405063
Tadalafil	0.405063
Nintedanib	0.404762
Binimetinib	0.404762
Baloxavir marboxil	0.404255
D-glucose	0.403846
Xylose	0.403846
Galactose	0.403846
Norepinephrine	0.403509
Pyridoxine	0.403226
Chlormerodrin	0.403226
Fenoterol	0.403226
Fluorodopa (18F)	0.403226
Bisoprolol	0.402985
Ethotoin	0.402985
Pindolol	0.402985
Nedaplatin	0.402985
Ticarcillin	0.402778
Ergometrine	0.402597
Spirapril	0.402597
Rolapitant	0.402597
Delafloxacin	0.402439
Piroxicam	0.402299
Timolol	0.402174
Colistimethate	0.402174
Gemifloxacin	0.402174
Sincalide	0.402174
Glutamic acid	0.4
Pamidronic acid	0.4
Dexrazoxane	0.4
Isoprenaline	0.4
Cefoperazone	0.4
Pidolic acid	0.4
Tromethamine	0.4
Ixabepilone	0.4
Alogliptin	0.4
Iothalamic acid	0.4
Selumetinib	0.4
Istradefylline	0.4
Nelfinavir	0.39759
Prazosin	0.39759
Furosemide	0.39759
Methylergometrine	0.397436
Vorapaxar	0.397436
Digoxin	0.39726
Thiamylal	0.39726
Aminoglutethimide	0.397059
Propylthiouracil	0.397059
Scopolamine	0.397059
Colchicine	0.397059
Saxagliptin	0.397059
Nateglinide	0.396825
Mebutamate	0.396825
Cystine	0.396552
Cysteine	0.396226
Ferrous cysteine glycinate	0.396226
Ceftaroline fosamil	0.39604
Isoxicam	0.395604
Moxifloxacin	0.395349
Pibrentasvir	0.395349
Enprofylline	0.394737
Meticillin	0.394737
Belumosudil	0.394737
Cerivastatin	0.394366
Propafenone	0.394366
Gadobenic acid	0.393939
5-O-phosphono-alpha-D-ribofuranosyl diphosphate	0.393939
Safinamide	0.393939
Lacidipine	0.393939
Tyropanoic acid	0.393939
Amrinone	0.393443
Tenoxicam	0.393258
Vincristine	0.393258
Tyrosine	0.392857
Enoxacin	0.392857
Aminolevulinic acid	0.392857
Prucalopride	0.392857
Salicylamide	0.392857
Letermovir	0.392857
Methysergide	0.392405
PBT-434	0.392405
Threonine	0.392157
Cefotiam	0.391753
Cefepime	0.391753
Gadoversetamide	0.391304
Prednisone	0.391304
Hydrocortisone	0.391304
Prednisolone	0.391304
Ibrexafungerp	0.391304
Glipizide	0.390805
Afatinib	0.390805
Meprobamate	0.390625
Propranolol	0.390625
Methyprylon	0.390625
Rosiglitazone	0.390244
Norfloxacin	0.390244
Metyrosine	0.389831
Guaifenesin	0.389831
Iodohippurate sodium I-131	0.389831
Iodohippurate sodium I-123	0.389831
Noxytiolin	0.389831
Bosentan	0.389474
Amprenavir	0.389474
Meloxicam	0.388889
Troleandomycin	0.388889
Ketoconazole	0.388235
Oxtriphylline	0.388235
Levoketoconazole	0.388235
Betaxolol	0.38806
Metoprolol	0.38806
Ingenol mebutate	0.38806
Dapagliflozin	0.38806
Levobetaxolol	0.38806
Isavuconazonium	0.387755
Terbutaline	0.387097
Itraconazole	0.387097
Olsalazine	0.387097
Famciclovir	0.386667
Lenalidomide	0.386667
Tolvaptan	0.386667
Sultamicillin	0.386364
Aminosalicylic acid	0.385965
Methylprednisolone	0.385714
Thalidomide	0.385714
Levobunolol	0.385714
Bezafibrate	0.385714
Nebivolol	0.385714
Sodium stibogluconate	0.385714
Methylprednisone	0.385714
Molsidomine	0.385542
Alendronic acid	0.384615
Ketazolam	0.384615
Idebenone	0.384615
Bisoxatin	0.384615
Carindacillin	0.384615
Dasatinib	0.383721
Acetyldigitoxin	0.383562
Triamcinolone	0.383562
Budesonide	0.383562
Desonide	0.383562
Digitoxin	0.383562
Epinephrine	0.383333
Posaconazole	0.382979
Dalfopristin	0.382979
Ubrogepant	0.382716
Salmeterol	0.382353
Orlistat	0.382353
Tasimelteon	0.382353
Rosuvastatin	0.382022
Fludeoxyglucose (18F)	0.381818
Betrixaban	0.381579
Risedronic acid	0.380952
Oxaprozin	0.380952
Oxitriptan	0.380952
Omacetaxine mepesuccinate	0.380952
Mangafodipir	0.380952
Fusafungine	0.380952
Bicisate	0.380952
Glecaprevir	0.380952
Fostemsavir	0.380435
Methohexital	0.380282
Nalidixic acid	0.380282
Benznidazole	0.379747
Phenformin	0.37931
Ticagrelor	0.378947
Paritaprevir	0.378947
Carisoprodol	0.378788
Pixantrone	0.378788
Thiopental	0.378378
Trimethobenzamide	0.378378
Nimodipine	0.378049
Sparfloxacin	0.378049
Atogepant	0.378049
Paliperidone	0.377778
Tenofovir alafenamide	0.377778
Darunavir	0.377551
Fosamprenavir	0.377551
Phenylalanine	0.377358
Mannitol	0.377358
Sorbitol	0.377358
Dicoumarol	0.377049
Benorilate	0.377049
Travoprost	0.376812
Levosimendan	0.376812
Carboplatin	0.376812
Bufexamac	0.376812
Diroximel fumarate	0.376812
Hetacillin	0.376623
Tenofovir disoproxil	0.376471
Lornoxicam	0.376344
Grazoprevir	0.376238
Ornithine	0.375
Diflorasone	0.375
Alclometasone	0.375
Liothyronine	0.375
Levothyroxine	0.375
Dextrothyroxine	0.375
Albendazole	0.375
Flumethasone	0.375
Etodolac	0.375
Tirofiban	0.375
Bumetanide	0.375
Mycophenolic acid	0.375
Gatifloxacin	0.375
Tocainide	0.375
Cefonicid	0.375
Vilanterol	0.375
Elvitegravir	0.375
Hydroxyethyl cellulose	0.375
Tivozanib	0.375
Entrectinib	0.375
Darolutamide	0.375
Glycyrrhizic acid	0.375
Pemigatinib	0.373626
Oxacillin	0.373494
Besifloxacin	0.373494
Tucatinib	0.373494
Flunisolide	0.373333
Anagrelide	0.373333
Fluocinolone acetonide	0.373333
Ivermectin	0.373333
Dipyridamole	0.373333
Tirbanibulin	0.373333
Ozenoxacin	0.373333
Gadodiamide	0.373134
Felodipine	0.373134
Mephenesin	0.372881
Macitentan	0.37234
Lomefloxacin	0.372093
Osimertinib	0.372093
Hydrocortamate	0.371795
Daclatasvir	0.371795
Paramethadione	0.371429
Methylphenobarbital	0.371429
Penbutolol	0.371429
Plicamycin	0.371429
Gadoxetic acid	0.371429
Canagliflozin	0.371429
Viloxazine	0.371429
Meprednisone	0.371429
Hydrocortisone cypionate	0.371429
Hydrocortisone succinate	0.371429
Warfarin	0.370968
Vinblastine	0.370787
Ciprofloxacin	0.37037
Trovafloxacin	0.37037
Citric acid	0.37037
Ferric ammonium citrate	0.37037
Nirmatrelvir	0.37037
Isradipine	0.369863
Fludrocortisone	0.369863
Clevidipine	0.369863
Fluprednisolone	0.369863
Ertugliflozin	0.369863
Prilocaine	0.369231
Tropicamide	0.369231
Clenbuterol	0.369231
Pitavastatin	0.369231
Fingolimod	0.369231
Metrizoic acid	0.369231
Sulfasalazine	0.369048
Lysine	0.368421
Mesalazine	0.368421
Nitrendipine	0.368421
Acenocoumarol	0.368421
Spinosad	0.368421
Bendazac	0.368421
Acemetacin	0.368421
Linagliptin	0.367816
Opicapone	0.367816
Lorazepam	0.367647
Oxazepam	0.367647
Eslicarbazepine acetate	0.367647
Ombitasvir	0.367089
Tryptophan	0.366667
Phenyl aminosalicylate	0.366667
Glycol salicylate	0.366667
Cianidanol	0.366667
Mephenytoin	0.366197
Rosoxacin	0.366197
Roflumilast	0.366197
Etravirine	0.366197
Hydrocortisone acetate	0.366197
Methylprednisolone hemisuccinate	0.366197
Prednisolone acetate	0.366197
Nitazoxanide	0.365854
Deucravacitinib	0.365854
Sitaxentan	0.365591
Glycine	0.365385
Glycerin	0.365385
Betamethasone	0.364865
Methscopolamine bromide	0.364865
Dexamethasone	0.364865
Methscopolamine	0.364865
Olutasidenib	0.364865
Grepafloxacin	0.364706
Levofloxacin	0.364706
Ofloxacin	0.364706
Pivmecillinam	0.364706
Aripiprazole lauroxil	0.364706
Tipranavir	0.364583
Oxyphencyclimine	0.363636
Flurandrenolide	0.363636
Vorinostat	0.363636
Lemborexant	0.363636
Rimegepant	0.363636
Asciminib	0.363636
Eslicarbazepine	0.363636
Pentoxifylline	0.3625
Rescinnamine	0.3625
Captopril	0.362319
Ledipasvir	0.361446
Deferoxamine	0.361111
Moclobemide	0.361111
Hydrocortisone butyrate	0.361111
Hydrocortisone valerate	0.361111
Prednisolone tebutate	0.361111
Carbocromen	0.36
Etacrynic acid	0.359375
Kinetin	0.359375
Rilmenidine	0.359375
Asunaprevir	0.359223
Nisoldipine	0.358974
Lifitegrast	0.358696
Potassium aspartate	0.358491
Odevixibat	0.358491
Benzonatate	0.358209
Ramelteon	0.358209
Lubiprostone	0.358209
Arbutamine	0.358209
Sonidegib	0.358025
Vericiguat	0.358025
Aztreonam	0.357895
Bethanidine	0.357143
Rocuronium	0.357143
Cobimetinib	0.357143
Levonordefrin	0.357143
Tixocortol	0.357143
Florbetapir (18F)	0.357143
Tritoqualine	0.357143
Tepotinib	0.357143
Dicloxacillin	0.356322
Cloxacillin	0.356322
Manidipine	0.356322
Zanubrutinib	0.356322
Paramethasone acetate	0.356164
Vinorelbine	0.355556
Temozolomide	0.355263
Flavoxate	0.355263
Yohimbine	0.355263
Oxyphenbutazone	0.355263
Vilazodone	0.355263
Niclosamide	0.355263
Latanoprostene bunod	0.355263
Isoetharine	0.354839
Hexylcaine	0.354839
Glyburide	0.354839
Udenafil	0.354545
Metoclopramide	0.35443
Cenobamate	0.35443
Selexipag	0.354167
Epoprostenol	0.353846
Oxamniquine	0.353659
Trimethadione	0.352941
Apraclonidine	0.352941
Huperzine A	0.352941
Ambrisentan	0.352941
Apixaban	0.352941
Avatrombopag	0.352941
Flucloxacillin	0.352273
Adefovir dipivoxil	0.352273
Candesartan cilexetil	0.352273
Taurocholic acid	0.352273
Tauroursodeoxycholic acid	0.352273
Reboxetine	0.352113
Theophylline	0.352113
Aminophylline	0.352113
Cortisone acetate	0.352113
Drotaverine	0.352113
1-Palmitoyl-2-oleoyl-sn-glycero-3-(phospho-rac-(1-glycerol))	0.352113
Prednisone acetate	0.352113
Urethane	0.351852
Voxilaprevir	0.351852
Phentolamine	0.351351
Lomustine	0.351351
Propoxycaine	0.351351
Acalabrutinib	0.351351
Muzolimine	0.351351
Iobenguane sulfate I-123	0.350877
Sotalol	0.350649
Eprosartan	0.350649
Remifentanil	0.350649
Ifosfamide	0.350649
Nilvadipine	0.350649
Idelalisib	0.350649
Relebactam	0.350515
Venetoclax	0.350427
Reserpine	0.35
Ripretinib	0.35
Mycophenolate mofetil	0.349398
Trametinib	0.349398
Unoprostone	0.349206
Nicardipine	0.348837
Tolmetin	0.348485
Melphalan	0.348485
Alfentanil	0.348315
Cocarboxylase	0.348315
Pravastatin	0.347826
Lovastatin	0.347826
Levetiracetam	0.347826
Tafluprost	0.347826
Edoxaban	0.347826
Tolcapone	0.347222
Ezetimibe	0.347222
Fluvastatin	0.347222
Propyliodone	0.347222
Tecovirimat	0.347222
Glimepiride	0.346939
Relugolix	0.346939
Erlotinib	0.346667
Ciclesonide	0.346667
Fluclorolone acetonide	0.346667
Oxetacaine	0.346667
Dexamethasone acetate	0.346667
Naloxone	0.346154
Hydrocortisone phosphate	0.346154
Prednisolone phosphate	0.346154
Topiramate	0.345679
Fosinopril	0.345679
Aripiprazole	0.345679
Neratinib	0.345238
Alpelisib	0.345238
Baclofen	0.344828
Sotorasib	0.344444
Eflornithine	0.344262
Deferiprone	0.344262
Padeliporfin	0.344086
Latanoprost	0.34375
Pentamidine	0.34375
Procarbazine	0.34375
Hexamidine	0.34375
Amisulpride	0.34375
Gliquidone	0.343434
Glutethimide	0.343284
Iopodic acid	0.343284
Diloxanide furoate	0.343284
Carbimazole	0.342857
Verteporfin	0.342466
Empagliflozin	0.342466
Zofenopril	0.342466
Loteprednol	0.342466
Cyclophosphamide	0.342105
Fluocinonide	0.342105
Valbenazine	0.342105
Naloxegol	0.341463
Valsartan	0.341176
Sulfacytine	0.340909
Sulfadoxine	0.340909
Larotrectinib	0.340909
Avibactam	0.340659
Acetaminophen	0.339286
Pyrazinamide	0.339286
Phenylephrine	0.338983
Gabapentin	0.338983
Hydroxyurea	0.338983
Hydroxystilbamidine	0.338983
Lumiracoxib	0.33871
Isoxsuprine	0.33871
Liotrix	0.338462
Clonidine	0.338235
Dobutamine	0.338235
Ambroxol	0.338235
Etoposide	0.338028
Melatonin	0.338028
Brivaracetam	0.338028
Artesunate	0.338028
DL-dimyristoylphosphatidylglycerol	0.338028
Sodium 1,2-Dipalmitoyl-sn-glycero-3-phospho-(1'-rac-glycerol)	0.338028
Pentosan polysulfate	0.337838
Conivaptan	0.337838
Prednicarbate	0.337838
Amcinonide	0.337662
Zolmitriptan	0.337662
Buspirone	0.337662
Imatinib	0.337662
Naltrexone	0.337662
Vernakalant	0.337662
Panobinostat	0.337662
Lomitapide	0.337662
Avacopan	0.337662
Deserpidine	0.3375
Olaparib	0.3375
Trifarotene	0.3375
Mivacurium	0.337349
Riociguat	0.337349
Nefazodone	0.337079
Vinflunine	0.336957
Encorafenib	0.336735
Mezlocillin	0.336634
Methionine	0.333333
Caffeine	0.333333
Pregabalin	0.333333
Cabergoline	0.333333
Lidocaine	0.333333
Etomidate	0.333333
Indomethacin	0.333333
Ethambutol	0.333333
Acetohexamide	0.333333
Teniposide	0.333333
Lercanidipine	0.333333
Diclofenac	0.333333
Simvastatin	0.333333
Nilutamide	0.333333
Methoxamine	0.333333
Alprostadil	0.333333
Mefenamic acid	0.333333
Ranitidine	0.333333
Dinoprostone	0.333333
Oxymetazoline	0.333333
Methyl aminolevulinate	0.333333
Primaquine	0.333333
Leflunomide	0.333333
Ambenonium	0.333333
Dutasteride	0.333333
Dinoprost tromethamine	0.333333
Cilostazol	0.333333
Flumazenil	0.333333
D-Methionine	0.333333
Glycolic acid	0.333333
Ataluren	0.333333
Pretomanid	0.333333
Apremilast	0.333333
Hexaminolevulinate	0.333333
Iobenguane	0.333333
Inositol nicotinate	0.333333
Fluocortolone	0.333333
Difluocortolone	0.333333
Piracetam	0.333333
Selenomethionine Se-75	0.333333
Selenomethionine	0.333333
Ribociclib	0.333333
Diaminopropanol tetraacetic acid	0.333333
Clascoterone	0.333333
Dinoprost	0.333333
Racemethionine	0.333333
Bromotheophylline	0.333333
Hydrocortisone probutate	0.333333
Methylprednisolone aceponate	0.333333
Umbralisib	0.333333
Ferric maltol	0.333333
Ceritinib	0.33
Tamsulosin	0.329787
Metamizole	0.329787
Fosnetupitant	0.329787
Glymidine	0.32967
Eszopiclone	0.329545
Zopiclone	0.329545
Pefloxacin	0.329412
Sunitinib	0.329412
Parecoxib	0.329412
Dacomitinib	0.329412
Butylscopolamine	0.329268
Thiamine	0.329114
Lisuride	0.329114
Tegaserod	0.329114
Molindone	0.329114
Nalmefene	0.329114
Sodium feredetate	0.329114
Nifedipine	0.328947
Diethylamino hydroxybenzoyl hexyl benzoate	0.328947
Hexobendine	0.328947
Voxelotor	0.328947
Carmustine	0.328767
Brimonidine	0.328767
Clocortolone	0.328767
Dacarbazine	0.328767
Gadoteridol	0.328571
Zileuton	0.328571
Tetracaine	0.328571
Sotagliflozin	0.328571
Tioguanine	0.328358
Ethosuximide	0.328125
Phenmetrazine	0.328125
Ritodrine	0.328125
Chlorphenesin	0.327869
Dopamine	0.327869
Iopanoic acid	0.327869
Etilefrine	0.327869
Curcumin	0.327869
Vigabatrin	0.327273
Benzocaine	0.327273
Simeprevir	0.327103
Tenapanor	0.326733
Sulpiride	0.326531
Omidenepag isopropyl	0.326316
Selpercatinib	0.326087
Tolazamide	0.325843
Quinethazone	0.325843
Infigratinib	0.325843
Sulfametopyrazine	0.325581
Remoxipride	0.325301
Methazolamide	0.325301
Tolbutamide	0.325301
Doxacurium	0.325301
Methylnaltrexone	0.325301
Betamethasone phosphate	0.325301
Oxymorphone	0.325
Quetiapine	0.325
Pacritinib	0.325
Sucralfate	0.324675
Cetirizine	0.324324
Desoximetasone	0.324324
Levocetirizine	0.324324
Pramiracetam	0.324324
Trilostane	0.323944
Finasteride	0.323944
Chlorhexidine	0.323529
Procainamide	0.323529
Oxyphenisatin acetate	0.323529
Phenprocoumon	0.322581
Edetic acid	0.322581
Dasabuvir	0.322581
Sodium glycerophosphate	0.322581
Butamben	0.322034
Mizolastine	0.321839
Torasemide	0.321429
Gefitinib	0.321429
Droperidol	0.321429
gamma-Aminobutyric acid	0.321429
Phthalylsulfathiazole	0.321429
Brexpiprazole	0.320988
Ivosidenib	0.320988
Cinchocaine	0.320513
Nalbuphine	0.320513
Halcinonide	0.320513
Proparacaine	0.32
Pemirolast	0.32
Oxybuprocaine	0.32
Hyoscyamine	0.319444
Atropine	0.319444
Fexofenadine	0.319444
Auranofin	0.319444
Nilotinib	0.319444
Mefloquine	0.318841
Treprostinil	0.318841
Canrenoic acid	0.318841
Pralsetinib	0.318681
Carboprost tromethamine	0.318182
Modafinil	0.318182
Oxcarbazepine	0.318182
Armodafinil	0.318182
Diltiazem	0.317647
Chlorpropamide	0.317647
Trypan blue free acid	0.317647
Acetyl sulfisoxazole	0.317647
Milrinone	0.31746
Methylphenidate	0.31746
Dexmethylphenidate	0.31746
Pentetic acid	0.31746
Edetate disodium anhydrous	0.31746
Cisatracurium	0.317073
Atracurium besylate	0.317073
Berotralstat	0.317073
Meclofenamic acid	0.316667
Flufenamic acid	0.316667
Tolfenamic acid	0.316667
Ethyl ferulate	0.316667
Fluciclovine (18F)	0.316667
Paroxetine	0.316456
Minaprine	0.316456
Antrafenine	0.316456
Nitrazepam	0.316456
Lasmiditan	0.316456
Lapatinib	0.316327
Tranexamic acid	0.315789
Beclomethasone dipropionate	0.315789
Difluprednate	0.315789
Bemotrizinol	0.315789
Nifurtimox	0.315789
Duvelisib	0.315789
Sultopride	0.315789
Lidoflazine	0.315789
Terconazole	0.315217
Vemurafenib	0.315217
Temazepam	0.315068
Cimetidine	0.315068
Ulobetasol	0.315068
Olopatadine	0.315068
Lofexidine	0.315068
Tromantadine	0.315068
Lormetazepam	0.315068
Sildenafil	0.314815
Dolasetron	0.314286
Edaravone	0.314286
Pantoprazole	0.313953
Famotidine	0.313953
Risdiplam	0.313953
Indecainide	0.313433
Bethanechol	0.313433
Rose bengal I-131	0.313433
Rose bengal	0.313433
Dopexamine	0.313433
Metronidazole	0.313253
Clonazepam	0.313253
Rapacuronium	0.313253
Delamanid	0.313131
Pirenzepine	0.3125
Gadopentetic acid	0.3125
Loperamide	0.3125
Indium In-111 pentetate	0.3125
Pipradrol	0.3125
Secnidazole	0.3125
Vardenafil	0.311927
Adagrasib	0.311828
Doxapram	0.311688
Acamprosate	0.311688
Ibandronate	0.311688
Loteprednol etabonate	0.311688
Acetophenazine	0.311688
Ajmaline	0.311688
Bepotastine	0.311688
Trimetazidine	0.311688
Mometasone furoate	0.311688
Ropivacaine	0.310811
Bupivacaine	0.310811
Montelukast	0.310811
Levobupivacaine	0.310811
Chlorthalidone	0.310345
Aminocaproic acid	0.310345
Futibatinib	0.310345
Brinzolamide	0.31
Bromazepam	0.309859
Fusidic acid	0.309859
alpha-Tocopherol succinate	0.309859
Sulfisoxazole	0.309524
Pimavanserin	0.309524
Metaraminol	0.309091
Nicotinamide	0.309091
Butylene glycol	0.309091
Oxandrolone	0.308824
Procaine	0.308824
Gadoteric acid	0.308824
Noscapine	0.308642
Pholcodine	0.308642
Talazoparib	0.308642
Glasdegib	0.308642
Phenylpropanolamine	0.307692
Voriconazole	0.307692
Iloprost	0.307692
Gliclazide	0.307692
Encainide	0.307692
Propylene glycol	0.307692
Benoxaprofen	0.307692
Cariprazine	0.307692
Gadofosveset trisodium	0.307692
Fluticasone furoate	0.307692
Niraparib	0.307692
Selinexor	0.307692
Metergoline	0.307692
Calcium saccharate	0.307692
Patent Blue	0.307692
Magnesium malate	0.307692
Sulfadimethoxine	0.306818
Lorlatinib	0.306818
Fluvoxamine	0.306667
Phenylbutazone	0.306667
Clobetasol	0.306667
Fluticasone	0.306667
Triamterene	0.306452
Pinacidil	0.306452
Calcium glycerophosphate	0.306452
Sulfameter	0.305882
Oteseconazole	0.305882
Trilaciclib	0.305882
Carbamoylcholine	0.305556
Deferasirox	0.305556
Trimebutine	0.305556
Tazobactam	0.305263
Piretanide	0.305263
Isoniazid	0.305085
Oxycodone	0.304878
Bedaquiline	0.304878
Misoprostol	0.304348
Podofilox	0.304348
Podophyllin	0.304348
Strontium ranelate	0.304348
Butacaine	0.304348
Disperse Blue 106	0.304348
Upadacitinib	0.303797
Risperidone	0.303371
Rabeprazole	0.303371
Guanethidine	0.30303
Darifenacin	0.302632
Rufinamide	0.302632
Indigotindisulfonic acid	0.302326
Etofamide	0.302326
Valine	0.301887
Aminobenzoic acid	0.301887
Inositol	0.301887
Rilpivirine	0.301587
Chloroprocaine	0.30137
Solifenacin	0.30137
Acetazolamide	0.301205
Sulfinpyrazone	0.301205
Domperidone	0.301205
Sitagliptin	0.301205
Pipecuronium	0.301205
Amoxapine	0.3
Proguanil	0.3
Estramustine	0.3
Kava	0.3
Hydroxychloroquine	0.3
Lonafarnib	0.3
Fospropofol	0.3
Desoxycorticosterone acetate	0.3
Glycerol phenylbutyrate	0.3
Gemeprost	0.3
Isosorbide	0.3
Cycloguanil	0.3
Elexacaftor	0.299065
Dronedarone	0.298969
Olmesartan	0.298851
Estramustine phosphate	0.298851
Pipobroman	0.298507
Agomelatine	0.298507
Penicillamine	0.298246
Quinagolide	0.297872
Omeprazole	0.297619
Esomeprazole	0.297619
Buprenorphine	0.297619
Bilastine	0.297619
Siponimod	0.297619
Benperidol	0.297619
Hydroxyzine	0.297297
Sulfacetamide	0.297297
Mepivacaine	0.297297
Cyclopentolate	0.297297
Mannitol busulfan	0.297297
Piritramide	0.297297
Nylidrin	0.296875
Nicoboxil	0.296875
Indapamide	0.296703
Demecarium	0.296296
Retapamulin	0.296296
gamma-Hydroxybutyric acid	0.296296
Bendamustine	0.296296
Gallium citrate Ga-67	0.296296
Tofacitinib	0.296296
Potassium citrate	0.296296
Sodium citrate	0.296296
Calcium citrate	0.296296
Magnesium citrate	0.296296
Ferric pyrophosphate citrate	0.296296
Manganese citrate	0.296296
Lithium citrate	0.296296
Zafirlukast	0.295918
Antipyrine	0.295775
Dichloralphenazone	0.295775
Hydroflumethiazide	0.295455
Dorzolamide	0.295455
Guanabenz	0.295082
Fosfomycin	0.295082
Triclocarban	0.295082
Ipratropium	0.294872
Norgestimate	0.294872
Sulfoxone	0.294872
Filgotinib	0.294737
Pyrimethamine	0.294118
Allopurinol	0.294118
Frovatriptan	0.294118
Debrisoquine	0.294118
Milnacipran	0.294118
Levomilnacipran	0.294118
Florbetaben (18F)	0.294118
Alectinib	0.294118
Clobazam	0.293333
Capmatinib	0.293333
Ethyl salicylate	0.293103
Sulfamethoxazole	0.292683
Pancuronium	0.292683
Vecuronium	0.292683
Sertindole	0.292683
Ivabradine	0.292683
Oliceridine	0.292683
Tafamidis	0.292308
Bendroflumethiazide	0.292135
Hydrochlorothiazide	0.292135
Efinaconazole	0.292135
Taurolidine	0.292135
Disopyramide	0.291667
Zolpidem	0.291667
Etidocaine	0.291667
Artemotil	0.291667
Fedratinib	0.291262
Belinostat	0.291139
Ulipristal	0.291139
Ritiometan	0.290909
Diphenylguanidine	0.290909
Trazodone	0.290698
Apalutamide	0.290698
Mexiletine	0.290323
Benzthiazide	0.290323
Alclofenac	0.290323
Pyridostigmine	0.289855
Exametazime	0.289855
Berberine	0.289474
Norelgestromin	0.289474
Enzalutamide	0.289157
Urea	0.288462
Urea C-13	0.288462
Urea C-14	0.288462
Carbamide peroxide	0.288462
Biguanide	0.288462
Sodium tartrate	0.288462
Ketorolac	0.287879
Flutamide	0.287671
Isosorbide dinitrate	0.287671
Cocaine	0.287671
Anileridine	0.287671
Febuxostat	0.287671
Tizanidine	0.2875
Alosetron	0.2875
Tiotropium	0.2875
Lansoprazole	0.287356
Flunitrazepam	0.287356
Dexlansoprazole	0.287356
Bosutinib	0.287356
Amsacrine	0.285714
Mazindol	0.285714
Fluticasone propionate	0.285714
Cyclothiazide	0.285714
Amodiaquine	0.285714
Efavirenz	0.285714
Astemizole	0.285714
Propantheline	0.285714
Clobetasol propionate	0.285714
Ethinamate	0.285714
Praziquantel	0.285714
Phenazopyridine	0.285714
Fluspirilene	0.285714
Rimonabant	0.285714
Acipimox	0.285714
Cantharidin	0.285714
Bronopol	0.285714
Brilliant blue G	0.285714
Iloperidone	0.284091
Loratadine	0.283951
Aclidinium	0.283951
Fluorometholone	0.283784
Isosorbide mononitrate	0.283784
Indoramin	0.283784
Treosulfan	0.283784
Chlorzoxazone	0.283582
Nitroglycerin	0.283582
Dehydrocholic acid	0.283582
Succinic acid	0.283019
Magnesium glycinate	0.283019
Aluminum zirconium octachlorohydrex gly	0.283019
Ferrous bisglycinate	0.283019
Ferrous glycine sulfate	0.283019
Ibrutinib	0.282353
Fluconazole	0.282051
Halazepam	0.282051
Calcitriol	0.28169
Griseofulvin	0.28169
Axitinib	0.28169
Methoxsalen	0.28125
Pirfenidone	0.28125
Indocyanine green acid form	0.28125
Boscalid	0.28125
Dexamethasone metasulfobenzoate	0.28125
Ibutilide	0.280899
Acetylsalicylic acid	0.280702
Fenbufen	0.280702
Hydroxyamphetamine	0.280702
Oxilofrine	0.280702
Amifampridine	0.280702
Aminophenazone	0.28
Clobetasone	0.28
Metolazone	0.27957
Epinastine	0.279412
Rivastigmine	0.279412
Ursodeoxycholic acid	0.279412
Erythrityl tetranitrate	0.279412
Cholic Acid	0.279412
Deoxycholic acid	0.279412
Chenodeoxycholic acid	0.279412
Meradimate	0.279412
Phloxine B	0.279412
Irbesartan	0.27907
Triflusal	0.278689
Bisacodyl	0.278689
Raloxifene	0.278481
Bazedoxifene	0.278481
Lesinurad	0.278481
Nevirapine	0.277778
Pseudoephedrine	0.277778
Pilocarpine	0.277778
Ephedrine	0.277778
Xylometazoline	0.277778
Fesoterodine	0.277778
Sodium oxybate	0.277778
Acrivastine	0.277778
Racephedrine	0.277778
Sufentanil	0.277108
Tubocurarine	0.277108
Sulbactam	0.277108
Levocarnitine	0.276923
Tolazoline	0.276923
Brigatinib	0.276596
Diazepam	0.276316
Tiagabine	0.276316
Sulfabenzamide	0.276316
Chlorothiazide	0.275862
Azelastine	0.275862
Drometrizole trisiloxane	0.275862
Delavirdine	0.27551
Lamotrigine	0.275362
Neostigmine	0.275362
Calcipotriol	0.275362
Obeticholic acid	0.275362
Oxymetholone	0.275362
Diacetyl benzoyl lathyrol	0.275362
Flupentixol	0.275
Zonisamide	0.275
Sulfamerazine	0.275
Suvorexant	0.274725
Guanidine	0.27451
Crotamiton	0.274194
Edetate calcium disodium anhydrous	0.274194
Pramipexole	0.273973
Nicergoline	0.27381
Isavuconazole	0.27381
Cyclopenthiazide	0.273684
Oxyphenonium	0.272727
Phensuximide	0.272727
Trichlormethiazide	0.272727
Almitrine	0.272727
Prazepam	0.272727
Maraviroc	0.272727
Acetylcarnitine	0.272727
Isosulfan blue	0.272727
Ubidecarenone	0.272727
Propiverine	0.272727
Rucaparib	0.272727
Mebeverine	0.272727
Cinoxate	0.272727
Dofetilide	0.271739
Diamorphine	0.271605
Sulfamethazine	0.271605
Bisoctrizole	0.271605
Fentanyl	0.271429
Dienogest	0.271429
Piperonyl butoxide	0.271429
Ubiquinol	0.271429
Nomegestrol	0.271429
Metformin	0.271186
Salsalate	0.271186
Loxoprofen	0.271186
Lurasidone	0.270588
Ciclopirox	0.27027
Taurine	0.27027
Pramocaine	0.27027
Fluorescein	0.269841
Histamine	0.269841
Triheptanoin	0.269841
Crizotinib	0.269663
Fexinidazole	0.269663
Methantheline	0.269231
Oxatomide	0.269231
Mandelic acid	0.269231
Chlorambucil	0.268657
Testolactone	0.268657
Nonoxynol-9	0.268657
Bisphenol A diglycidyl ether	0.268657
Loxapine	0.268293
Flibanserin	0.268293
Benzhydrocodone	0.268293
Polythiazide	0.268041
Azelaic acid	0.267857
Salicylic acid	0.267857
Trolamine salicylate	0.267857
Oxybutynin	0.267606
Hydroxyprogesterone caproate	0.267606
Artenimol	0.267606
Betulinic Acid	0.267606
Gestonorone caproate	0.267606
Nimesulide	0.267442
Erdafitinib	0.267442
Ziprasidone	0.266667
Gallamine triethiodide	0.266667
Butorphanol	0.266667
Fenoldopam	0.266667
Etidronic acid	0.266667
Technetium Tc-99m etidronate	0.266667
Propylparaben	0.266667
Remimazolam	0.265823
Oxolamine	0.265823
Carbamazepine	0.265625
Ospemifene	0.265625
Stiripentol	0.265625
Bempedoic acid	0.265625
Emedastine	0.26506
Clotiazepam	0.26506
Gemfibrozil	0.264706
Naphazoline	0.264706
Bismuth subgallate	0.264706
Vandetanib	0.264368
Diethylcarbamazine	0.263889
Samarium (153Sm) lexidronam	0.263889
Antazoline	0.263889
Moxisylyte	0.263889
Homatropine	0.263889
Ropinirole	0.263158
Zaleplon	0.263158
Tetrabenazine	0.263158
Deutetrabenazine	0.263158
Ethyl hydroxybenzoate	0.263158
Sulfadiazine	0.2625
Granisetron	0.2625
Glycopyrronium	0.2625
Zuclopenthixol	0.2625
Arzoxifene	0.2625
Colfosceril palmitate	0.2625
DL-dimyristoylphosphatidylcholine	0.2625
1,2-Distearoyllecithin	0.2625
Medronic acid	0.262295
Butylparaben	0.262295
Trioxsalen	0.261538
Losartan	0.261364
Formestane	0.26087
Estetrol	0.26087
Mitapivat	0.26087
Daridorexant	0.260417
Terfenadine	0.260274
Amifostine	0.260274
Nitisinone	0.25974
Hexocyclium	0.25974
Fluphenazine	0.259259
Palovarotene	0.259259
Vismodegib	0.259259
Bismuth subcitrate potassium	0.259259
Tetraferric tricitrate decahydrate	0.259259
Flurazepam	0.258824
Acetohydroxamic acid	0.258621
Ponatinib	0.258427
Adenine	0.258065
Nizatidine	0.258065
Abrocitinib	0.258065
Betazole	0.257576
Papaverine	0.257576
Octisalate	0.257576
Benziodarone	0.257576
Megestrol acetate	0.257143
Medroxyprogesterone acetate	0.257143
Paricalcitol	0.257143
Methsuximide	0.257143
Perampanel	0.257143
Parthenolide	0.257143
Nomegestrol acetate	0.257143
Quinine	0.256757
Quinidine	0.256757
Quinidine barbiturate	0.256757
Telmisartan	0.25641
Physostigmine	0.256098
Amiodarone	0.256098
Dihydrocodeine	0.256098
Benzydamine	0.255814
Lactic acid	0.254902
L-Lactic acid	0.254902
Maralixibat	0.254902
Masoprocol	0.253968
Trolamine	0.253968
Pralidoxime	0.253731
Mercaptopurine	0.253731
Bismuth subsalicylate	0.253731
Permethrin	0.253731
Bioallethrin	0.253731
Ferric glycerophosphate	0.253731
Palonosetron	0.253521
Biperiden	0.253521
Rimexolone	0.253521
Alfacalcidol	0.253521
Phendimetrazine	0.253521
Oxeladin	0.253521
Ethylhexyl methoxycrylene	0.253521
Pexidartinib	0.253521
Segesterone acetate	0.253521
Apomorphine	0.253333
Tropisetron	0.253333
Morphine	0.253165
Hydromorphone	0.253165
Sulfapyridine	0.253165
Levocabastine	0.253165
Thonzylamine	0.253165
Metocurine iodide	0.253012
Pimozide	0.253012
Metocurine	0.253012
Netupitant	0.253012
Succinylcholine	0.25
Trospium	0.25
Atomoxetine	0.25
Minoxidil	0.25
Chlordiazepoxide	0.25
Foscarnet	0.25
Sulfamethizole	0.25
Clidinium	0.25
Mifepristone	0.25
Miconazole	0.25
Econazole	0.25
Dezocine	0.25
Pipotiazine	0.25
Mepenzolate	0.25
Silver sulfadiazine	0.25
Pazopanib	0.25
Artemether	0.25
Desvenlafaxine	0.25
Tetryzoline	0.25
Isoconazole	0.25
Pinaverium	0.25
Technetium Tc-99m oxidronate	0.25
Pentoxyverine	0.25
Amiloxate	0.25
Dioxybenzone	0.25
Gestrinone	0.25
Oxidronic acid	0.25
Light green SF yellowish	0.247059
Perphenazine	0.246914
Haloperidol	0.246753
Bromperidol	0.246753
Spironolactone	0.246575
Dyclonine	0.246575
Clofazimine	0.246575
Levonorgestrel	0.246377
Trihexyphenidyl	0.246377
Nandrolone phenpropionate	0.246377
Estriol	0.246377
Plerixafor	0.246377
Norgestrel	0.246377
Testosterone cypionate	0.246377
Acitretin	0.245902
Diacerein	0.245902
Succimer	0.245283
Technetium Tc-99m succimer	0.245283
Dimercaptosuccinic acid	0.245283
Indocyanine green	0.244681
Sulthiame	0.244444
Valdecoxib	0.243902
Galantamine	0.243902
Prasugrel	0.243902
Meticrane	0.243902
Oxiconazole	0.24359
Rofecoxib	0.24359
Homatropine methylbromide	0.24359
Tioconazole	0.243243
Fluoxymesterone	0.243243
Isopropamide	0.243243
Mafenide	0.243243
Medrysone	0.242857
Etonogestrel	0.242857
Fluoxetine	0.242857
Cycrimine	0.242857
Drospirenone	0.242857
Nandrolone decanoate	0.242857
Octocrylene	0.242424
Suprofen	0.241379
Tiaprofenic acid	0.241379
Sulfaphenazole	0.241379
Methyl salicylate	0.241379
Benzylparaben	0.241379
Niacin	0.240741
Ketoprofen	0.240741
Dimercaprol	0.240741
Paraldehyde	0.240741
Dexketoprofen	0.240741
Periciazine	0.240506
Dibenzepin	0.240506
Doxylamine	0.24
Eplerenone	0.24
Carbinoxamine	0.24
Bepridil	0.24
Cyproterone acetate	0.24
Tinidazole	0.239583
Calcifediol	0.239437
Imiquimod	0.239437
Ethynodiol diacetate	0.239437
Testosterone propionate	0.239437
Doxercalciferol	0.239437
Testosterone enanthate	0.239437
Testosterone undecanoate	0.239437
D-alpha-Tocopherol acetate	0.239437
DL-alpha tocopheryl acetate	0.239437
Prasterone enantate	0.239437
Laropiprant	0.23913
Temoporfin	0.238806
Chlormezanone	0.238636
Ecamsule	0.238636
Lutein	0.238095
Carprofen	0.238095
Diflunisal	0.238095
Azathioprine	0.238095
Betahistine	0.238095
Zeaxanthin	0.238095
Danazol	0.2375
Stanozolol	0.2375
Alcaftadine	0.2375
Dantron	0.237288
Tramadol	0.236842
Donepezil	0.236842
Sertaconazole	0.236842
Hexetidine	0.236842
Phenylbutyric acid	0.236364
Chromium picolinate	0.236364
Duloxetine	0.236111
Nabilone	0.236111
Ketamine	0.236111
Difenoxin	0.236111
Abiraterone	0.236111
Esketamine	0.236111
Pyruvic acid	0.235294
Probenecid	0.235294
Prasterone	0.235294
Amylocaine	0.235294
Thonzonium	0.235294
Vanillyl butyl ether	0.235294
Dimazole	0.235294
Codeine	0.234568
Hydrocodone	0.234568
Flosequinan	0.234568
Phenolphthalein	0.234375
Dabrafenib	0.234043
Ondansetron	0.233766
Perhexiline	0.233333
Tapinarof	0.233333
Flavone	0.233333
Diphenoxylate	0.232877
Umeclidinium	0.232877
Diazoxide	0.232558
Methyl nicotinate	0.232143
Resorcinol monoacetate	0.232143
Testosterone	0.231884
Norethisterone	0.231884
Atovaquone	0.231884
Pregnenolone	0.231884
Norethynodrel	0.231884
Menadiol diphosphate	0.231884
Adiphenine	0.231884
Sulfathiazole	0.231707
Sulindac	0.230769
Sumatriptan	0.230769
Trimethaphan	0.230769
Mepyramine	0.230769
Phenylacetic acid	0.230769
Hexylresorcinol	0.230769
Vonoprazan	0.230769
Venlafaxine	0.22973
Clofedanol	0.22973
Phenelzine	0.229508
Naratriptan	0.229167
Diphenidol	0.228571
Methyltestosterone	0.228571
Cannabidiol	0.228571
Tibolone	0.228571
Padimate O	0.228571
Choline magnesium trisalicylate	0.22807
Doconexent	0.22807
Benzoyl peroxide	0.22807
Propiolactone	0.22807
Choline salicylate	0.22807
Homosalate	0.227273
Fenofibric acid	0.227273
Baricitinib	0.226804
Flutemetamol (18F)	0.226667
Ebastine	0.226667
Triclabendazole	0.226667
Monomethyl fumarate	0.226415
Piperazine	0.225806
Diethyltoluamide	0.225806
Procyclidine	0.225352
Dextropropoxyphene	0.225352
Dicyclomine	0.225352
Amorolfine	0.225352
Estradiol acetate	0.225352
Estradiol benzoate	0.225352
Laurocapram	0.225352
Pentazocine	0.225
alpha-Linolenic acid	0.224138
Icosapent	0.224138
Phenylethyl resorcinol	0.224138
Clofibrate	0.223881
Hydralazine	0.223881
Octinoxate	0.223881
Brilliant green cation	0.223881
Dihydralazine	0.223881
Medifoxamine	0.223881
Aceclidine	0.223881
Tazarotene	0.223684
Halofantrine	0.223684
Dequalinium	0.223684
Ioflupane I-123	0.223684
Vitamin A	0.222222
Dronabinol	0.222222
Riluzole	0.222222
Polidocanol	0.222222
Estradiol dienanthate	0.222222
Propiomazine	0.220779
Lasofoxifene	0.220779
Lumefantrine	0.220779
Vortioxetine	0.220779
Picosulfuric acid	0.220779
Lumefantrine co-artemether	0.220779
Menthyl salicylate	0.220588
Proflavine	0.220339
Eugenol	0.220339
[truncated: 587 more rows]

## Sheet: (C)Similarity to BCX-2798
The chemical similarity of BCX-2798 and 2585 approved drugs
Drug	T(BCX-2798)
Zanamivir	0.766667
Streptozocin	0.716418
Hyaluronic acid	0.66129
Zidovudine	0.648649
Bortezomib D-mannitol	0.628571
Acarbose	0.603175
Amikacin	0.597015
Plazomicin	0.594595
N-Acetylglucosamine	0.571429
Ribavirin	0.569444
Oseltamivir	0.569231
Telbivudine	0.567568
Balsalazide	0.567164
Benserazide	0.567164
Riboflavin	0.565789
Regadenoson	0.564103
Fosdenopterin	0.564103
Streptomycin	0.56338
Vancomycin	0.5625
Cytarabine	0.561644
Capreomycin	0.56
Viomycin	0.56
Plecanatide	0.56
Edoxudine	0.56
Glucosamine	0.559322
Stavudine	0.557143
Azacitidine	0.555556
Raltegravir	0.555556
Inosine pranobex	0.554054
Kanamycin	0.553846
Roxadustat	0.552239
Chloramphenicol	0.550725
Netilmicin	0.547945
Dihydrostreptomycin	0.547945
Pantothenic acid	0.546875
Iopamidol	0.546875
Tobramycin	0.545455
Iodixanol	0.542857
Polymyxin B	0.540541
Brivudine	0.539474
Framycetin	0.537313
Paromomycin	0.537313
Ribostamycin	0.537313
Terizidone	0.536232
Oritavancin	0.535714
Acebutolol	0.535211
Iobitridol	0.535211
Colistin	0.534247
Iotrolan	0.534247
Idoxuridine	0.532468
Floxuridine	0.532468
Tigecycline	0.531646
Spectinomycin	0.53125
Iohexol	0.529412
Ziconotide	0.529412
Dibekacin	0.529412
Pantethine	0.528571
Paclitaxel	0.527778
Romidepsin	0.527778
Uridine triacetate	0.527778
Gadopiclenol	0.527778
Vidarabine	0.527027
Adenosine	0.527027
Dyphylline	0.526316
Trifluridine	0.525641
Atazanavir	0.525641
Flavin mononucleotide	0.52381
Sofosbuvir	0.523256
Practolol	0.523077
Latamoxef	0.522222
Epirubicin	0.520548
Doxorubicin	0.520548
Decitabine	0.52
Entacapone	0.519481
Lopinavir	0.518519
Somatostatin	0.518519
Capecitabine	0.517647
Flavin adenine dinucleotide	0.516854
Dexpanthenol	0.515625
Panthenol	0.515625
Proxibarbal	0.514706
Iomeprol	0.514286
Candicidin	0.513889
Sapropterin	0.513514
Chloramphenicol succinate	0.513514
Daptomycin	0.512195
Valganciclovir	0.512195
Linaclotide	0.512195
NADH	0.511628
Rifabutin	0.511364
Bleomycin	0.51087
Mecobalamin	0.510417
Atenolol	0.507692
Natamycin	0.507463
Ioxilan	0.507042
Iopromide	0.506849
Novobiocin	0.506667
Celiprolol	0.506667
Micronomicin	0.506667
Gemcitabine	0.506494
Nitrofurantoin	0.506494
Mifamurtide	0.506494
Nelarabine	0.506329
Maribavir	0.506329
Bacitracin	0.506173
Cefpiramide	0.505618
Cefmetazole	0.505495
Citicoline	0.505495
Cyclosporine	0.5
Cyanocobalamin	0.5
Nystatin	0.5
Leucovorin	0.5
Amphotericin B	0.5
Gentamicin	0.5
Rifapentine	0.5
Isocarboxazid	0.5
Docetaxel	0.5
Cefotetan	0.5
Everolimus	0.5
Peramivir	0.5
Aliskiren	0.5
Cyanocobalamin Co-57	0.5
Cyanocobalamin Co-60	0.5
Levomefolic acid	0.5
Levoleucovorin	0.5
Naldemedine	0.5
Calcium glubionate anhydrous	0.5
Testosterone enantate benzilic acid hydrazone	0.5
Chloramphenicol palmitate	0.5
Rifampicin	0.494382
Remdesivir	0.494382
Semaglutide	0.494253
Gonadorelin	0.494118
Nafarelin	0.494118
Triptorelin	0.494118
Indium In-111 pentetreotide	0.494118
Fondaparinux	0.493827
Fludarabine	0.493671
Dantrolene	0.493671
Rifaximin	0.493671
Temsirolimus	0.493671
Ertapenem	0.493506
Cilazapril	0.493333
Eltrombopag	0.493333
Cabazitaxel	0.493333
Voclosporin	0.493333
Bortezomib	0.492754
Amlexanox	0.492754
Cycloserine	0.492537
Netarsudil	0.492537
Migalastat	0.492063
Pramlintide	0.488889
Cefamandole	0.488636
Cefazolin	0.488372
Cefuroxime	0.488095
Pentetreotide	0.488095
Cidofovir	0.487805
Cefoxitin	0.487805
Tedizolid	0.487805
Pentostatin	0.4875
Lanreotide	0.4875
Olodaterol	0.487179
Phenoxymethylpenicillin	0.486842
Belumosudil	0.486486
Floctafenine	0.485714
Metipranolol	0.484848
Telavancin	0.484536
Goserelin	0.483871
Fosaprepitant	0.483871
Ceftazidime	0.483516
Afamelanotide	0.483146
Leuprolide	0.482759
Cefixime	0.482759
Histrelin	0.482759
Edotreotide gallium Ga-68	0.482759
Bivalirudin	0.482353
Ademetionine	0.482353
Lymecycline	0.482353
Topotecan	0.482353
Entecavir	0.481928
Caspofungin	0.481928
Mitomycin	0.481481
Cabotegravir	0.481481
Nimodipine	0.481013
Saquinavir	0.481013
Omadacycline	0.481013
Ceftolozane	0.480769
Folic acid	0.480519
Tacrolimus	0.480519
Sirolimus	0.480519
Spiramycin	0.48
Ioversol	0.479452
Nicorandil	0.479452
Imidurea	0.479452
Ixazomib	0.478873
Rifamycin	0.478873
Piflufolastat F 18	0.478873
Pirbuterol	0.478261
Timolol	0.477778
Tetracosactide	0.477778
Clavulanic acid	0.477612
Technetium Tc-99m disofenin	0.477612
Ioxitalamic acid	0.477612
Dotatate gallium Ga-68	0.476744
Lutetium Lu 177 dotatate	0.476744
Copper oxodotreotide Cu-64	0.476744
Atosiban	0.47619
Valrubicin	0.47561
Dolutegravir	0.47561
Ozanimod	0.47561
Cedazuridine	0.475
Aminohippuric acid	0.474576
Zalcitabine	0.474359
Oxamniquine	0.474359
Asparagine	0.473684
Gadobutrol	0.473684
Difelikefalin	0.473684
Pralatrexate	0.472222
Tedizolid phosphate	0.47191
Brincidofovir	0.47191
Cefamandole nafate	0.47191
Nialamide	0.471429
Ivacaftor	0.471429
Cefotaxime	0.471264
Ergotamine	0.471264
Midodrine	0.470588
Sarecycline	0.470588
Adenosine phosphate	0.46988
Lacosamide	0.469697
Cefoperazone	0.469388
Carfilzomib	0.469136
Molsidomine	0.469136
Oteracil	0.46875
Telaprevir	0.468354
Serdexmethylphenidate	0.467532
Ceftriaxone	0.467391
Nisoldipine	0.466667
Vaborbactam	0.466667
Gramicidin D	0.465753
Doxycycline	0.465753
Nitrofural	0.465753
Oxytetracycline	0.465753
Metacycline	0.465753
Diazolidinylurea	0.465753
Gluconolactone	0.465517
Dotatate	0.465116
Anidulafungin	0.464286
Roxithromycin	0.464286
Azlocillin	0.464286
Opicapone	0.464286
Pentagastrin	0.463415
Indinavir	0.463415
Ganciclovir	0.463415
Cefotiam	0.463158
Butalbital	0.462687
Alvimopan	0.4625
Bictegravir	0.4625
Cefmenoxime	0.462366
Cefalotin	0.461538
Methotrexate	0.461538
Ceforanide	0.461538
Colistimethate	0.461538
Oxprenolol	0.461538
Degarelix	0.461538
Buserelin	0.461538
Sinapultide	0.461538
Deflazacort	0.461538
Darolutamide	0.461538
Abarelix	0.460674
Dactinomycin	0.460674
Cefpodoxime	0.460674
Carteolol	0.460526
Cephaloglycin	0.460526
Tetracycline	0.460526
Minocycline	0.460526
Tetracycline phosphate complex	0.460526
Betiatide	0.460317
Rolitetracycline	0.45977
Dihydro-alpha-ergocryptine	0.45977
Epicriptine	0.45977
Dihydroergocristine	0.45977
Nitrendipine	0.459459
Cefradine	0.459459
Nilvadipine	0.459459
Ioxaglic acid	0.459459
Alatrofloxacin	0.458824
Idarubicin	0.458333
Indacaterol	0.458333
Ritonavir	0.457831
Tazemetostat	0.457831
Sodium ascorbate	0.457627
Calcium ascorbate	0.457627
Magnesium ascorbate	0.457627
Zinc ascorbate	0.457627
Valsartan	0.45679
Pimecrolimus	0.45679
Atorvastatin	0.45679
Fursultiamine	0.45679
Fostamatinib	0.456522
Esmolol	0.455882
Carbidopa	0.455882
Clofarabine	0.455696
Meropenem	0.455696
Didanosine	0.455696
Ceftibuten	0.455696
Eravacycline	0.455556
Azithromycin	0.454545
Cinoxacin	0.454545
Gallium Ga-68 gozetotide	0.454545
Vasopressin	0.453488
Dihydroergotamine	0.453488
Icatibant	0.453488
Dihydroergocornine	0.453488
Tezacaftor	0.453488
Erythromycin	0.453333
Cefadroxil	0.453333
Cefprozil	0.453333
Glutathione	0.453125
Bucetin	0.453125
Ceftizoxime	0.452381
Cefiderocol	0.451923
Bromocriptine	0.451613
Cladribine	0.45122
Ximelagatran	0.45122
Lypressin	0.45122
Ceftobiprole medocaril	0.45098
Labetalol	0.450704
Cilastatin	0.450704
Quinupristin	0.450549
Doripenem	0.450549
Ibrexafungerp	0.450549
Ascorbic acid	0.45
Moxidectin	0.45
Gaxilose	0.45
Lactitol	0.45
Niacinamide ascorbate	0.45
Ferrous ascorbate	0.45
Deucravacitinib	0.45
Elagolix	0.449438
Bumadizone	0.449275
Demeclocycline	0.448718
Pemetrexed	0.448718
Xamoterol	0.448718
Cefditoren	0.448276
Acetylcysteine	0.448276
Gabapentin enacarbil	0.447761
Eribulin	0.447368
Cefdinir	0.447059
Valaciclovir	0.447059
Bosentan	0.446809
Cephalexin	0.445946
Daunorubicin	0.445946
Benzylpenicillin	0.445946
Procaine benzylpenicillin	0.445946
Cetrorelix	0.445652
Ganirelix	0.445652
Isradipine	0.444444
Repaglinide	0.444444
Cefapirin	0.444444
Lincomycin	0.444444
Lodoxamide	0.444444
Etelcalcetide	0.444444
Isavuconazonium	0.443299
Azilsartan medoxomil	0.443182
Dacarbazine	0.442857
Enalaprilat	0.442857
N-acetyltyrosine	0.442623
Desmopressin	0.44186
Gallium-68 PSMA	0.441558
Bimatoprost	0.441176
Procaterol	0.441176
Diosmin	0.441176
Raltitrexed	0.440476
Carbetocin	0.440476
Clarithromycin	0.44
Acenocoumarol	0.44
Cangrelor	0.44
Methocarbamol	0.439394
Salbutamol	0.439394
Levosalbutamol	0.439394
Oxacillin	0.439024
Ramipril	0.438356
Carbenicillin	0.438356
Procaine merethoxylline	0.438356
Aprepitant	0.438202
Nafcillin	0.4375
Lamivudine	0.4375
Boceprevir	0.4375
Chlortetracycline	0.4375
Cobicistat	0.436782
Mupirocin	0.43662
Technetium Tc-99m mebrofenin	0.43662
Mebrofenin	0.43662
Ticagrelor	0.43617
Pivampicillin	0.435897
Vibegron	0.435897
Diatrizoate	0.435484
Ferric derisomaltose	0.435484
Manidipine	0.435294
Binimetinib	0.435294
Vindesine	0.434783
Levosimendan	0.434783
Oxaliplatin	0.434211
Quinapril	0.434211
Fidaxomicin	0.434211
Ponesimod	0.433333
Lurbinectedin	0.433333
Rutin	0.432836
Glutathione disulfide	0.432836
Trandolapril	0.432432
Enalapril	0.432432
Perindopril	0.432432
Ranolazine	0.432099
Nitazoxanide	0.432099
Moexipril	0.432099
Eliglustat	0.432099
Dabigatran	0.432099
Amprenavir	0.431579
Baloxavir marboxil	0.431579
Esculin	0.430769
Lisinopril	0.430556
Bacampicillin	0.43038
Candesartan cilexetil	0.430233
Selumetinib	0.430233
Telotristat ethyl	0.430233
Itraconazole	0.430108
Nelfinavir	0.428571
Nicardipine	0.428571
Emtricitabine	0.428571
Formoterol	0.428571
Procarbazine	0.428571
Clindamycin	0.428571
Olsalazine	0.428571
Arformoterol	0.428571
Ceftobiprole	0.428571
Polydatin	0.428571
Temocillin	0.428571
Cefonicid	0.427184
Telithromycin	0.426966
Rosuvastatin	0.426966
Trabectedin	0.426966
Amoxicillin	0.426667
Niclosamide	0.426667
Dipivefrin	0.426471
Orciprenaline	0.42623
Meglumine	0.42623
Posaconazole	0.425532
Dalfopristin	0.425532
Lercanidipine	0.425287
Alfentanil	0.425287
Finafloxacin	0.425287
Xanthinol	0.425287
Gilteritinib	0.425287
Lomustine	0.424658
1,2-icosapentoyl-sn-glycero-3-phosphoserine	0.424658
Irinotecan	0.423913
Isoxicam	0.423913
Fostemsavir	0.423913
Linzagolix	0.423529
Pafolacianine	0.423423
Benazepril	0.423077
Midostaurin	0.423077
Lutetium Lu-177 vipivotide tetraxetan	0.423077
Talbutal	0.422535
Tolcapone	0.422535
Miglitol	0.422535
Nadolol	0.422535
Capsaicin	0.422535
Zucapsaicin	0.422535
Rebamipide	0.422535
Colchiceine	0.422535
Tenofovir alafenamide	0.422222
Bicalutamide	0.421687
Tucatinib	0.421687
Setmelanotide	0.421687
Ceftaroline fosamil	0.421569
Cefaclor	0.421053
Ouabain	0.421053
Cabozantinib	0.421053
Pheneticillin	0.421053
Bendazac	0.421053
Afatinib	0.420455
Entrectinib	0.420455
Doravirine	0.420455
Bisoprolol	0.42029
Metaxalone	0.42029
Primidone	0.42029
Pindolol	0.42029
Iocetamic acid	0.42029
Nedaplatin	0.42029
Isoprenaline	0.419355
Lactose	0.419355
Arbutin	0.419355
alpha-Arbutin	0.419355
Glecaprevir	0.419048
Ampicillin	0.418919
Miglustat	0.418919
Nifedipine	0.418919
Ticarcillin	0.418919
Voxelotor	0.418919
Dicloxacillin	0.418605
Cloxacillin	0.418605
Oxtriphylline	0.418605
Nintedanib	0.418605
Argatroban	0.418367
Darunavir	0.418367
Calcium threonate	0.418182
Sacubitril	0.41791
Naftazone	0.41791
Cyclacillin	0.417722
Ergometrine	0.417722
Samidorphan	0.417722
Piperacillin	0.417582
Alfuzosin	0.417582
Meloxicam	0.417582
Micafungin	0.417476
Tiopronin	0.416667
Undecoylium chloride iodine complex	0.416667
Grazoprevir	0.415842
Piroxicam	0.41573
Sultamicillin	0.41573
Copanlisib	0.41573
Mobocertinib	0.41573
Deslanoside	0.415584
Secnidazole	0.415584
Lactulose	0.415385
Nateglinide	0.415385
Aztreonam	0.414894
Nilutamide	0.414634
Cilostazol	0.414634
Ixabepilone	0.414634
Flucloxacillin	0.413793
Velpatasvir	0.413793
Loracarbef	0.413333
Articaine	0.413333
Aurothioglucose	0.412698
Tannic acid	0.412698
Methylergometrine	0.4125
Benznidazole	0.4125
Acyclovir	0.411765
Ranitidine	0.411765
Phenobarbital	0.411765
Carboxin	0.411765
Hesperidin	0.411765
Lacidipine	0.411765
Secobarbital	0.410959
Cerivastatin	0.410959
Mitoxantrone	0.410959
Amobarbital	0.410959
Enasidenib	0.410959
Calcium glucoheptonate	0.410714
Calcium gluconate	0.410714
Manganese gluconate	0.410714
Copper gluconate	0.410714
Zinc gluconate	0.410714
Potassium gluconate	0.410714
Magnesium gluconate	0.410714
Ferrous gluconate	0.410714
Chromium gluconate	0.410714
Meticillin	0.410256
Lumacaftor	0.410256
Olmesartan	0.409639
Penciclovir	0.409639
Pasireotide	0.409639
Elbasvir	0.409639
Propranolol	0.409091
Allantoin	0.409091
Alcloxa	0.409091
Benfotiamine	0.409091
Venetoclax	0.408696
Sitaxentan	0.408602
Butabarbital	0.408451
Gadoversetamide	0.408451
Macimorelin	0.408451
Temozolomide	0.407895
Flecainide	0.407895
Oxyphenbutazone	0.407895
Latanoprostene bunod	0.407895
Steviolbioside	0.407895
Finerenone	0.407895
Methysergide	0.407407
Imipenem	0.407407
Eluxadoline	0.407407
Tenofovir disoproxil	0.406977
Doxazosin	0.406977
Cisapride	0.406977
Tenoxicam	0.406593
Vincristine	0.406593
Ceruletide	0.40625
Terbutaline	0.40625
Teriflunomide	0.40625
Paritaprevir	0.40625
Cefpirome	0.40625
Betaxolol	0.405797
Metoprolol	0.405797
Ingenol mebutate	0.405797
Erdosteine	0.405797
Levobetaxolol	0.405797
Lapyrium	0.405405
Troleandomycin	0.405405
Cenobamate	0.405063
Glipizide	0.404494
Fosamprenavir	0.40404
Cefepime	0.40404
Aspartic acid	0.403509
D-Serine	0.403509
Carmustine	0.402778
Clorazepic acid	0.402778
Levobunolol	0.402778
Bezafibrate	0.402778
Sodium stibogluconate	0.402778
Mavacamten	0.402778
Sotalol	0.402597
Nedocromil	0.402597
Uracil mustard	0.402597
Relugolix	0.402062
L-Glutamine	0.4
Amlodipine	0.4
Methscopolamine bromide	0.4
Linezolid	0.4
Sulfasalazine	0.4
Orlistat	0.4
Gemifloxacin	0.4
Desonide	0.4
Spirapril	0.4
Ketazolam	0.4
Sucrose	0.4
Fusafungine	0.4
Sincalide	0.4
Iron sucrose	0.4
Levamlodipine	0.4
Carindacillin	0.4
Protirelin	0.4
Sodium ferric gluconate complex	0.4
Methscopolamine	0.4
Lusutrombopag	0.4
Selpercatinib	0.4
Asunaprevir	0.398058
Omidenepag isopropyl	0.397849
Troglitazone	0.39759
Fosphenytoin	0.39759
Istradefylline	0.39759
Umbralisib	0.39759
Tegafur	0.397436
Tegafur-uracil	0.397436
Betrixaban	0.397436
Butobarbital	0.39726
Protokylol	0.39726
Guanoxan	0.397059
Chlorphenesin carbamate	0.397059
Fructose	0.396825
Carglumic acid	0.396825
Iothalamic acid	0.396825
Gimeracil	0.396825
Odevixibat	0.396226
Selexipag	0.395833
Furosemide	0.395349
Omacetaxine mepesuccinate	0.395349
Mangafodipir	0.395349
Fosinopril	0.395062
Metronidazole	0.395062
Digoxin	0.394737
Trimethobenzamide	0.394737
Pomalidomide	0.394737
Carboplatin	0.394366
Colchicine	0.394366
Ezogabine	0.394366
Bufexamac	0.394366
Cromoglicic acid	0.393939
Aceclofenac	0.393939
Alloin	0.393939
Felbamate	0.393443
Moxifloxacin	0.393258
Pretomanid	0.393258
Dabigatran etexilate	0.393258
Asciminib	0.393258
Disperse Blue 106	0.393258
Pralsetinib	0.393258
Tipiracil	0.392857
Gluconic Acid	0.392857
Hetacillin	0.392405
Pentobarbital	0.391892
Zoledronic acid	0.391892
Pemirolast	0.391892
Glycyrrhizic acid	0.391892
Zoledronate D,L-Lysine Monohydrate	0.391892
Tipranavir	0.391753
Encorafenib	0.391753
Gadodiamide	0.391304
Gadobenic acid	0.391304
Paliperidone	0.391304
Iodipamide	0.391304
Tyropanoic acid	0.391304
Udenafil	0.390909
Enoxacin	0.390805
Rivaroxaban	0.390805
Elvitegravir	0.390244
Tivozanib	0.390244
PBT-434	0.390244
Mezlocillin	0.39
Flunisolide	0.38961
Fluocinolone acetonide	0.38961
Vildagliptin	0.38961
Bisoctrizole	0.38961
Lornoxicam	0.389474
Terconazole	0.388889
Prednisone	0.388889
Hydrocortisone	0.388889
Tirofiban	0.388889
Prednisolone	0.388889
Gatifloxacin	0.388889
Penbutolol	0.388889
Avanafil	0.388889
Voxilaprevir	0.388889
Norfloxacin	0.388235
Palbociclib	0.388235
Tepotinib	0.388235
Fluorouracil	0.38806
Methyprylon	0.38806
Pemoline	0.38806
Sugammadex	0.38806
Metrizoic acid	0.38806
Metamizole	0.387097
Nepafenac	0.387097
Iodohippurate sodium I-131	0.387097
Iodohippurate sodium I-123	0.387097
Padeliporfin	0.387097
Oftasceine	0.386667
Lomefloxacin	0.386364
Terazosin	0.386364
Zanubrutinib	0.386364
Acetarsol	0.385714
Moricizine	0.385542
Tadalafil	0.385542
Drometrizole trisiloxane	0.385542
Macitentan	0.385417
Vinblastine	0.384615
Carvedilol	0.384615
Nitrazepam	0.384615
Tolvaptan	0.384615
Spinosad	0.384615
Mirabegron	0.384615
Lefamulin	0.384615
Apixaban	0.383721
Delafloxacin	0.383721
Pyridoxal phosphate	0.383562
Methylprednisolone	0.383562
Methylprednisone	0.383562
Vorinostat	0.382353
Idebenone	0.382353
Favipiravir	0.382353
Adefovir dipivoxil	0.382022
Dasatinib	0.382022
Silodosin	0.382022
Acetyldigitoxin	0.381579
Triamcinolone	0.381579
Trimetrexate	0.381579
Budesonide	0.381579
Digitoxin	0.381579
Olutasidenib	0.381579
Levodopa	0.380952
Revefenacin	0.380952
Dasabuvir	0.380435
Flutamide	0.380282
Enoximone	0.380282
Flurandrenolide	0.379747
Lenvatinib	0.379747
Lemborexant	0.379747
Grepafloxacin	0.37931
Levofloxacin	0.37931
Ofloxacin	0.37931
Pyridoxine	0.378788
Methyldopa	0.378788
Fenoterol	0.378788
Bicisate	0.378788
Dexrazoxane	0.378378
Methohexital	0.378378
Deferoxamine	0.378378
Nalidixic acid	0.378378
Prednisolone tebutate	0.378378
Topiramate	0.378049
Clonazepam	0.378049
Vorapaxar	0.378049
Cocarboxylase	0.377778
Apremilast	0.377778
Pibrentasvir	0.377778
Relebactam	0.377551
Droxidopa	0.377049
Apronalide	0.377049
Pioglitazone	0.376623
Thiamylal	0.376623
Sparfloxacin	0.376471
Neratinib	0.376471
Tazobactam	0.376344
Edoxaban	0.376344
Isoetharine	0.375
Travoprost	0.375
Scopolamine	0.375
Enprofylline	0.375
D-glucose	0.375
Pidolic acid	0.375
Prucalopride	0.375
Xylose	0.375
Galactose	0.375
Benorilate	0.375
Sodium 1,2-Dipalmitoyl-sn-glycero-3-phospho-(1'-rac-glycerol)	0.375
Bumetanide	0.373626
Tafenoquine	0.373494
Vericiguat	0.373494
Diflorasone	0.373333
Alclometasone	0.373333
Flumethasone	0.373333
Etodolac	0.373333
Mycophenolic acid	0.373333
Propafenone	0.373333
Rufinamide	0.373333
Hydroxyethyl cellulose	0.373134
Lifitegrast	0.37234
Nifurtimox	0.37234
Fosnetupitant	0.37234
Pemigatinib	0.37234
Rocuronium	0.372093
Ivermectin	0.371795
Tirbanibulin	0.371795
Ozenoxacin	0.371795
Felodipine	0.371429
Antipyrine	0.371429
Dichloralphenazone	0.371429
5-O-phosphono-alpha-D-ribofuranosyl diphosphate	0.371429
Cystine	0.370968
Ketoconazole	0.370787
Sulfadoxine	0.370787
Levoketoconazole	0.370787
Osimertinib	0.370787
Larotrectinib	0.370787
Hydrocortamate	0.37037
Daclatasvir	0.37037
Gliquidone	0.37
Trimethoprim	0.369863
Methylphenobarbital	0.369863
Aminophenazone	0.369863
Plicamycin	0.369863
Gadoxetic acid	0.369863
Meprednisone	0.369863
1-Palmitoyl-2-oleoyl-sn-glycero-3-(phospho-rac-(1-glycerol))	0.369863
Hydrocortisone cypionate	0.369863
Hydrocortisone succinate	0.369863
Vinorelbine	0.369565
Bromfenac	0.369231
Torasemide	0.369048
Ciprofloxacin	0.369048
Riociguat	0.369048
Oteseconazole	0.369048
Nirmatrelvir	0.369048
Sorafenib	0.368421
Fludrocortisone	0.368421
Clevidipine	0.368421
Regorafenib	0.368421
Fluprednisolone	0.368421
Muzolimine	0.368421
Prilocaine	0.367647
Clenbuterol	0.367647
Exametazime	0.367647
Delamanid	0.367347
Lenalidomide	0.367089
Minaprine	0.367089
Remifentanil	0.367089
Ifosfamide	0.367089
Acemetacin	0.367089
Melphalan flufenamide	0.367089
Taurocholic acid	0.366667
Tauroursodeoxycholic acid	0.366667
Guanadrel	0.366197
Dapagliflozin	0.366197
Tafluprost	0.366197
Sulfinpyrazone	0.365854
Rolapitant	0.365854
Ombitasvir	0.365854
Guaifenesin	0.365079
Biotin	0.364865
Thalidomide	0.364865
Fluvastatin	0.364865
Nebivolol	0.364865
Tecovirimat	0.364865
Hydrocortisone acetate	0.364865
Methylprednisolone hemisuccinate	0.364865
Prednisolone acetate	0.364865
Alogliptin	0.364706
Etofamide	0.364706
Ubrogepant	0.364706
Simeprevir	0.364486
Betamethasone	0.363636
Prazosin	0.363636
Erlotinib	0.363636
Latanoprost	0.363636
Dexamethasone	0.363636
Ciclesonide	0.363636
Pivmecillinam	0.363636
Fluclorolone acetonide	0.363636
Oxetacaine	0.363636
Sodium feredetate	0.3625
Bisoxatin	0.362319
Bronopol	0.362319
Elexacaftor	0.361905
Pentoxifylline	0.361446
Rescinnamine	0.361446
Moxonidine	0.361446
Ethotoin	0.361111
Salmeterol	0.361111
Deferasirox	0.361111
Tasimelteon	0.361111
Carbocisteine	0.360656
Solriamfetol	0.360656
Parecoxib	0.360465
Ledipasvir	0.360465
Fexinidazole	0.360465
Risdiplam	0.360465
Atogepant	0.360465
Glimepiride	0.36
Verteporfin	0.36
Phenylbutazone	0.36
Hydrocortisone butyrate	0.36
Hydrocortisone valerate	0.36
Letermovir	0.359551
Epinephrine	0.359375
Lisdexamfetamine	0.359375
Cyclophosphamide	0.358974
Voriconazole	0.358974
Thiopental	0.358974
Fluocinonide	0.358974
Selinexor	0.358974
Carbocromen	0.358974
Risedronic acid	0.358209
Oxaprozin	0.358209
Kinetin	0.358209
Fluorodopa (18F)	0.358209
Talazoparib	0.358025
Pamidronic acid	0.357143
Carisoprodol	0.357143
Methazolamide	0.357143
Benzonatate	0.357143
Amisulpride	0.357143
Rosiglitazone	0.356322
Cobimetinib	0.356322
Besifloxacin	0.356322
Futibatinib	0.356322
Aminoglutethimide	0.356164
Propylthiouracil	0.356164
Auranofin	0.356164
Saxagliptin	0.356164
Tixocortol	0.356164
Artesunate	0.356164
DL-dimyristoylphosphatidylglycerol	0.356164
Diroximel fumarate	0.356164
Fludeoxyglucose (18F)	0.355932
Tolazamide	0.355556
Vilanterol	0.355263
Paramethasone acetate	0.355263
Norepinephrine	0.354839
Phenacemide	0.354839
Panobinostat	0.35443
Glyburide	0.354167
Dicoumarol	0.353846
Chlormerodrin Hg-197	0.353846
Olaparib	0.353659
Trifarotene	0.353659
Allopurinol	0.352941
Trovafloxacin	0.352941
Mivacurium	0.352941
Mebutamate	0.352941
Lorlatinib	0.352273
Trimethadione	0.352113
Amiloride	0.352113
Mebendazole	0.352113
Leflunomide	0.352113
Huperzine A	0.352113
Ataluren	0.352113
Ambrisentan	0.352113
Safinamide	0.352113
Edaravone	0.352113
Sildenafil	0.351852
Nefazodone	0.351648
Theophylline	0.351351
Paramethadione	0.351351
Simvastatin	0.351351
Aminophylline	0.351351
Cortisone acetate	0.351351
Drotaverine	0.351351
Canagliflozin	0.351351
Viloxazine	0.351351
Prednisone acetate	0.351351
Vinflunine	0.351064
Mannitol	0.350877
Sorbitol	0.350877
Fluconazole	0.350649
Ertugliflozin	0.350649
Glutamic acid	0.35
Famciclovir	0.35
Tocainide	0.35
Ambenonium	0.35
Tromethamine	0.35
Reserpine	0.349398
Flumazenil	0.349398
Rimonabant	0.349398
Mephenesin	0.349206
Cabergoline	0.348837
Mycophenolate mofetil	0.348837
Flunitrazepam	0.348837
Maraviroc	0.348837
Trametinib	0.348837
Trypan blue free acid	0.348837
Acetyl sulfisoxazole	0.348837
Vardenafil	0.348624
Warfarin	0.348485
Amrinone	0.348485
Suvorexant	0.348315
Aripiprazole lauroxil	0.348315
Meprobamate	0.347826
Tolmetin	0.347826
Tropicamide	0.347826
Pitavastatin	0.347826
Pravastatin	0.347222
Lorazepam	0.347222
Lovastatin	0.347222
Oxazepam	0.347222
Tetracaine	0.347222
Mephenytoin	0.346667
Rosoxacin	0.346667
Abacavir	0.346667
Roflumilast	0.346667
Dexamethasone acetate	0.346154
Thiamine	0.345679
Oxyphencyclimine	0.345679
Hydrocortisone phosphate	0.345679
Prednisolone phosphate	0.345679
Butylscopolamine	0.345238
Erdafitinib	0.345238
Cysteine	0.344828
Pefloxacin	0.344828
Sunitinib	0.344828
Citric acid	0.344828
Ferric ammonium citrate	0.344828
Ferrous cysteine glycinate	0.344828
Alpelisib	0.344828
Tyrosine	0.344262
Aminolevulinic acid	0.344262
Salicylamide	0.344262
Glymidine	0.344086
Daridorexant	0.344086
Sotorasib	0.344086
Tamsulosin	0.34375
Metyrosine	0.34375
Deferiprone	0.34375
Sodium glycerophosphate	0.34375
Glycol salicylate	0.34375
Sultopride	0.34375
Cianidanol	0.34375
Lapatinib	0.343434
Nitroglycerin	0.343284
Tilarginine	0.343284
Phenytoin	0.342857
Alendronic acid	0.342857
Iopodic acid	0.342857
Isosorbide dinitrate	0.342466
Captopril	0.342466
Finasteride	0.342466
Moclobemide	0.342105
Pramiracetam	0.342105
Loteprednol	0.342105
Palovarotene	0.341772
Niraparib	0.341772
Valbenazine	0.341772
Sulfisoxazole	0.341176
Irbesartan	0.341176
Tolbutamide	0.341176
Doxacurium	0.341176
Sonidegib	0.341176
Tritoqualine	0.340909
Sulfacytine	0.340659
Avibactam	0.340426
Sulpiride	0.34
Tenapanor	0.339806
Threonine	0.339286
Glycerin	0.339286
Aminosalicylic acid	0.33871
Isoxsuprine	0.338462
Chlormerodrin	0.338235
Etacrynic acid	0.338235
Erythrityl tetranitrate	0.338235
Oxitriptan	0.338235
Ramelteon	0.338028
Lubiprostone	0.338028
Arbutamine	0.338028
Pixantrone	0.338028
Axitinib	0.338028
Etoposide	0.337838
Fexofenadine	0.337838
Isosorbide mononitrate	0.337838
Melatonin	0.337838
Florbetapir (18F)	0.337838
Pentosan polysulfate	0.337662
Conivaptan	0.337662
Amcinonide	0.3375
Zolmitriptan	0.3375
Dipyridamole	0.3375
Flavoxate	0.3375
Yohimbine	0.3375
Vernakalant	0.3375
Halcinonide	0.3375
Avacopan	0.3375
Deserpidine	0.337349
Metoclopramide	0.337349
Losartan	0.337209
Phthalylsulfathiazole	0.337209
Sulfadimethoxine	0.337079
Efinaconazole	0.337079
Avatrombopag	0.337079
Gliclazide	0.336957
Linagliptin	0.336957
Caffeine	0.333333
Pregabalin	0.333333
Reboxetine	0.333333
Amsacrine	0.333333
Liothyronine	0.333333
Lidocaine	0.333333
Etomidate	0.333333
Indomethacin	0.333333
Ethambutol	0.333333
Diltiazem	0.333333
Acetohexamide	0.333333
Teniposide	0.333333
Levothyroxine	0.333333
Hexylcaine	0.333333
Dextrothyroxine	0.333333
Cisatracurium	0.333333
Atracurium besylate	0.333333
Olopatadine	0.333333
Mefenamic acid	0.333333
Acetazolamide	0.333333
Eprosartan	0.333333
Oxymetazoline	0.333333
Zaleplon	0.333333
Epoprostenol	0.333333
Pipecuronium	0.333333
Fluocortolone	0.333333
Idelalisib	0.333333
Benzydamine	0.333333
Difluocortolone	0.333333
Propoxycaine	0.333333
Bemotrizinol	0.333333
Acalabrutinib	0.333333
Ribociclib	0.333333
Diaminopropanol tetraacetic acid	0.333333
Rimegepant	0.333333
Clascoterone	0.333333
Tromantadine	0.333333
Bromotheophylline	0.333333
Hydrocortisone probutate	0.333333
Methylprednisolone aceponate	0.333333
Ripretinib	0.333333
Ferric maltol	0.333333
Potassium aspartate	0.333333
Berotralstat	0.333333
Ceritinib	0.330097
Fedratinib	0.330097
Vemurafenib	0.329787
Nizatidine	0.32967
Dacomitinib	0.329545
Aripiprazole	0.329412
Rapacuronium	0.329412
Loperamide	0.329268
Tegaserod	0.329268
Naloxone	0.329268
Molindone	0.329268
Ipratropium	0.329114
Granisetron	0.329114
Diethylamino hydroxybenzoyl hexyl benzoate	0.329114
Hexobendine	0.329114
Montelukast	0.328947
Clocortolone	0.328947
Ezetimibe	0.328947
Etravirine	0.328947
Propyliodone	0.328947
Zolpidem	0.328767
Gadoteridol	0.328767
Fusidic acid	0.328767
Sotagliflozin	0.328767
alpha-Tocopherol succinate	0.328767
Fingolimod	0.328571
Creatine	0.328358
Ethosuximide	0.328358
Unoprostone	0.328358
Phenazopyridine	0.328125
Calcium glycerophosphate	0.328125
Curcumin	0.328125
Ornithine	0.327869
Isoniazid	0.327869
Phenylalanine	0.327586
Dronedarone	0.326531
Quinagolide	0.326316
Quinethazone	0.326087
Infigratinib	0.326087
Sulfametopyrazine	0.325843
Remoxipride	0.325581
Pimavanserin	0.325581
Methylnaltrexone	0.325581
Naloxegol	0.325581
Alectinib	0.325581
Betamethasone phosphate	0.325581
Sulbactam	0.325301
Gadofosveset trisodium	0.325
Desoximetasone	0.324675
Empagliflozin	0.324675
Zofenopril	0.324675
Carbimazole	0.324324
Trilostane	0.324324
Trimebutine	0.324324
Flucytosine	0.323944
Glutethimide	0.323944
Acipimox	0.323944
Strontium ranelate	0.323944
Oxyphenisatin acetate	0.323944
Diloxanide furoate	0.323944
Brinzolamide	0.323529
Zafirlukast	0.323232
Tryptophan	0.323077
Phenyl aminosalicylate	0.323077
Noxytiolin	0.323077
Filgotinib	0.322917
Lysine	0.322581
Mesalazine	0.322581
Tinidazole	0.322581
Patent Blue	0.322581
Taurolidine	0.322222
Gefitinib	0.321839
Bedaquiline	0.321429
Isavuconazole	0.321429
Anagrelide	0.320988
Cinchocaine	0.320988
Imatinib	0.320988
Naltrexone	0.320988
Tiotropium	0.320988
Vilazodone	0.320988
Lomitapide	0.320988
Albendazole	0.320513
Propantheline	0.320513
Prednicarbate	0.320513
Brivaracetam	0.32
Dobutamine	0.319444
Fospropofol	0.319444
Ambroxol	0.319444
Gemeprost	0.319444
Canrenoic acid	0.319444
Carboprost tromethamine	0.318841
Liotrix	0.318841
Risperidone	0.318681
Milrinone	0.318182
Levocarnitine	0.318182
Chlorpropamide	0.318182
Lumiracoxib	0.318182
Edetate disodium anhydrous	0.318182
Sitagliptin	0.317647
Phenylephrine	0.31746
Ethyl ferulate	0.31746
Azathioprine	0.317073
Hydroxychloroquine	0.317073
Acetaminophen	0.316667
Pyrazinamide	0.316667
Beclomethasone dipropionate	0.316456
Phentolamine	0.316456
Dutasteride	0.316456
Difluprednate	0.316456
Duvelisib	0.316456
Oxolamine	0.316456
Lidoflazine	0.316456
Delavirdine	0.316327
Glycine	0.315789
Ulobetasol	0.315789
Cyclopentolate	0.315789
Primaquine	0.315789
Mannitol busulfan	0.315789
Eszopiclone	0.315217
Zopiclone	0.315217
Pantoprazole	0.314607
Iloperidone	0.314607
Indecainide	0.314286
Bethanechol	0.314286
Buprenorphine	0.313953
Nimesulide	0.313953
Ibrutinib	0.313953
Bilastine	0.313953
Alprostadil	0.313433
Gadopentetic acid	0.313433
Dinoprostone	0.313433
Dinoprost tromethamine	0.313433
Acetylcarnitine	0.313433
Indium In-111 pentetate	0.313433
Dinoprost	0.313433
Lisuride	0.313253
Pirenzepine	0.313253
Demecarium	0.313253
Nalmefene	0.313253
Tofacitinib	0.313253
Diclofenac	0.3125
Acamprosate	0.3125
Ibandronate	0.3125
Methoxamine	0.3125
Norgestimate	0.3125
Acetophenazine	0.3125
Sulfoxone	0.3125
Ajmaline	0.3125
Inositol nicotinate	0.3125
Trimetazidine	0.3125
Colfosceril palmitate	0.3125
DL-dimyristoylphosphatidylcholine	0.3125
Lesinurad	0.3125
1,2-Distearoyllecithin	0.3125
Mometasone furoate	0.3125
Indapamide	0.311828
Ropivacaine	0.311688
Bupivacaine	0.311688
Nitisinone	0.311688
Levobupivacaine	0.311688
Capmatinib	0.311688
Levonordefrin	0.311475
Ibutilide	0.311111
Dorzolamide	0.311111
Disopyramide	0.310811
Zileuton	0.310811
Levetiracetam	0.310811
Eslicarbazepine acetate	0.310811
Artemotil	0.310811
Pyridostigmine	0.309859
Oxandrolone	0.309859
Melphalan	0.309859
Gadoteric acid	0.309859
Oxymorphone	0.309524
Tubocurarine	0.309524
Pancuronium	0.309524
Vecuronium	0.309524
Noscapine	0.309524
Ivabradine	0.309524
Indocyanine green acid form	0.309278
Glycolic acid	0.309091
Calcium saccharate	0.309091
Magnesium malate	0.309091
Phenmetrazine	0.308824
Ritodrine	0.308824
Guanfacine	0.308824
Iloprost	0.308824
Sucralfate	0.308642
Encainide	0.308642
Belinostat	0.308642
Cariprazine	0.308642
Ulipristal	0.308642
Fluticasone furoate	0.308642
Metergoline	0.308642
Metolazone	0.308511
Cetirizine	0.307692
Chlorphenesin	0.307692
Berberine	0.307692
Levocetirizine	0.307692
Etilefrine	0.307692
Clobetasol	0.307692
Fluticasone	0.307692
Maralixibat	0.306931
Droperidol	0.306818
Trazodone	0.306818
Azelastine	0.306818
Sulfameter	0.306818
Carbamoylcholine	0.306667
Febuxostat	0.306667
Piretanide	0.306122
Oxycodone	0.305882
Brexpiprazole	0.305882
Ivosidenib	0.305882
Misoprostol	0.305556
Procainamide	0.305556
Podofilox	0.305556
Podophyllin	0.305556
Eslicarbazepine	0.305556
Pipotiazine	0.305263
Buspirone	0.304878
Nalbuphine	0.304878
Alosetron	0.304878
Rabeprazole	0.304348
Amodiaquine	0.303797
Proparacaine	0.303797
Oxybuprocaine	0.303797
Stanozolol	0.303797
Valine	0.303571
Bosutinib	0.303371
Ponatinib	0.303371
Indigotindisulfonic acid	0.303371
Phenprocoumon	0.30303
Edetic acid	0.30303
Eflornithine	0.30303
Hyoscyamine	0.302632
Atropine	0.302632
Nilotinib	0.302632
Treosulfan	0.302632
Baclofen	0.301587
Calcitriol	0.30137
Treprostinil	0.30137
Desoxycorticosterone acetate	0.30137
Paroxetine	0.301205
Antrafenine	0.301205
Lasmiditan	0.301205
Dofetilide	0.301075
Abrocitinib	0.301075
Brilliant blue G	0.301075
Modafinil	0.3
Penicillamine	0.3
Armodafinil	0.3
Agomelatine	0.3
Crizotinib	0.3
Rilmenidine	0.3
Adagrasib	0.298969
Omeprazole	0.298851
Esomeprazole	0.298851
Siponimod	0.298851
Temazepam	0.298701
Sulfacetamide	0.298701
Mepivacaine	0.298701
Lormetazepam	0.298701
Betazole	0.298507
Methylphenidate	0.298507
Nylidrin	0.298507
Dexmethylphenidate	0.298507
Pentetic acid	0.298507
Gallium citrate Ga-67	0.298246
Potassium citrate	0.298246
Sodium citrate	0.298246
Calcium citrate	0.298246
Magnesium citrate	0.298246
Ferric pyrophosphate citrate	0.298246
Manganese citrate	0.298246
Lithium citrate	0.298246
Retapamulin	0.297619
Bendamustine	0.297619
Dolasetron	0.297297
Fesoterodine	0.297297
Piracetam	0.297297
Meclofenamic acid	0.296875
Gabapentin	0.296875
Hydroxyurea	0.296875
Tolfenamic acid	0.296875
Chlorthalidone	0.296703
Hydroflumethiazide	0.296703
Doxapram	0.296296
Loteprednol etabonate	0.296296
Glycopyrronium	0.296296
Bepotastine	0.296296
Dexamethasone metasulfobenzoate	0.295918
Neostigmine	0.295775
Rose bengal I-131	0.295775
Rose bengal	0.295775
Diacetyl benzoyl lathyrol	0.295775
Dopexamine	0.295775
Clobazam	0.294872
Hexocyclium	0.294872
Sufentanil	0.294118
Sulfamethoxazole	0.294118
Quetiapine	0.294118
Hexaminolevulinate	0.294118
Pholcodine	0.294118
Ubidecarenone	0.294118
Pipradrol	0.294118
Pacritinib	0.294118
Bendroflumethiazide	0.293478
Hydrochlorothiazide	0.293478
Bromazepam	0.293333
Etidocaine	0.293333
Zonisamide	0.292683
Methionine	0.292308
Methyl aminolevulinate	0.292308
D-Methionine	0.292308
Selenomethionine Se-75	0.292308
Selenomethionine	0.292308
Racemethionine	0.292308
Benzthiazide	0.291667
Procaine	0.291667
Ubiquinol	0.291667
Brigatinib	0.291667
Fluvoxamine	0.291139
Oxyphenonium	0.291139
Norelgestromin	0.291139
Sodium tartrate	0.290909
Enzalutamide	0.290698
Mitapivat	0.290323
Benoxaprofen	0.289855
Bisphenol A diglycidyl ether	0.289855
Cocaine	0.289474
Ciclopirox	0.289474
Sulfamethazine	0.289157
Upadacitinib	0.289157
Isosulfan blue	0.288889
Nicotinamide	0.288136
Butylene glycol	0.288136
Dopamine	0.287879
Iopanoic acid	0.287879
Stiripentol	0.287879
Bempedoic acid	0.287879
Cantharidin	0.287879
Succinylcholine	0.287671
Butacaine	0.287671
Artenimol	0.287671
Betulinic Acid	0.287671
Fluticasone propionate	0.2875
Methantheline	0.2875
Clobetasol propionate	0.2875
Domperidone	0.287356
Fluspirilene	0.287356
Lurasidone	0.287356
Cyclothiazide	0.287234
Fluorometholone	0.285714
Metocurine iodide	0.285714
Gallamine triethiodide	0.285714
Famotidine	0.285714
Chloroprocaine	0.285714
Gemfibrozil	0.285714
Metocurine	0.285714
Propylene glycol	0.285714
Aclidinium	0.285714
Indoramin	0.285714
Dehydrocholic acid	0.285714
Estramustine phosphate	0.285714
Benperidol	0.284091
Mepenzolate	0.283951
Mefloquine	0.283784
Griseofulvin	0.283784
Moxisylyte	0.283784
Hydralazine	0.283582
Rilpivirine	0.283582
Boscalid	0.283582
Dihydralazine	0.283582
Acetohydroxamic acid	0.283333
Vigabatrin	0.283333
Benzocaine	0.283333
Urethane	0.283333
Oxilofrine	0.283333
Polythiazide	0.282828
Ziprasidone	0.282609
Chlordiazepoxide	0.282353
Sulfamethizole	0.282353
Hydroxyzine	0.282051
Tetrabenazine	0.282051
Lofexidine	0.282051
Deutetrabenazine	0.282051
Piritramide	0.282051
Clobetasone	0.282051
Pipobroman	0.28169
Rivastigmine	0.28169
Ursodeoxycholic acid	0.28169
Cholic Acid	0.28169
Deoxycholic acid	0.28169
Chenodeoxycholic acid	0.28169
Meradimate	0.28169
Phloxine B	0.28169
Kava	0.28125
Glycerol phenylbutyrate	0.28125
Bisacodyl	0.28125
Isosorbide	0.28125
Butamben	0.28125
Vandetanib	0.280899
Pinaverium	0.280899
Pseudoephedrine	0.280702
Ephedrine	0.280702
Sodium oxybate	0.280702
Inositol	0.280702
Racephedrine	0.280702
Nevirapine	0.28
Terfenadine	0.28
Pilocarpine	0.28
Xylometazoline	0.28
Pazopanib	0.27957
Mizolastine	0.27957
Nicoboxil	0.279412
Glasdegib	0.27907
Oliceridine	0.27907
gamma-Aminobutyric acid	0.278689
Homatropine methylbromide	0.278481
Tiagabine	0.278481
Rizatriptan	0.278481
Sulfabenzamide	0.278481
Lamotrigine	0.277778
Chlorothiazide	0.277778
Paricalcitol	0.277778
Calcipotriol	0.277778
Milnacipran	0.277778
Obeticholic acid	0.277778
Oxymetholone	0.277778
Levomilnacipran	0.277778
Florbetaben (18F)	0.277778
Trilaciclib	0.277778
Sulfamerazine	0.277108
Vismodegib	0.277108
Crotamiton	0.276923
Fosfomycin	0.276923
Flufenamic acid	0.276923
Fluciclovine (18F)	0.276923
Edetate calcium disodium anhydrous	0.276923
Nicergoline	0.275862
gamma-Hydroxybutyric acid	0.275862
Cyclopenthiazide	0.27551
Pralidoxime	0.275362
Permethrin	0.275362
Pentaerythritol tetranitrate	0.275362
Tafamidis	0.275362
Bioallethrin	0.275362
Cinoxate	0.275362
Ferric glycerophosphate	0.275362
Propiverine	0.275
Mebeverine	0.275
Dibenzepin	0.275
Lansoprazole	0.274725
Sumatriptan	0.274725
Trichlormethiazide	0.274725
Dexlansoprazole	0.274725
Tranexamic acid	0.274194
Ethyl salicylate	0.274194
Fentanyl	0.273973
Anastrozole	0.273973
Alfacalcidol	0.273973
Piperonyl butoxide	0.273973
Nomegestrol	0.273973
Tizanidine	0.27381
Diamorphine	0.27381
Indocyanine green	0.273684
Mexiletine	0.272727
Phenformin	0.272727
Sulfaphenazole	0.272727
Amiloxate	0.272727
Triheptanoin	0.272727
Alclofenac	0.272727
Darifenacin	0.271605
Danazol	0.271605
Ketorolac	0.271429
Testolactone	0.271429
Amoxapine	0.270588
Estramustine	0.270588
Benzhydrocodone	0.270588
Praziquantel	0.27027
Oxybutynin	0.27027
Artemether	0.27027
Desvenlafaxine	0.27027
Hydroxyprogesterone caproate	0.27027
Gestonorone caproate	0.27027
Bethanidine	0.269841
Aminocaproic acid	0.269841
Ecamsule	0.269663
Solifenacin	0.269231
Pinacidil	0.268657
Mifepristone	0.268293
Silver sulfadiazine	0.268293
Remimazolam	0.268293
Baricitinib	0.268041
Pentamidine	0.267606
Hexamidine	0.267606
Bismuth subgallate	0.267606
Probenecid	0.267442
Clotiazepam	0.267442
Metaraminol	0.266667
Clofazimine	0.266667
Samarium (153Sm) lexidronam	0.266667
Cycloguanil	0.266667
Ropinirole	0.265823
Cimetidine	0.265823
Sulfadiazine	0.26506
Raloxifene	0.26506
Bazedoxifene	0.26506
Methoxsalen	0.264706
Trioxsalen	0.264706
Pirfenidone	0.264706
Sertindole	0.264368
Light green SF yellowish	0.264368
Oxcarbazepine	0.263889
Formestane	0.263889
Apalutamide	0.263736
Succinic acid	0.263158
Phenylpropanolamine	0.263158
Isopropamide	0.263158
Dabrafenib	0.263158
Bismuth subcitrate potassium	0.263158
Acrivastine	0.263158
Magnesium glycinate	0.263158
Aluminum zirconium octachlorohydrex gly	0.263158
Ferrous bisglycinate	0.263158
Ferrous glycine sulfate	0.263158
Tetraferric tricitrate decahydrate	0.263158
Brimonidine	0.2625
Rofecoxib	0.2625
Diazepam	0.2625
Acetylsalicylic acid	0.262295
Fenbufen	0.262295
Amifampridine	0.262295
Lutein	0.261538
Proguanil	0.261538
Zeaxanthin	0.261538
Flurazepam	0.261364
Papaverine	0.26087
Octisalate	0.26087
Vonoprazan	0.26087
Calcifediol	0.260274
Megestrol acetate	0.260274
Medroxyprogesterone acetate	0.260274
Imiquimod	0.260274
Frovatriptan	0.260274
Methsuximide	0.260274
Doxercalciferol	0.260274
Perampanel	0.260274
Parthenolide	0.260274
Nomegestrol acetate	0.260274
D-alpha-Tocopherol acetate	0.260274
DL-alpha tocopheryl acetate	0.260274
Doxylamine	0.25974
Carbinoxamine	0.25974
Bepridil	0.25974
Telmisartan	0.259259
Prazepam	0.259259
Rucaparib	0.259259
Amiodarone	0.258824
Dihydrocodeine	0.258824
Aminobenzoic acid	0.258621
Astemizole	0.258427
Tapinarof	0.258065
Naratriptan	0.257732
Masoprocol	0.257576
Guanabenz	0.257576
Hydroxystilbamidine	0.257576
Phensuximide	0.257143
Bismuth subsalicylate	0.257143
Amylocaine	0.257143
Nabilone	0.256757
Rimexolone	0.256757
Phendimetrazine	0.256757
Oxeladin	0.256757
Dienogest	0.256757
Ethylhexyl methoxycrylene	0.256757
Segesterone acetate	0.256757
Tramadol	0.25641
Anileridine	0.25641
Taurine	0.25641
Pramocaine	0.25641
Mazindol	0.256098
Sulfapyridine	0.256098
Thonzylamine	0.256098
Oxatomide	0.256098
Loratadine	0.255814
Lonafarnib	0.255814
Netupitant	0.255814
Chlormezanone	0.255556
Laropiprant	0.255319
Phenelzine	0.253968
Salsalate	0.253968
Loxoprofen	0.253968
Fluorescein	0.253731
Histamine	0.253731
Methacholine	0.253731
Atomoxetine	0.253521
Chlorambucil	0.253521
Edrophonium	0.253521
Nonoxynol-9	0.253521
Efavirenz	0.253333
Chlorhexidine	0.253333
Pentoxyverine	0.253333
Trospium	0.253165
Butorphanol	0.253165
Clidinium	0.253165
Fenoldopam	0.253165
Halazepam	0.253012
Flosequinan	0.253012
Minoxidil	0.252874
Emedastine	0.252874
Thonzonium	0.252874
Venlafaxine	0.25
Chlorzoxazone	0.25
Triamterene	0.25
Spironolactone	0.25
Acitretin	0.25
Anisotropine methylbromide	0.25
Azelaic acid	0.25
Clonidine	0.25
Sulindac	0.25
Diethylcarbamazine	0.25
Perphenazine	0.25
Salicylic acid	0.25
Etidronic acid	0.25
Diazoxide	0.25
Zuclopenthixol	0.25
Clofedanol	0.25
Ospemifene	0.25
Arzoxifene	0.25
Mepyramine	0.25
Plerixafor	0.25
Technetium Tc-99m etidronate	0.25
Homosalate	0.25
Trolamine salicylate	0.25
Homatropine	0.25
Padimate O	0.25
Diacerein	0.25
Mandelic acid	0.25
Ritiometan	0.25
Fenofibric acid	0.25
Testosterone cypionate	0.25
Propylparaben	0.25
Thiothixene	0.247423
Sulthiame	0.247312
Valdecoxib	0.247059
Fluphenazine	0.247059
Galantamine	0.247059
Flupentixol	0.247059
Meticrane	0.247059
Oxiconazole	0.246914
Dapiprazole	0.246914
Apraclonidine	0.246753
Amifostine	0.246753
Fluoxymesterone	0.246753
Mafenide	0.246753
Ebastine	0.246753
Medrysone	0.246575
Dextropropoxyphene	0.246575
Drospirenone	0.246575
Nandrolone decanoate	0.246575
Amorolfine	0.246575
Estetrol	0.246575
Clofibrate	0.246377
Octocrylene	0.246377
Medifoxamine	0.246377
Vitamin A	0.246154
Betaine	0.246154
Medronic acid	0.246154
Butylparaben	0.246154
Ethyl hydroxybenzoate	0.245902
Paraldehyde	0.245614
Physostigmine	0.244186
Pentazocine	0.243902
Almitrine	0.243902
Periciazine	0.243902
Sodium camphorsulfonate	0.243902
Quinine	0.24359
Eplerenone	0.24359
Tazarotene	0.24359
Quinidine	0.24359
Quinidine barbiturate	0.24359
Dequalinium	0.24359
Cyproterone acetate	0.24359
Pyrimethamine	0.243243
Dronabinol	0.243243
Ethynodiol diacetate	0.243243
Testosterone propionate	0.243243
Testosterone enanthate	0.243243
Testosterone undecanoate	0.243243
Prasterone enantate	0.243243
Choline	0.242857
Tolazoline	0.242857
Choline C 11	0.242857
Choline C-11	0.242857
Menthyl salicylate	0.242857
Temoporfin	0.242857
Benziodarone	0.242857
Adenine	0.242424
Cyclandelate	0.242424
Betahistine	0.242424
Triflusal	0.242424
Avobenzone	0.242424
Almotriptan	0.242105
Hydroxyamphetamine	0.241935
Loxapine	0.241379
Pimozide	0.241379
Flibanserin	0.241379
Chromium picolinate	0.241379
Morphine	0.240964
Hydromorphone	0.240964
Levocabastine	0.240964
Apomorphine	0.240506
Propiomazine	0.240506
Donepezil	0.240506
Hexetidine	0.240506
Tropisetron	0.240506
Zytron	0.240506
Tioguanine	0.24
Palonosetron	0.24
Biperiden	0.24
Doxepin	0.24
Abiraterone	0.24
Pexidartinib	0.24
Mercaptopurine	0.239437
Prasterone	0.239437
Vanillyl butyl ether	0.239437
Dimetotiazine	0.23913
Triclocarban	0.238806
Levomenol	0.238806
Trolamine	0.238806
Dimazole	0.238636
Codeine	0.238095
Hydrocodone	0.238095
Docusate	0.238095
Aluminum subacetate	0.238095
Ondansetron	0.2375
Miltefosine	0.2375
Benzethonium	0.2375
Miconazole	0.236842
Econazole	0.236842
Ruxolitinib	0.236842
Isoconazole	0.236842
Umeclidinium	0.236842
Lactic acid	0.236364
L-Lactic acid	0.236364
Cholecalciferol	0.236111
Testosterone	0.236111
Pregnenolone	0.236111
Acetylcholine	0.236111
Cholesterol	0.236111
Gestrinone	0.236111
Adiphenine	0.236111
Celecoxib	0.235955
Sulfathiazole	0.235294
Ciprofibrate	0.235294
Haloperidol	0.234568
Bromperidol	0.234568
Foscarnet	0.234375
Technetium Tc-99m oxidronate	0.234375
Dioxybenzone	0.234375
1,2-Benzodiazepine	0.234375
Oxidronic acid	0.234375
Toremifene	0.233766
Dyclonine	0.233766
Tamoxifen	0.233766
Antazoline	0.233766
Choline magnesium trisalicylate	0.233333
Benzoyl peroxide	0.233333
Choline salicylate	0.233333
Avapritinib	0.233333
Vitamin E	0.232877
Levonorgestrel	0.232877
Trihexyphenidyl	0.232877
Malathion	0.232877
Nandrolone phenpropionate	0.232877
Orphenadrine	0.232877
Levacetylmethadol	0.232877
Estriol	0.232877
Methyltestosterone	0.232877
Naphazoline	0.232877
Cannabidiol	0.232877
Tibolone	0.232877
Norgestrel	0.232877
DL-alpha-Tocopherol	0.232877
Prasugrel	0.232558
Ethinamate	0.231884
Fenofibrate	0.231884
Verapamil	0.231707
Methotrimeprazine	0.231707
Alitretinoin	0.230769
Tretinoin	0.230769
Isotretinoin	0.230769
Tioconazole	0.230769
Diethyltoluamide	0.230769
Isoxaflutole	0.229885
Etonogestrel	0.22973
Dicyclomine	0.22973
Cycrimine	0.22973
Crisaborole	0.22973
Estradiol acetate	0.22973
Butaperazine	0.228916
Octinoxate	0.228571
Brilliant green cation	0.228571
Succimer	0.22807
Technetium Tc-99m succimer	0.22807
Dimercaptosuccinic acid	0.22807
Pramipexole	0.227848
Triazolam	0.227848
Iobenguane sulfate I-123	0.227273
Tripelennamine	0.226667
Estradiol dienanthate	0.226667
Alcaftadine	0.22619
Zotepine	0.22619
Suprofen	0.225806
Tiaprofenic acid	0.225806
Methyl salicylate	0.225806
DL-Methylephedrine	0.225806
Benzylparaben	0.225806
Dimenhydrinate	0.225352
Dihydrotachysterol	0.225352
Diphenhydramine	0.225352
Sertaconazole	0.225
Lumefantrine	0.225
Vortioxetine	0.225
Picosulfuric acid	0.225
Lumefantrine co-artemether	0.225
Amitriptylinoxide	0.225
Niacin	0.224138
Ketoprofen	0.224138
Ibuprofen	0.224138
Dimercaprol	0.224138
Dexibuprofen	0.224138
Dexketoprofen	0.224138
Chromium nicotinate	0.224138
[truncated: 587 more rows]
